1 **Multiple introductions of multidrug-resistant typhoid associated with acute**  
2 **infection and asymptomatic carriage, Kenya**

3 \*Samuel Kariuki<sup>1,2</sup>, \*Zoe A Dyson<sup>2,3,4,5</sup>, Cecilia Mbae<sup>1</sup>, Ronald Ngetich<sup>1</sup>, Susan M  
4 Kavai<sup>1</sup>, Celestine Wairimu<sup>1</sup>, Stephen Anyona<sup>1</sup>, Naomi Gitau<sup>1</sup>, Robert Onsare<sup>1</sup>, Beatrice  
5 Ongandi<sup>1</sup>, Sebastian Duchene<sup>6</sup>, Mohamed Ali<sup>7</sup>, John Clemens<sup>8</sup>, \*Kathryn E Holt<sup>4,5</sup>,  
6 \*Gordon Dougan<sup>3</sup>

7  
8 **Affiliations:**

- 9 1. Centre for Microbiology Research, Kenya Medical Research Institute, Kenya.  
10 2. Wellcome Sanger Institute, Wellcome Genome Campus, Hinxton, Cambridge, United  
11 Kingdom  
12 3. Cambridge Institute of Therapeutic Immunology & Infectious Disease (CITIID), Department of  
13 Medicine, University of Cambridge, Cambridge, UK.  
14 4. London School of Hygiene & Tropical Medicine, London WC1E 7HT, UK  
15 5. Department of Infectious Diseases, Central Clinical School, Monash University, Melbourne,  
16 Victoria 3004, Australia  
17 6. Department of Microbiology and Immunology, The University of Melbourne at The Peter  
18 Doherty Institute for Infection and Immunity, Melbourne, VIC, Australia  
19 7. Department of International Health, John's Hopkins University, USA.  
20 8. International Diarrheal Diseases Research Centre, Dhaka, Bangladesh.

21  
22 \*Indicates equal contribution

23  
24 Corresponding author:

25 Prof Samuel Kariuki

26 Director, Research and Development, KEMRI, Kenya

27 Address: Off Mbagathi Road, Nairobi, PO Box 54840-00200, Nairobi, Kenya

28 Mobile: +254-722-232467; Email address: [Samkariuki2@gmail.com](mailto:Samkariuki2@gmail.com)/[skariuki@kemri.org](mailto:skariuki@kemri.org)

29

## 30 **Abstract**

31 Understanding the dynamics of infection and carriage of typhoid in endemic settings is  
32 critical to finding solutions to prevention and control. In a 3 year case-control study, we  
33 investigated typhoid among children aged <16 years (4,670 febrile cases and 8,549 age  
34 matched controls) living in an informal settlement, Nairobi, Kenya. 148 *S. Typhi* isolates  
35 from cases and 95 from controls (stool culture) were identified; a carriage frequency of  
36 1%. Whole-genome sequencing showed 97% of cases and 88% of controls were  
37 genotype 4.3.1 (Haplotype58), with the majority of each (76% and 88%) being  
38 multidrug-resistant strains in 3 sublineages of H58 genotype (East Africa 1 (EA1), EA2,  
39 and EA3), with sequences from cases and carriers intermingled. The high rate of  
40 multidrug-resistant H58 *S. Typhi*, and the close phylogenetic relationships between  
41 carriers and controls, provides evidence for the role of carriers as a reservoir for the  
42 community spread of typhoid in this setting.

43

## 44 **Introduction**

45 Typhoid fever, caused by *Salmonella enterica* serovar Typhi (*S. Typhi*) is estimated to  
46 involve ~21.7 million illnesses and 216,000 deaths annually <sup>1,2</sup>, with most of these  
47 occurring in lower and middle-income countries. In Africa, overall typhoid is now  
48 estimated to have an average annual pooled incidence rate of 112.1 (95% CI, 46.7–  
49 203.5) cases per 100,000 people <sup>3,4</sup> with a case fatality rate (CFR) of 5.4% (2.7-8.9)<sup>5</sup>.

50

51 Control of typhoid is impeded by asymptomatic carriage, which historically was  
52 estimated to account for 2-5% of individuals infected<sup>6-8</sup>. However, there is a paucity of  
53 recent data on the frequency of carriers in different settings including sub-Saharan  
54 Africa (SSA) as well as the extent to which they contribute to disease transmission<sup>9</sup>. A  
55 recent modelling study using data generated in Blantyre, Malawi, identified multidrug  
56 resistant (MDR) *S. Typhi* and/or the emergence of the lineage known as H58 (genotype  
57 4.3.1) as a primary driver of an increasing number of typhoid fever cases. In this study,  
58 an estimated 45-95% of typhoid transmission was attributed to carriers<sup>10,11</sup>. *S. Typhi*  
59 H58<sup>12</sup> is a globally disseminated clade frequently associated with MDR (defined as  
60 resistance to chloramphenicol, ampicillin and co-trimoxazole) and an increasing  
61 frequency of reduced susceptibility to fluoroquinolones. H58 *S. Typhi* are rapidly  
62 displacing other lineages in many endemic areas<sup>12-15</sup> and a new subclade that is  
63 extensively drug resistant (XDR), displaying resistance to ciprofloxacin and  
64 fluoroquinolones in addition to MDR, has been described in Pakistan<sup>16</sup>.

65  
66 Recent reports of epidemics of typhoid fever in SSA suggest that the disease may be  
67 becoming more widespread in the region<sup>1,15,17-20</sup>. In Kenya, the rapid growth of  
68 population has led to a huge rural-to-urban migration with people increasingly living in  
69 informal settlements where clean water and good sanitation are a major challenge<sup>21,22</sup>.  
70 The incidence of typhoid in one such informal settlement, Kibera in Nairobi, was  
71 estimated at 247 cases per 100,000 with the highest rates in children 5-9 years old (596  
72 per 100,000)<sup>23</sup>. For the last two decades the majority of cases of typhoid in Kenya have  
73 been MDR, with reduced susceptibility to fluoroquinolones rising in frequency<sup>14,15,24</sup>.

74 Previously, we showed that *S. Typhi* H58 gained a foothold in Kenya in the 1990s,  
75 constituting >75% of the circulating *S. Typhi* we have characterized since 2001<sup>14</sup>. Two  
76 H58 lineages were detected; lineage I being isolated between 1988-2008 and lineage II  
77 from 2004 onwards. We have previously observed carriage rates of 6% in households  
78 where typhoid cases were detected<sup>14</sup>, however these *S. Typhi* isolates were not  
79 characterized genetically and the role of asymptomatic carriers in transmission  
80 dynamics of typhoid in the community is still poorly understood. Over the past 7 years  
81 we have been intensively studying typhoid and other invasive bacterial diseases in  
82 Mukuru, an informal settlement 15 km east of the city of Nairobi, Kenya. The prevalence  
83 of *S. Typhi* infections among 16,236 children was 1.4% (CI: 1.2-1.6%), and higher  
84 amongst males (1.8% vs. 1.2% for females), with a high proportion of infections noted  
85 among older children 5-8 years in age<sup>25</sup>. Risk factors predictive of *S. Typhi* infection in  
86 Mukuru were multiple but were predominantly associated with contaminated water  
87 sources and sanitation issues<sup>25</sup>. Here, we analysed typhoid cases in Mukuru clinically  
88 and microbiologically, and identified frequent asymptomatic carriage among children  
89 below 16 years of age. By exploiting whole genome sequencing (WGS) and geospatial  
90 mapping we characterised the population structure and transmission dynamics of *S.*  
91 *Typhi* in this location.

92

## 93 **Materials and Methods**

### 94 ***Study site***

95 Mukuru informal settlement is situated East of Nairobi city, about 15 km from the city  
96 centre. It is one of the largest slums in the city with a population of around 250,000

97 people<sup>26</sup>. The informal settlement is made up of improvised temporary dwellings often  
98 made from scrap materials, such as corrugated metal sheets, plywood, and polythene-  
99 sheets<sup>27</sup>. In addition to poverty, a number of factors associated with informal  
100 settlements, including overcrowding, substandard housing, unclean and insufficient  
101 quantities of water, and inadequate sanitation, contribute to a high incidence of  
102 infectious diseases and increased mortality among children under five years<sup>21,28</sup>.  
103 Mukuru informal settlement is divided into eight villages; Mukuru Lunga-Lunga, Mukuru  
104 kwa Sinai, Mukuru kwa Ruben, Mukuru kwa Njenga, Mukuru Kayaba, Fuata Nyayo,  
105 Jamaica, and Mukuru North. This study was carried out in two of the large villages,  
106 Mukuru kwa Njenga and Mukuru kwa Ruben, with a combined population of 150,000.  
107 Spatial mapping of the two villages was conducted using the Universal Transverse  
108 Mercator system<sup>29</sup>, and patient details collected as described previously<sup>25</sup>.  
109  
110 The two villages in the informal settlement are served by three outpatient clinics: Ruben  
111 Health Centre located in the Ruben village (zone named Simba cool, serves  
112 approximately 30% of the population), Missionaries of Mary Located in Kwa Njenga  
113 village (zone named Vietnam, serves approximately 45% of the population), and County  
114 Government Clinic in Kwa Njenga village (Zone named MCC and serves approximately  
115 25% of the population). The fourth site, Mbagathi District Hospital, is located on the  
116 western side of Nairobi city, 5 km from city centre and was used as a referral facility.  
117 Participants living outside of the mapped demographic surveillance site (DSS) who  
118 came to seek medical services in any of the three study site health facilities or at

119 Mbagathi District Hospital were included for the purpose of tracking typhoid cases and  
120 carriers treated at the facilities, but are reported separately in the results section.

121

### 122 ***Recruitment of clinical typhoid fever cases and asymptomatic typhoid carriers***

123 Typhoid fever cases and asymptomatic carriers presented in this study were identified  
124 and recruited as part of a larger study on surveillance and genomics of invasive  
125 *Salmonella* disease in children and young adults less than 16 years of age<sup>25,30</sup>.

126 Children presenting as outpatients at the three study clinics and Mbagathi District  
127 Hospital between August 2013 and November 2016 were triaged to identify those with  
128 fever, headache and/or diarrhoea for recruitment into the study as potential cases.

129 Patients with current fever ( $\geq 38^{\circ}\text{C}$ ) and reportedly febrile for  $\geq 3$  days were considered  
130 potential typhoid cases and assessed via blood culture. The primary typhoid case  
131 definition (data presented in **Table 1**) was children aged 0-16 years with  $\geq 3$  days fever  
132  $\geq 38^{\circ}\text{C}$  and positive blood or stool culture for *S. Typhi* (see bacterial culture methods  
133 below).

134

135 During the study period, age-matched controls were recruited from children without  
136 current fever or diarrhoea attending the same health facilities for healthy mother and  
137 child clinics (e.g. for vaccination and nutritional advice). Those with *S. Typhi* positive  
138 stool culture were designated as asymptomatic typhoid carriers as described previously  
139<sup>25</sup>. Hence, the inclusion criteria for asymptomatic typhoid carriers (data presented in  
140 **Table 1**) were children aged 0-16 years with no diarrhoea, no current fever, and no  
141 recent fever history, with stool culture positive for *S. Typhi* (see bacterial culture

142 methods below). The total number of participants was computed on the basis of a 4%  
143 prevalence rate of typhoid from previous study<sup>14</sup>. (A structured questionnaire was used  
144 to collect demographic data for both cases and controls recruited into the study as  
145 described previously<sup>25</sup>.

146

147 All isolates cultured from participants and identified as *Salmonella* were archived and  
148 later revived for WGS as detailed below. The sequence data revealed some mis-  
149 identification of *Salmonella* serotypes (**Fig. 1 and Table S1**), hence for genomic  
150 analyses we included all cases and controls whose cultures were found to be *S. Typhi*  
151 positive by WGS rather than those identified as *S. Typhi* positive by serotype in the  
152 microbiology laboratory.

153

#### 154 ***Bacterial culture***

155 For blood culture, 1-3 mL for children <5 years of age and 5-10 mL for those 5-16 years  
156 of age was collected in a syringe, placed into Bactec media bottles (Becton-Dickinson,  
157 New Jersey, USA), incubated at 37°C in a computerized BACTEC™ 9050 Blood  
158 Culture System (Becton-Dickinson), and subcultured after 24-48 h onto blood, chocolate  
159 and MacConkey agar (Oxoid, Basingstoke, UK) plates. For stool culture, rectal swabs or  
160 stool samples were obtained from each potential carrier and cultured on selenite F  
161 (Oxoid) broth aerobically at 37°C overnight. Broth cultures were then subcultured on  
162 MacConkey agar and *Salmonella-Shigella* agar (Oxoid) and incubated at 37°C  
163 overnight. Blood and stool isolates were identified using a series of standard  
164 biochemical and serological tests as described previously<sup>25</sup>.

165

166 ***Antimicrobial susceptibility testing***

167 Antimicrobial susceptibility testing was performed using the disk diffusion technique for  
168 ampicillin 10 µg, tetracycline 30 µg, co-trimoxazole 25 µg, chloramphenicol 30 µg,  
169 cefpodoxime 30 µg, ceftazidime 30 µg, ceftriaxone 30 µg, cefotaxime 30 µg,  
170 ciprofloxacin 5 µg and nalidixic acid 10 µg as described previously<sup>25</sup>. Results were  
171 interpreted according to the 2017 guidelines provided by the Clinical and Laboratory  
172 Standards Institute (CLSI)<sup>31</sup>.

173

174 ***Whole genome sequencing***

175 All *Salmonella* isolated from cases and controls were subcultured at the end of the  
176 study for DNA extraction and WGS. These included 243 cultures identified as *S. Typhi*  
177 from cases (85 from blood and 63 from stool) and 95 from controls (all from stool) (see  
178 **Fig. 1** and **Table S1**), which are the subject of this study (non-typhoidal *Salmonella* data  
179 is reported elsewhere<sup>30</sup>). Twelve *S. Typhi* case isolates and 10 control isolates could  
180 not be revived and were not further analysed. DNA was extracted using the Wizard  
181 Genomic DNA Extraction Kit (Promega, Wisconsin, USA) and shipped on ice to the  
182 Wellcome Sanger Institute for sequencing using the Illumina platform as described  
183 previously<sup>15</sup>. A total of 217 *S. Typhi* DNA samples were successfully sequenced (two  
184 were of insufficient quality to construct sequencing libraries, or failed sequencing). Non-  
185 *S. Typhi* bacterial DNA sequences were detected in 75 samples (34.6%; organisms  
186 detected are shown in **Table S1**), and 11 sequences originally identified as other  
187 *Salmonella* serotypes were later found to be *S. Typhi* with genomic data. Two



188 sequences showed the presence of *S. Typhi*, but at low depth, and were subsequently  
189 omitted from further genomic analyses, leaving genome data for 153 *S. Typhi* isolates  
190 for further analysis.

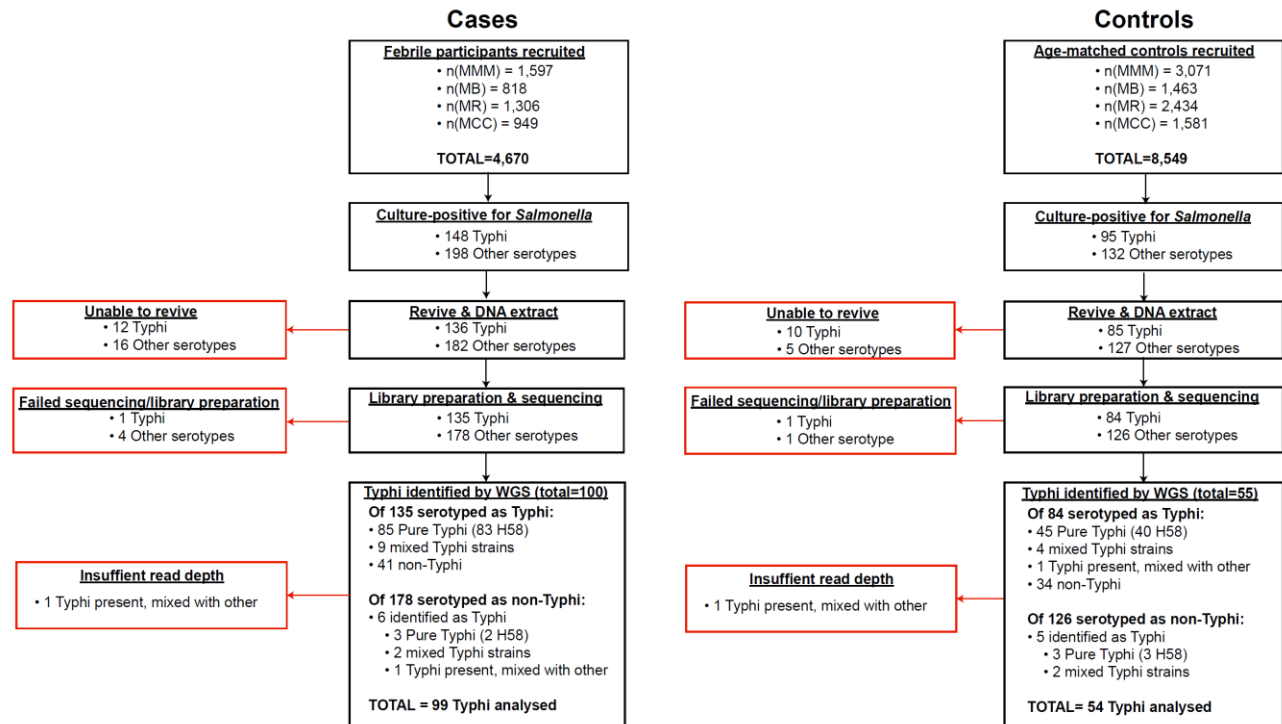

191  
192 **Fig. 1. Flow chart of samples collected and analysed.** Red boxes indicate bacterial  
193 isolates that could not be included in downstream genetic analyses, grouped by reason  
194 for exclusion.

195

196

### 197 ***Phylogenetic and SNP analysis of *S. Typhi* isolates***

198 For SNP analysis, paired-end reads from 153 *S. Typhi* isolates were mapped to the

199 reference sequence of *S. Typhi* CT18 (accession number: AL513382)<sup>32</sup> using the

200 RedDog mapping pipeline (v1beta.10.3), available at <http://github.com/katholt/reddog>

201 and detailed in **supplementary methods**. Read alignments were used to assign

202 isolates to previously defined lineages according to the extended genotyping framework

203 <sup>33,34</sup> with the GenoTyphi pipeline (available at <http://github.com/katholt/genotyphi>).

204 Unique SNPs defining three novel lineages were identified from the genome-wide SNP

205 allele table and added to the GenoTyphi scheme to facilitate easy identification of these

206 lineages in future studies (details in **supplementary methods and results**).

207

208 Phylogenetic analyses were restricted to WGS-confirmed pure cultures of *S. Typhi* H58

209 (genotype 4.3.1, n=128). For some analyses, an additional 1,076 *S. Typhi* H58

210 genomes from previously published WGS studies of global and African isolates <sup>12,15,33,35</sup>

211 were also included for context, along with 61 non-H58 genomes for phylogenetic

212 outgroup rooting, using the same mapping approach detailed above (see **Table S2** for

213 full list of genomes analysed and their public data accessions). SNPs called in phage

214 regions or repetitive sequences were filtered from the alignment (details in

215 **supplementary methods**), and any further recombinant regions identified and removed

216 with Gubbins (v2.3.2) <sup>36</sup>. This resulted in a final set of 8,635 SNPs. From this global

217 alignment we extracted a separate SNP alignment for the set of 239 Kenyan *S. Typhi*

218 4.3.1 genomes (n=128 from this study and n=111 from published studies, see **Table S3**

219 <sup>15,33</sup>), the resulting alignment of length 489 SNPs was used for temporal analyses

220 (described below and in **supplementary methods**).

221 Maximum likelihood (ML) phylogenetic trees were inferred from SNP alignments using

222 RAxML (v8.2.9) <sup>37</sup> (as detailed in **supplementary methods**) and the resulting trees

223 were visualized using Microreact (interactive global H58 phylogeny available at:

224 <https://microreact.org/project/wViqmaRdZuFVEb6yk4i1jU>) <sup>38</sup>.

225

226 Pairwise SNP distances were calculated from the SNP alignment using the `dist.dna()`  
227 function in the R package *ape* (v5.4.1)<sup>39</sup>. Terminal branch lengths were extracted from  
228 phylogenies using R package *ggtree* (v2.2.4)<sup>40</sup>. Non-synonymous mutations occurring  
229 in terminal branches were detected using *SNPPar* (v0.4.2dev)<sup>41</sup> and grouped by  
230 function based on the gene in which they were found, according to the functional  
231 classification scheme in the genome annotation of *S. Typhi* CT18<sup>8,32</sup>.

232

### 233 ***Phylogenetic analysis***

234 To investigate temporal signal and date the introduction of *S. Typhi* H58 into Kenya  
235 based on the 239 available Kenyan genomes (n=128 from this study, and n=111 from  
236 previous studies<sup>15,33</sup>), we used several methods. First, we used *TempEst* (v1.5.1)<sup>42</sup> to  
237 assess temporal structure (i.e. clock-like evolution) by conducting a regression analysis  
238 of the root-to-tip branch distances of the ML tree as a function of sampling date, and  
239 later a date-randomisation test (full details of temporal signal assessment and model  
240 selection are provided in **supplementary methods**). To estimate divergence dates for  
241 the three *S. Typhi* H58 sublineages we detected in Kenya (EA1-3), we used *BEAST*  
242 (v1.10)<sup>43</sup> to fit a phylodynamic model to the SNP alignment and isolation dates as  
243 described in **supplementary methods**. The resultant MCC tree was visualized using  
244 *ggtree* (v2.2.4)<sup>40</sup> and *Microreact*<sup>38</sup> (interactive phylogeny available at:  
245 <https://microreact.org/project/I2KUoasUB>).

### 246 ***Genomic determinants of antimicrobial resistance***

247 The read mapping-based allele typer *SRST2* (v0.2.0)<sup>44</sup> was used to detect the  
248 presence of plasmid replicons (*PlasmidFinder* database<sup>45</sup>) and antimicrobial resistance

249 (AMR) genes (ARGannot database <sup>46</sup>). Where AMR genes were observed without  
250 evidence of a known AMR plasmid, raw read data was assembled using Unicycler  
251 (v0.4.7) <sup>47</sup> and then examined using Bandage (v0.8.1) <sup>48</sup> to confirm the chromosomal  
252 location and composition of AMR-associated transposons. ISMapper (v2.0) <sup>49</sup> was also  
253 used to identify the location of IS1 insertion sequences in the *S. Typhi* chromosome as  
254 described in **supplementary methods**. Point mutations located within the quinolone  
255 resistance determining region (QRDR) of genes *gyrA*, *gyrB*, and *parC* associated with  
256 reduced susceptibility to fluoroquinolones <sup>35</sup> were detected using GenoTyphi <sup>33,34</sup> as  
257 detailed in **supplementary methods**.

258

### 259 ***Statistical and spatial analysis***

260 All statistical analyses unless otherwise stated were carried out using R (v4.0.2). Details  
261 of specific functions within R packages used for individual analyses are available in  
262 **supplementary methods**.

263

### 264 ***Nucleotide sequence and read data accession numbers***

265 Raw Illumina sequence reads have been submitted to the European Nucleotide Archive  
266 (ENA) under accession PRJEB19289. Individual sequence accession numbers are  
267 listed in **Table S1**.

268

### 269 ***Ethical Considerations***

270 The study was approved by the Scientific and Ethics Review Unit (SERU) of the Kenya  
271 Medical Research Institute (KEMRI) (Scientific Steering Committee No. 2076). All

272 parents and/or guardians of participating children were informed of the study objectives  
273 and voluntary written consent was sought and obtained before inclusion. A copy of the  
274 signed consent was filed and stored in password protected cabinets at KEMRI.

275

## 276 **Results**

### 277 ***Detection of S. Typhi cases and asymptomatic carriers***

278 From August 2013-November 2016, a total of 4,670 febrile children were recruited  
279 across the four study sites and subjected to blood and/or stool culture. *S. Typhi* was  
280 identified in cultures from 148 children (3.2%); the annual rate was steady over the  
281 study period but significantly higher amongst males (4.0% vs 2.3%,  $p=0.0008$ , see  
282 **Table 1**). The odds of *S. Typhi* positive culture increased significantly with age (OR  
283 1.08,  $p=0.0005$ ) but the effect was restricted to males (see **Table 1**), amongst whom the  
284 isolation rate was 1.3% in those  $\leq 1$  year, 2.0% in those aged 1-7 years, and 3.4% in  
285 those  $>7$  years old (compared with 0.95%, 1.1% and 0.94%, respectively amongst  
286 females). A total of 8,549 age-matched control participants (with no current diarrhoea  
287 and no recent fever history) were recruited and subjected to stool culture. *S. Typhi* was  
288 identified in cultures from  $n=95$  (1.1%); these are considered asymptomatic carriers. *S.*  
289 *Typhi* culture positivity amongst controls was not significantly associated with age or sex  
290 and was stable over the study period (see **Table 1 and Table S4**). No significant  
291 statistical association was found between phenotypic or genotypic AMR patterns and  
292 case/control status, age, or sex.

293

### 294 **Table 1. Culture positive typhoid cases and asymptomatic carriers**

|                                                                        | <b>Cases</b>   | <b>Controls</b> 295 |
|------------------------------------------------------------------------|----------------|---------------------|
| <b>Participants tested, N</b>                                          | 4,670          | 8,549               |
| Male, N (%)                                                            | 2,497 (53.5%)  | 4,260 (49.8%)       |
| Female, N (%)                                                          | 2,173 (46.5%)  | 4,289 (50.2%)       |
| <b>S. Typhi culture positive, N (%)</b>                                | 148 (3.2%)     | 95 (1.1%)           |
| Male, N (%)                                                            | 99 (4.0%)      | 49 (1.15%)          |
| Female, N (%)                                                          | 49 (2.3%)      | 46 (1.1%)           |
| <b>WGS confirmed S. Typhi, N (%)</b>                                   | 100 (2.1%)     | 55 (0.64%)          |
| <b>Logistic regression for S. Typhi culture positive</b>               |                |                     |
| Year of isolation, OR (p-value)                                        | 1.19 (0.072)   | 0.94 (0.586)        |
| Male Sex, OR (p-value)                                                 | 1.81 (0.0008*) | 1.08 (0.699)        |
| Age in years, OR (p-value)                                             | 1.08 (0.0005*) | 1.02 (0.403)        |
| <b>Logistic regression for S. Typhi culture positive, males only</b>   |                |                     |
| Year of isolation, OR (p-value)                                        | 1.19 (0.147)   | 1.09 (0.576)        |
| Age in years, OR (p-value)                                             | 1.11 (0.0001*) | 1.06 (0.082)        |
| <b>Logistic regression for S. Typhi culture positive, females only</b> |                |                     |
| Year of isolation, OR (p-value)                                        | 1.19 (0.296)   | 0.81 (0.158)        |
| Age in years, OR (p-value)                                             | 1.03 (0.551)   | 0.98 (0.534)        |

296 Note the values reported for logistic regressions are from multivariate models including all indicated  
 297 covariates, fit separately for cases and controls.  
 298

299

### 300 ***Global population structure and antimicrobial resistance profiles of Kenyan S.***

#### 301 **Typhi**

302 The presence of *S. Typhi* was confirmed by WGS in 94 cases (64%) and 50 controls  
 303 (53%) that were originally identified as *S. Typhi* via microbiological culture (**Fig. 1, Table**  
 304 **S1**). *S. Typhi* genotype 4.3.1 (H58) was dominant throughout the study (n=145, 95%),  
 305 amongst both cases and controls (**Table 2**). Five other genotypes were detected: 2.2.2  
 306 (n=1), 2.5.0 (n=3), 3.0.0 (n=3), and 4.1.1 (n=1), see **Table 2**.

307

#### 308 **Table 2. Genotypes and AMR profiles for 153 sequenced *S. Typhi* isolates**

| <b>Genotype</b> | <b>Cases</b> | <b>Controls</b> | <b>MDR</b> | <b>GyrA mutation</b> | <b>GyrB</b> |
|-----------------|--------------|-----------------|------------|----------------------|-------------|
|-----------------|--------------|-----------------|------------|----------------------|-------------|

|                      |          |          |          |            |          |           |          | mutation   |
|----------------------|----------|----------|----------|------------|----------|-----------|----------|------------|
|                      |          |          | Plasmid  | Chromosome | S83F     | S83Y      | D87G     | S464F      |
| All                  | 99       | 54       | 83       | 33         | 3        | 17        | 2        | 75         |
| 2.2.2                | 0        | 1 (1.9%) | 0        | 0          | 0        | 0         | 0        | 0          |
| 2.5.0                | 1 (1.0%) | 2 (3.7%) | 0        | 0          | 0        | 0         | 0        | 0          |
| 3.0.0                | 2 (2.0%) | 1 (1.9%) | 0        | 0          | 0        | 0         | 0        | 0          |
| 4.1.1                | 0        | 1 (1.9%) | 0        | 0          | 0        | 0         | 0        | 0          |
| 4.3.1 (H58)          | 96 (97%) | 49 (91%) | 83 (57%) | 33 (23%)   | 4 (2.8%) | 19 (13%)  | 2 (1.4%) | 75 (51.7%) |
| <b>H58 subgroups</b> |          |          |          |            |          |           |          |            |
| EA1 (L1)             | 35 (35%) | 20 (37%) | 29 (53%) | 17 (31%)   | 4 (7.3%) | 2 (3.6%)  | 2 (3.6%) | 2 (3.6%)   |
| EA2 (L2)             | 46 (46%) | 27 (50%) | 54 (74%) | 0          | 0        | 0         | 0        | 73 (100%)  |
| EA3 (L2)             | 15 (15%) | 2 (3.7%) | 0        | 16 (94%)   | 0        | 17 (100%) | 0        | 0          |

309 Percentages indicate genotype frequencies amongst cases or controls (first two columns); or frequency of  
310 antimicrobial resistance determinants amongst isolates of a given genotype (remaining columns). MDR,  
311 multi-drug resistant; L1, lineage I; L2, lineage II.

312  
313  
314  
315 The few non-H58 isolates (**Table 2**) lacked any known AMR determinants. In contrast,  
316 the majority of H58 isolates were MDR (n=116, 80%), often carrying acquired genes  
317 conferring resistance to ampicillin (*bla*TEM-1), chloramphenicol (*catA1*), co-trimoxazole  
318 (*dfrA7* plus *sul1* and/or *sul2*) and streptomycin (*strAB*). In 33 genomes (23% of H58),  
319 these genes were carried by a Tn2670-like complex transposable element inserted in  
320 the chromosome as reported previously in the region <sup>12,13,15</sup>. The remaining 83 MDR  
321 genomes (57% of H58) carried a closely related Tn2670-like transposon located within  
322 an IncHI1 plasmid, which in all but one isolate also carried an additional tetracycline  
323 resistance gene (*tetB*). The IncHI1 plasmids were genotyped as plasmid sequence type  
324 6 (PST6), which is associated with MDR H58 in East Africa and South Asia <sup>12,15,50</sup>.  
325 Thus, the observed AMR phenotypes (n=128 H58 and n=8 non-H58 genome  
326 sequences) corresponded to the presence of known molecular determinants of AMR.  
327 Estimates of sensitivity and specificity of AMR genotyping are presented in **Table S5**

328 and **supplementary results**. No statistical association was observed between the  
329 presence of MDR genes or QRDR mutations shown in **Table 2** and case/control status,  
330 age, or sex.

331

### 332 **Local subpopulations of S. Typhi H58**

333 S. Typhi H58 (genotype 4.3.1) can be subdivided into lineages I (genotype 4.3.1.1) and  
334 II (genotype 4.3.1.2). Lineage II was more common in this setting than lineage I: n=90  
335 (62.1% of H58) vs n=55 (37.9%). Examination of the global phylogeny (**Fig. 2**, and  
336 online interactive version <https://microreact.org/project/wViqmaRdZuFVEb6yk4i1jU>)  
337 revealed all H58 lineage I isolates from this study shared a most recent common  
338 ancestor (mrca) whose descendants form a monophyletic clade that exclusively  
339 comprised S. Typhi from East African countries (see **Fig. 2**), here defined as H58  
340 sublineage EA1 (East Africa 1) with genotype designation 4.3.1.1.EA1 (labelled in **Fig.**  
341 **2**).

342

343 S. Typhi H58 lineage II (genotype 4.3.1.2) isolates from our study belonged to two  
344 distinct clades of the global phylogeny (**Fig. 2**), which were each exclusively populated  
345 by East African isolates. The largest of these clades (n=80 isolates, of which 81.3%  
346 derive from the current study) formed a monophyletic group nested within a deeper  
347 clade of diverse South Asian isolates (see **Fig. 2**), and corresponds to the previously  
348 reported introduction of H58 lineage II into Kenya from South Asia <sup>12</sup>. This lineage, here  
349 defined as H58 sublineage EA2 (East Africa 2) is designated genotype 4.3.1.2.EA2  
350 (labelled in **Fig. 2**). The smaller East African H58 lineage II clade (n=43 isolates) is



351 designated genotype 4.3.1.2.EA3 (labelled in **Fig. 2**) and comprised two sister clades,  
352 separated by  $\geq 13$  SNPs: one involving isolates from Kenya (n=13, all from this study)  
353 and the other isolates from Uganda (n=30), which accounted for 100% of the typhoid  
354 burden at the Ugandan site where they were identified (see **Fig. 2**). All three East  
355 African H58 genotypes have been added to the GenoTyphi scheme using unique  
356 marker SNPs and further details on these are provided in **supplementary results**.

357

358 The three East African H58 subgroups circulating in our setting all had high rates of  
359 MDR (84%, 74% and 94%, respectively); however, in EA2, MDR was exclusively  
360 associated with the PST6-IncHI1 plasmid, and in EA3 exclusively with the chromosomal  
361 insertion (see **Table 2, Fig. 2** and **supplementary results**). In EA1, most MDR was  
362 associated with the PST6-IncHI1 plasmid. However, a subclade of isolates (associated  
363 with spread to Tanzania and Malawi) carried the chromosomal insertion instead (see  
364 **Table 2, Fig. 2, supplementary methods**).

365

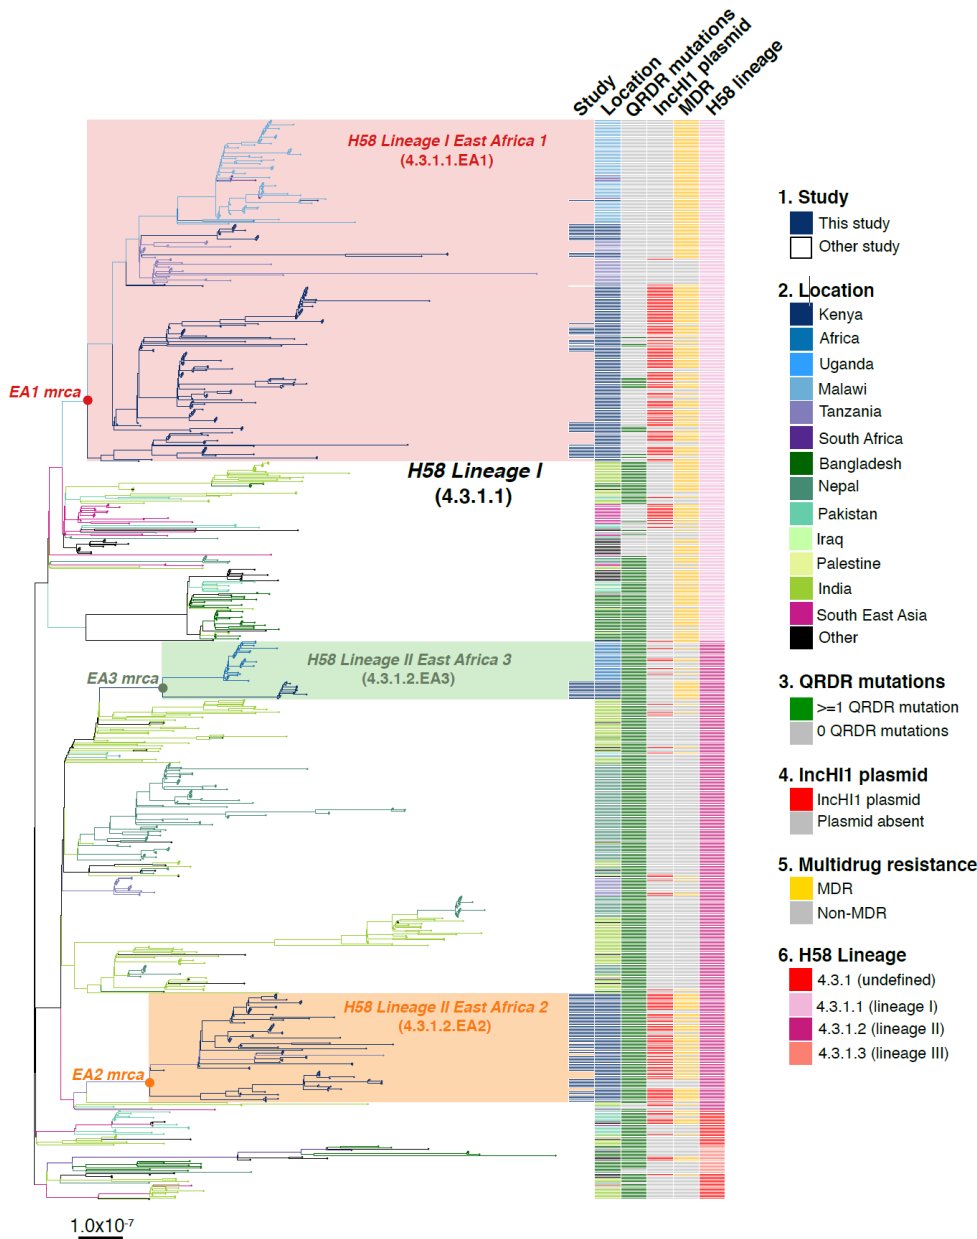

366  
367

368 **Fig. 2. Global population structure of H58 (4.3.1) S. Typhi showing Kenyan**  
 369 **isolates cluster into three East African clades.** Whole genome phylogeny of 1,204  
 370 H58 isolates, including all available Kenyan genomes (n=128 from this study, n=111  
 371 from prior studies) and globally distributed genomes for context (n=965, see **Methods**).  
 372 Branch lengths are in substitutions per core-genome site, branches are coloured to  
 373 indicate geographical origin (see inset legend), shaded boxes highlight the three East  
 374 African H58 clades defined in this study. Colour bars to the right indicate (as per inset  
 375 legend): 1, Kenyan strains isolated and sequenced during this study; 2, geographical  
 376 location; 3, mutation(s) in the quinolone resistance determining region (QRDR) of genes  
 377 *gyrA*, *gyrB*, and *parC*; 4, presence of multidrug resistance (MDR) IncHI1 plasmid; 5,  
 378 presence of MDR genes; 6, H58 lineage. Interactive version available at  
 379 <https://microreact.org/project/w/ViqmaRdZuFVEb6yk4i1jU>.

380 ***Distribution of S. Typhi genotypes amongst individuals***

381 No statistically significant differences in genotype distribution were observed between  
 382 cases and controls (p=0.077, using Chi-squared test, data in **Table 2**), or between  
 383 males and females (p=0.37, using Chi-squared test, data in **Table S6**), consistent with  
 384 symptomatic and asymptomatic infections being drawn from the same general  
 385 circulating pool of pathogens. The distribution of genotypes amongst cases varied by  
 386 age group (p=0.01, using Chi-square test), with the frequency of EA1 declining with age  
 387 and the overall diversity increasing with age (**Table 3**). No significant differences in age  
 388 groups was evident amongst controls (p=0.9 using Chi-square test, see **Table 3**).

389

390 **Table 3. S. Typhi genotypes associated with n=153 cases and controls among**  
 391 **different age groups**

|                               | Age group |           |           |
|-------------------------------|-----------|-----------|-----------|
|                               | ≤1 year   | 1-7 years | >7 years  |
| <b>WGS-confirmed cases</b>    | <b>7</b>  | <b>66</b> | <b>26</b> |
| EA1                           | 5 (71%)   | 24 (36%)  | 6 (23%)   |
| EA2                           | 1 (14%)   | 34 (52%)  | 11 (42%)  |
| EA3                           | 0         | 8 (12%)   | 7 (27%)   |
| non-H58                       | 1 (14%)   | 0         | 2 (78%)   |
| Shannon diversity             | 0.80      | 0.97      | 1.25      |
| <b>WGS-confirmed carriers</b> | <b>4</b>  | <b>30</b> | <b>20</b> |
| EA1                           | 1 (25%)   | 10 (33%)  | 9 (45%)   |
| EA2                           | 3 (75%)   | 16 (53%)  | 8 (40%)   |
| EA3                           | 0         | 1 (3%)    | 1 (5%)    |
| non-H58                       | 0         | 3 (10%)   | 2 (10%)   |
| Shannon diversity             | 0.56      | 1.05      | 1.11      |

392

393

394

395 ***Spatiotemporal distribution of S. Typhi cases and carriers***

396 We examined the spatial and temporal distribution of all *S. Typhi* isolates collected at  
397 the study clinics (see **methods; Fig. S1 and Table S7**), and the subset of 96 *S. Typhi*  
398 from cases and 67 from carriers living within the demographic surveillance site (DSS)  
399 (**Fig. 3 and Table 4**). A number of peaks in monthly *S. Typhi* case and carrier numbers  
400 are apparent in both cohorts (**Fig. 3 and Fig. S1**), with fewer cases and carriers  
401 observed in warmer months. Carrier counts remained relatively consistent throughout  
402 the study period. We tested for association between case or carrier peaks (>2 positives  
403 per month) and high rainfall or temperature in the same month, previous month, or two  
404 months prior to the month of observation (**Table 4, and Table S7**). For those *S. Typhi*  
405 from within the DSS, high temperatures were associated with lower case and carrier  
406 counts in the same month, and in the subsequent month ( $p < 0.05$ , using Fisher's exact  
407 test), however no associations between high rainfall and elevated case or carrier counts  
408 was observed.

409

410 GPS coordinates were available for  $n=139$  (55%) *S. Typhi* isolates, and we  
411 endeavoured to look for geographic hotspots suggestive of major point-source single-  
412 genotype outbreaks in the informal settlement. However, our data revealed that the  
413 three H58 genotypes and non-H58 genotypes were co-circulating throughout the study  
414 area, with no evidence of geographic restriction of specific genotypes (see **Fig. S2**).  
415 Further, we did not observe any spatially linked phylogenetic clusters of closely related  
416 sequences.

417

418 **Table 4. Climatic predictors of elevated case and control counts inside the DSS**

| <b>Typhoid Cases</b>                       |                    |                |                       |                |                       |                |
|--------------------------------------------|--------------------|----------------|-----------------------|----------------|-----------------------|----------------|
| <b>Month</b>                               | <b>Same month</b>  |                | <b>Previous month</b> |                | <b>2 months prior</b> |                |
|                                            | <b>OR (95% CI)</b> | <b>p-value</b> | <b>OR (95% CI)</b>    | <b>p-value</b> | <b>OR (95% CI)</b>    | <b>p-value</b> |
| <b>Rainfall (precipitation) &gt; 75 mm</b> | 0.21 (0.019-1.2)   | 0.079          | 1.4 (0.26-6.9)        | 0.73           | 3.7 (0.73-22.3)       | 0.08           |
| <b>Minimum temperature &gt;14°C</b>        | 0.21 (0.041-0.95)  | 0.025*         | 0.61 (0.14-2.6)       | 0.52           | 2.2 (0.49-10.5)       | 0.33           |
| <b>Maximum temperature &gt;26°C</b>        | 0.85 (0.20-3.6)    | 1              | 0.37 (0.080-1.6)      | 0.20           | 0.67 (0.15-2.80)      | 0.75           |
| <b>Asymptomatic Controls</b>               |                    |                |                       |                |                       |                |
| <b>Month</b>                               | <b>Same month</b>  |                | <b>Previous month</b> |                | <b>2 months prior</b> |                |
|                                            | <b>OR (95% CI)</b> | <b>p-value</b> | <b>OR (95% CI)</b>    | <b>p-value</b> | <b>OR (95% CI)</b>    | <b>p-value</b> |
| <b>Rainfall (precipitation) &gt; 75 mm</b> | 1.2 (0.21-6.5)     | 1              | 0.43 (0.038-2.7)      | 0.45           | 0.43 (0.038-2.7)      | 0.45           |
| <b>Minimum temperature &gt;14°C</b>        | 0.12 (0.016-0.64)  | 0.005*         | 0.41 (0.078-1.9)      | 0.30           | 0.65 (0.13-3.2)       | 0.73           |
| <b>Maximum temperature &gt;26°C</b>        | 0.10 (0.0090-0.61) | 0.005*         | 0.19 (0.027-1.0)      | 0.04*          | 0.63 (0.12-3.0)       | 0.73           |

419 Values in cells are odds ratios and p-values for Fisher's exact test between high case or control count (>2  
 420 per month) and high rainfall/temperature. \* highlights p-values <0.05.  
 421

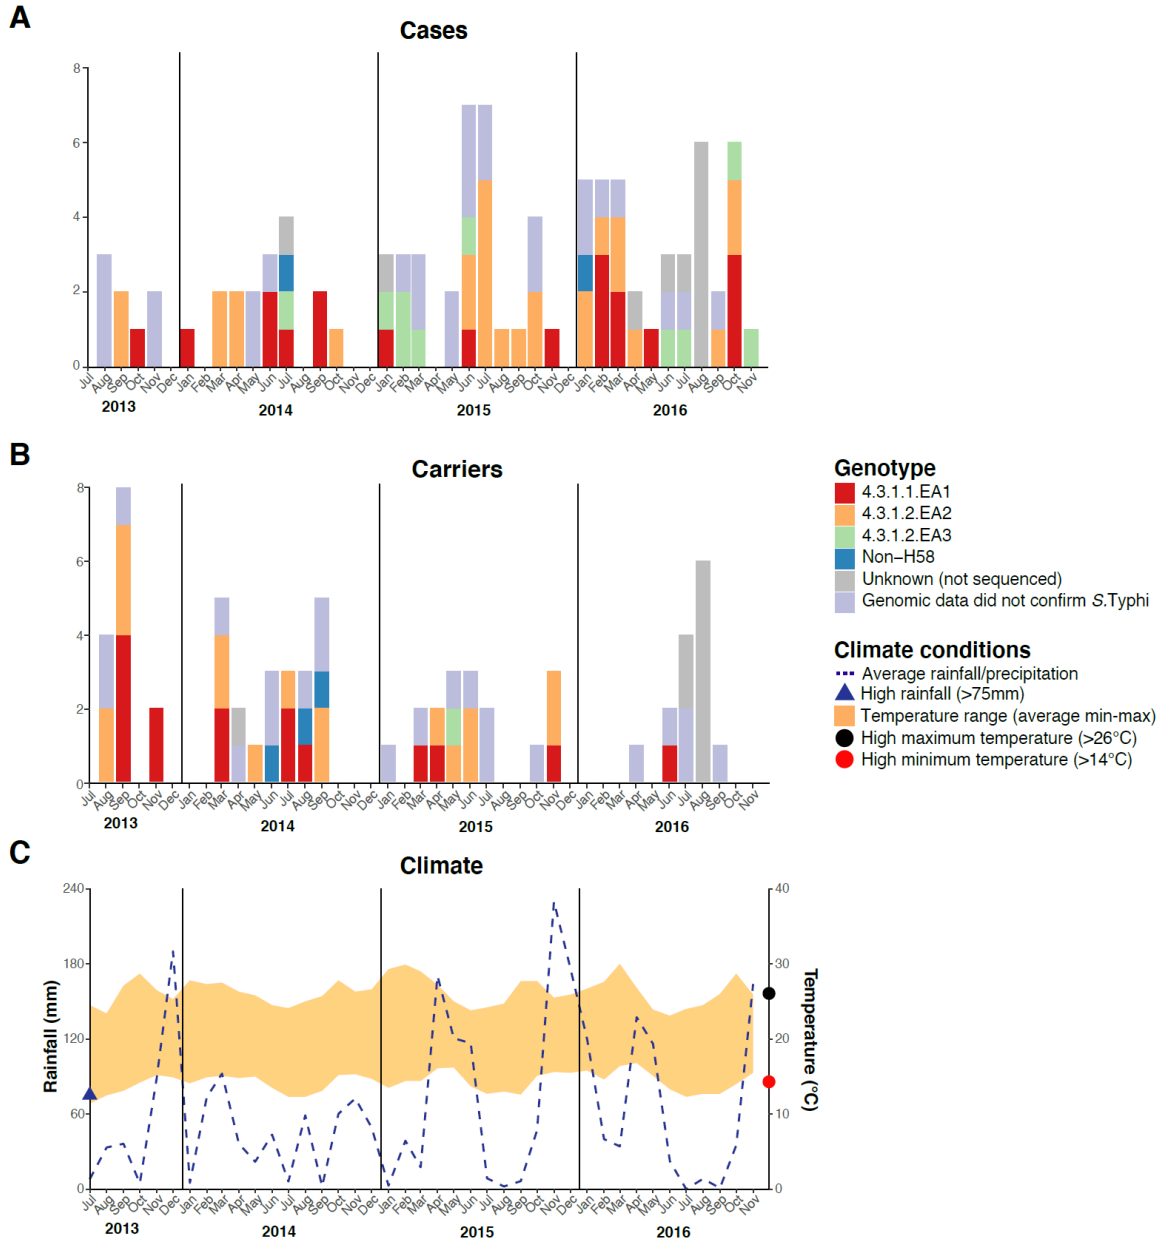

422  
423

424 **Figure 3. Epidemic curve of all *S. Typhi* cases and controls per month inside the**  
 425 **DSS.** (A) Monthly distribution of *S. Typhi* genotypes from cases. (B) Monthly distribution  
 426 of *S. Typhi* genotypes from carriers. Note that the counts include all participants who  
 427 were culture-positive for *S. Typhi* and also those who were culture-positive for other  
 428 *Salmonella* but identified later by WGS as *S. Typhi*. (C) Weather conditions throughout  
 429 the study period. Blue dashed line indicates precipitation level per month (rainfall),  
 430 shaded orange polygon indicates the temperature range, red circle indicates threshold  
 431 for high minimum temperature for statistical testing, black circle indicates threshold for  
 432 high maximum temperature for statistical testing, blue triangle indicates threshold for  
 433 high rainfall for statistical testing.

434

435 ***Evolutionary history of S. Typhi cases and controls***

436 We applied Bayesian phylodynamic analysis to all available Kenyan H58 genomes to  
437 estimate the dates of emergence of each of the East African lineages. The data showed  
438 temporal structure (see **methods** and **Fig. S3**), and we estimated a genome-wide  
439 substitution rate of 0.8 SNPs per genome per year (95% HPD, 0.1-1.0). This translates  
440 to a rate of  $1.9 \times 10^{-7}$  genome-wide substitutions per site per year (95% HPD =  $1.5 \times 10^{-7}$ -  
441  $2.2 \times 10^{-7}$ ). The novel EA1 isolates from this study (accounting for 35% of cases and 37%  
442 of controls) were intermingled with those sequenced previously from Kenya and were  
443 genetically diverse (median pairwise distance ~16 SNPs, interquartile range 12-27).  
444 This is indicative of a well-established EA1 *S. Typhi* population in Nairobi for which we  
445 estimate the mrca existed circa 1990 (95% HPD, 1981-1999) (see **Fig. 4a**). The most  
446 common lineage was EA2 (48%), which also showed extensive diversity and we  
447 estimate emerged circa 1988-1990 (95% HPD, 1978-1997) (see **Fig. 4a**), earlier than  
448 the first recorded H58 Lineage II isolation in Kenya in 2004<sup>14</sup>. We estimate the MDR  
449 fluoroquinolone non-susceptible lineage EA3, which accounts for just 11% of isolates,  
450 arrived much more recently (Kenyan mrca circa 2012, 95% HPD 2009-2014) (see **Fig.**  
451 **4a**). The topology of the global H58 tree (**Fig. 2**) supports South Asia as the most likely  
452 origin for EA3, with EA3 strains spreading between Kenya and Uganda, probably  
453 through the shared transport systems.

454

455 The Bayesian tree of Kenyan H58 isolates (**Fig. 4a**) shows intermingling of sequences  
456 from acute cases and asymptomatic carriers. Sequences from carriers appeared more  
457 deeply branched than those of cases (**Fig. 4a**), which we tested by comparing the

458 terminal branch lengths (estimated in units of time in the Bayesian phylogeny) and  
459 isolate-specific SNP counts, for high-quality H58 sequences from acute cases (n=85) vs  
460 those of asymptomatic carriers (n=43) (**Fig. 4b**). The mean values were higher for  
461 carriers vs cases (**Fig. 4b-c**), with the trend being more pronounced among samples  
462 from within the DSS (see **Fig. S4**), but these trends were not statistically significant  
463 (p=0.42 for unique SNPs and p=0.57 for terminal branches for all samples, using one-  
464 sided Wilcoxon rank sum test; p=0.051 for unique SNPs and p=0.58 for terminal  
465 branches in DSS). The mean number of non-synonymous (NS) mutations detected in  
466 terminal branches was greater for carrier isolates than those from cases, but again this  
467 difference was not statistically significant (0.72 vs 0.54 for all sequences, p=0.53 using  
468 Wilcox rank sum test; 0.81 vs. 0.39, p=0.20 inside the DSS; see **Fig. 4d** and **Fig. S4**).  
469 There was also no significant difference in terminal branch lengths or unique SNP  
470 counts between genomes carrying vs lacking MDR genes or QRDR mutations (data not  
471 shown).

472  
473 Examination of the location of terminal-branch NS mutations revealed that certain  
474 functional categories of genes carried more NS mutations arising on terminal branches  
475 associated with carriage samples vs those from acute cases (**Fig. 5, Fig. S5, and Table**  
476 **S8**). Notably, carriage samples were associated with significantly higher frequencies of  
477 terminal-branch NS mutations in genes responsible for the synthesis of surface  
478 polysaccharides and antigens (9.3% of carriers vs 1.2% of acute cases, p=0.043,  
479 Fisher's exact test). Notably, in the *viaB* operon (responsible for Vi capsule  
480 biosynthesis) we identified n=2/43 carriage isolates that harboured NS mutations (*tviD*-



481 R159C and *tviE*-P263S) compared with only n=1/85 case isolate (*tviB*-V1M); and in the  
482 *wba* cluster genes (responsible for O-antigen biosynthesis) we identified n=2/43  
483 carriage isolates that harboured NS mutations (*wza*-V137G and *wzc*-L26F) whilst  
484 none were detected among case samples (**Table S8**). Non-significant excesses of  
485 mutations in carriage isolates were also observed for pathogenicity-island related  
486 functions and for periplasmic and exported lipoproteins (**Fig 5**).  
487

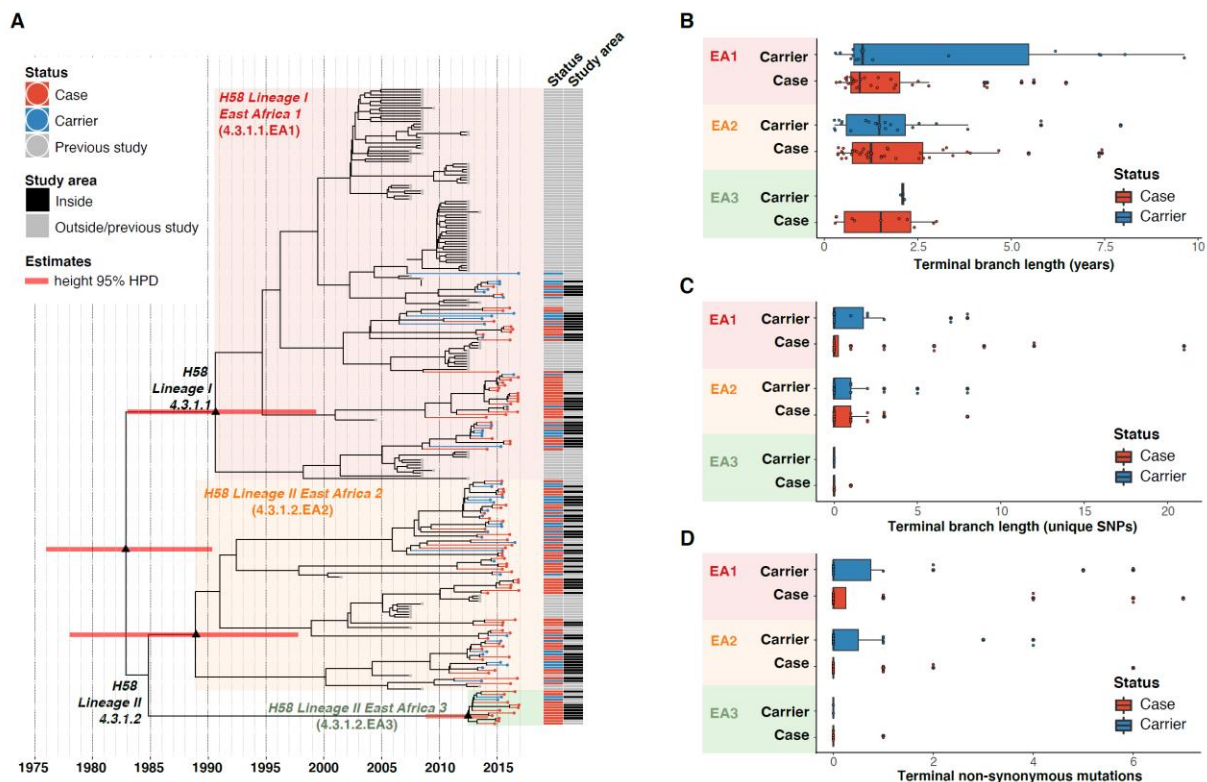

488

489 **Fig. 4. Temporal distribution of genotypes and among cases and carriers.** (A)  
490 Dated maximum-clade credibility phylogenetic tree of Kenyan *S. Typhi* genotype 4.3.1  
491 (H58), including 128 isolated from this study. Tip colours & first colour bar indicate  
492 symptom status, second colour bar indicates those isolates from children living in the  
493 defined survey area. Black triangles demarcate nodes of interest, and the  
494 accompanying bars indicate 95% HPD of node heights. Interactive phylogeny available  
495 at <https://microreact.org/project/I2KUoasUB>. (B) Distribution of terminal branch lengths  
496 for all sequences, extracted from the Bayesian tree shown in (A). (C) Distribution of  
497 isolate-specific SNPs detected in sequences from all cases and controls. (D)  
498 Distribution of terminal non-synonymous mutations detected in sequences from all

499 cases and controls. In the boxplots in panels B, C, and D, black bars indicate median  
500 values, boxes indicate interquartile range. Cases and carrier samples indicated as per  
501 the inset legend.

502  
503

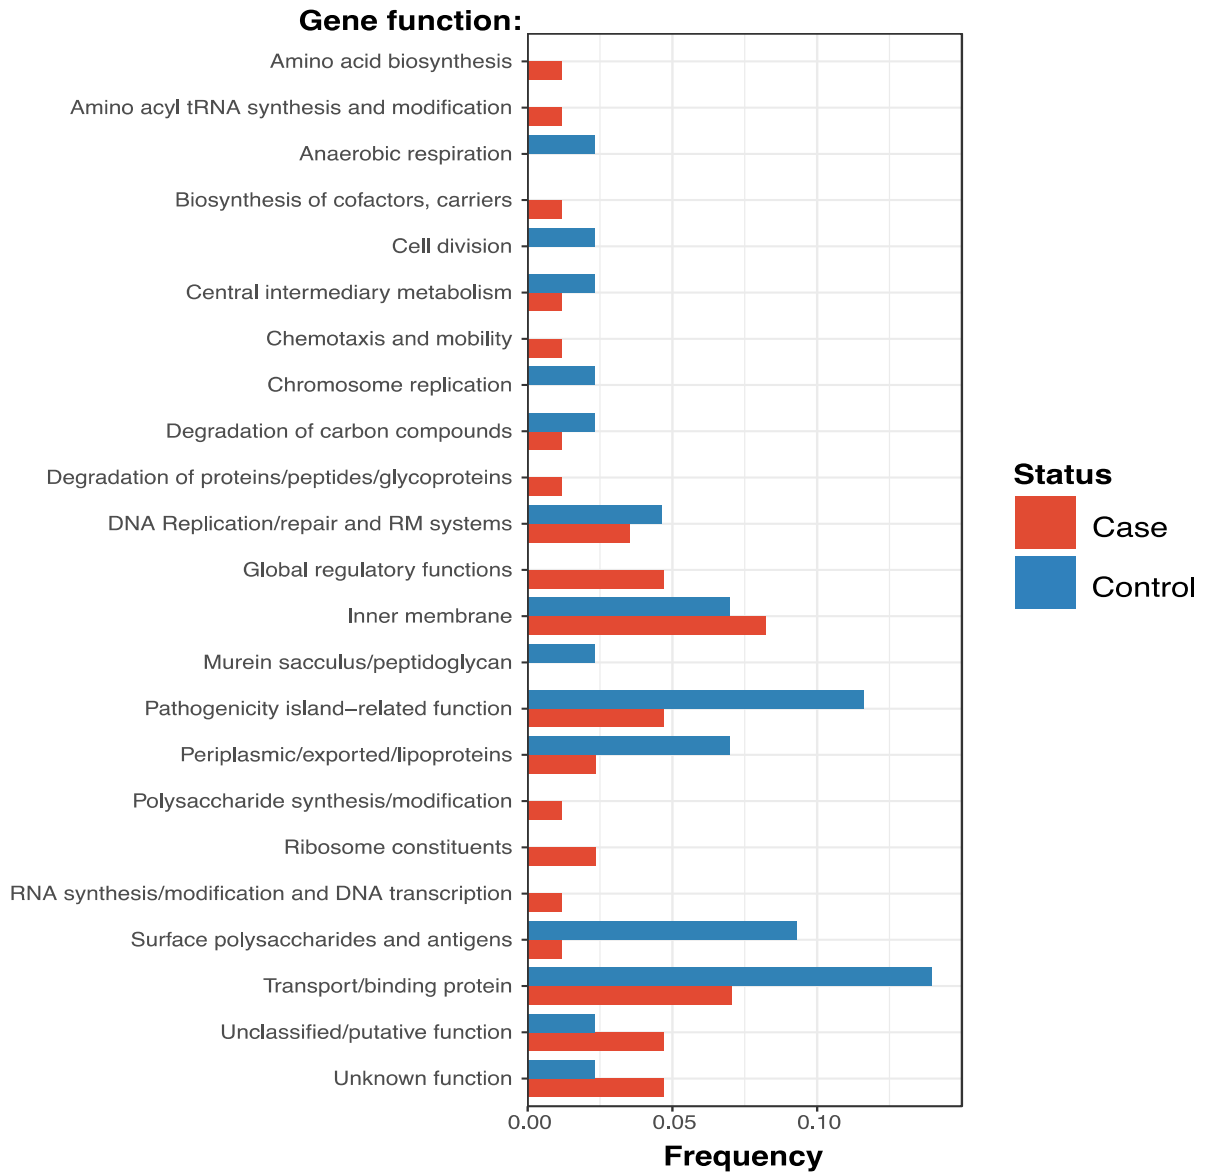

504  
505  
506  
507  
508  
509  
510  
511

**Fig. 5. Frequency of terminal non-synonymous mutations in difference gene functional categories among cases and carriers.** Frequency of terminal non-synonymous mutations in all sequences. Red bars indicate the frequency non-synonymous mutations found in acute case samples, and blue bars indicate the frequency of mutations found in carrier samples.

## 512 **Discussion**

513 In this case-control typhoid surveillance study, we observed an asymptomatic *S. Typhi*  
514 carriage rate of 1.1% among children aged 16 years and under from an informal  
515 settlement with endemic Water, Sanitation, and Hygiene (WaSH) related enteric  
516 diseases<sup>25,30,51</sup>. To our knowledge, there has not been systematic surveillance for  
517 typhoid carriage in communities in Africa, but globally carriage and shedding of *S. Typhi*  
518 has mostly been associated with older age groups<sup>6,52,53</sup>. Our data highlights a role for  
519 paediatric carriage, revealing a lower percentage of carriers amongst infants  $\leq 1$  year of  
520 age (0.62%), increasing to 1.2% in children between 7 and 16 years (**Table S4**). Thus,  
521 carriage and shedding, especially among school age children, is likely an important  
522 factor in the onward transmission of typhoid in this setting<sup>25</sup>. Symptomatic typhoid  
523 fever is common in school age children, with a case culture positive rate of 4.3% among  
524 febrile children 7 to 16 years of age, though our data shows that there is also a  
525 substantial burden among younger children 1 to 7 years of age, and infants up to 1 year  
526 of age, with culture positive rates among febrile participants of 3.1% and 2.2%,  
527 respectively (**Table S4**).

528

529 We previously noted a dominance of MDR H58 *S. Typhi* over the last decade,  
530 essentially replacing the antimicrobial susceptible genotypes that dominated in the  
531 1980-1990s<sup>54</sup>. The *S. Typhi* circulating in the informal settlement in the present study  
532 are largely comprised of descendants of the previously observed H58 sublineages  
533 4.3.1.EA1 (36%) and 4.3.1.2.EA2 (48%)<sup>12,15</sup>. Both EA1 and EA2 appear to be long  
534 established genotypes, with the mrca of EA1 existing circa 1990 (95% HPD, 1981-1999)

535 (see **Fig. 4a**), consistent with the earliest recorded detection of H58 Lineage I in Kenya  
536 in 1988<sup>14</sup>. Similarly we predict that the mrca of EA2 existed circa 1988-1990 (95%  
537 HPD, 1978-1997) (see **Fig. 4a**), earlier than the first recorded H58 Lineage II isolation in  
538 Kenya in 2004<sup>14</sup>. Our data thus support contemporaneous imports of EA1 and EA2 in  
539 the late 1980s or early 1990s, shortly after the emergence of H58 in South Asia<sup>12</sup> (circa  
540 1982, 95% HPD 1974-1990), and show that both lineages have persisted and  
541 diversified locally alongside one another in the intervening decades. H58 sublineage  
542 EA3 was introduced later (we estimate that the Kenyan mrca existed circa ~2012 (95%  
543 HPD 2009 to 2014)), and consistent with this the lineage displays less diversity and  
544 accounts for a smaller fraction of cases and controls (11%). The topology of our global  
545 phylogeny (**Fig. 2**) suggests that South Asia is the most likely origin of EA3 (as it is for  
546 EA1 and EA2), and that EA3 appears to have spread between Uganda and Kenya. This  
547 in line with multiple reports<sup>13,15</sup> of H58 strains spreading through East Africa, mainly  
548 arising from intracontinental and transcontinental travel and concomitant risk factors  
549 associated with WASH conditions.

550

551 The sublineages of *S. Typhi* H58 in Kenya exhibit different antibiotic resistance profiles  
552 (**Fig. 2, Table 2**). Notably, EA1 has a large Kenyan sublineage of MDR strains with  
553 IncHI1 plasmids<sup>12,15</sup> (which are commonly associated with outbreaks in East Africa and  
554 Asia<sup>12,15,50</sup>) but also a Kenyan sublineage with chromosomally integrated MDR.  
555 Chromosomal integration of MDR has not previously been reported in *S. Typhi* from  
556 Kenya (see **supplementary data**), but has been reported in Malawi and Tanzania<sup>121</sup>  
557 and our new data suggests that the variant may have been transferred to these

558 locations from Kenya (see **Figure 2**). MDR H58 isolates are now widespread across  
559 East Africa, having been detected in Malawi, Uganda, Rwanda, Tanzania and  
560 Mozambique <sup>12,13,15,33,55</sup>.

561  
562 The three East African lineages differed markedly in their patterns of mutations  
563 conferring Decreased Ciprofloxacin Susceptibility (DCS). GyrB-S464F was conserved  
564 among all EA2, whereas all EA3 isolates carried the GyrA-S83Y mutation. The GyrA-  
565 S464F mutation was also detected at low frequency in EA1 (**Table 2**). This data  
566 indicates that ciprofloxacin resistance has been selected independently multiple times  
567 and is ongoing. Increasing rates of ciprofloxacin resistance have also been observed  
568 following similar introductions of H58 elsewhere in East Africa <sup>15</sup>, and likely reflect a  
569 change in treatment practise following widespread dissemination of MDR *S. Typhi*  
570 elsewhere including South and Southeast Asia <sup>34,56,57</sup>.

571  
572 The different *S. Typhi* lineages appeared to be fairly evenly distributed between both  
573 acute cases and carriers, with the most common subgroup (EA2) accounting for 46% of  
574 acute cases and 50% of carriers. Similarly, all *S. Typhi* genotypes were identified  
575 throughout the study period and spatially across the study site, with most case/carrier  
576 monthly counts and geographic regions containing a diversity of genotypes (**Fig. 3 and**  
577 **Fig. S2**). Our data therefore provides no evidence for major point-source single-  
578 genotype outbreaks, but is consistent with persistent contamination of water supplies  
579 with multiple *S. Typhi* genotypes. Higher temperatures were associated with lower *S.*  
580 *Typhi* case and carrier counts, however, no association with high rainfall was observed.

581 These findings are in line with previous studies focusing on seasonal trends in nearby  
582 Kibera<sup>23</sup>. However they contrast with trends previously observed in other settings  
583 including Malawi, where higher temperatures and rainfall were associated with  
584 increased risk of disease albeit with a time lag of multiple months<sup>58</sup>, and South Asia<sup>59-</sup>  
585 <sup>61</sup>.

586  
587 In our phylogenetic trees, branch lengths and SNP counts are measures of evolutionary  
588 time, and their terminal or isolate-specific quantities represent an upper bound on the  
589 time since acquisition of the infection from which each isolate was sampled. Hence, our  
590 data suggest that the *S. Typhi* isolated from asymptomatic controls may have had, on  
591 average, a longer duration from acquisition of the infection to sampling in the clinic. This  
592 supports the interpretation that *S. Typhi*-positive controls identified in this study  
593 represent genuine medium- to long-term typhoid carriers, rather than simply reflecting  
594 transient presence in the gut. The greater diversity observed here amongst controls  
595 (**Table 2**) further supports this interpretation. Longer branch lengths among carrier  
596 samples were also observed in a recent study<sup>8</sup> of *S. Typhi* isolated from bile samples  
597 from the gallbladders of cholecystectomy patients in Nepal. The differences in terminal  
598 branch lengths were non-significant in our study, possibly reflecting low statistical power  
599 or, perhaps less likely, that our control data constitute a mix of multiple carriage types  
600 including convalescent (three weeks to three months), temporary (three to twelve  
601 months), and chronic (more than one year) carriers. Also in line with previous findings<sup>8</sup>,  
602 our analyses provide evidence of positive selection among carriage isolates, with a  
603 higher proportion of non-synonymous mutations detected among carriers in specific

604 biological pathways including surface polysaccharides and antigens, transport/binding  
605 proteins, pathogenicity, and anaerobic respiration (**Fig. 5, Fig S5, Table S8**). This is  
606 exemplified in the genes encoding surface antigens, notably those responsible for  
607 biosynthesis of Vi capsule and O-antigen lipopolysaccharide.

608

609 Our study is not without limitations, firstly, our data are from a single informal settlement  
610 community in Nairobi, and thus may not be representative of the overall population  
611 structure and AMR patterns of typhoid in Kenya more broadly, or in older age groups.  
612 Similarly, our sample size yielded a relatively small number of isolates for WGS, and we  
613 thus lack statistical power for some genetic analyses.

614

## 615 **Conclusion**

616 Our study is the first case-control study to identify and sequence both typhoid carriers  
617 and cases contemporaneously in an endemic community setting. High rates of AMR  
618 among both infection types in Kenya combined with high carriage and case rates,  
619 especially in the younger age groups, highlight the need for enhanced AMR and  
620 genomic surveillance in this region to inform both treatment guidelines and control  
621 strategies that keep pace with the local evolution and spread of AMR. Intervention  
622 strategies are urgently needed including the introduction of the new Vi conjugate  
623 vaccine in a programme that includes targeting of paediatric age groups in the short  
624 term, and improvements to WaSH infrastructure in the long term.

625

626

627 **Funding**

628 Research reported in this publication was supported by the National Institute of Allergy  
629 and Infectious Diseases of the National Institutes of Health under Award Number  
630 R01AI099525 to S.K. and the Wellcome Trust. ZAD was supported by a grant funded by  
631 the Wellcome Trust (STRATAA; 106158/Z/14/Z and TyVac), and received funding from  
632 the European Union's Horizon 2020 research and innovation programme under the  
633 Marie Skłodowska-Curie grant agreement TyphiNET No 845681. GD was supported by  
634 the Cambridge Biomedical Research Council NIHR AMR theme. KEH was supported by  
635 a Senior Medical Research Fellowship from the Viertel Foundation of Australia, and the  
636 Bill and Melinda Gates Foundation, Seattle (grant #OPP1175797).

637

638 **Author contributions**

639 SK, GD, JC and MA designed the project. ZAD, SD, KEH performed bioinformatic  
640 analysis of the *S. Typhi* genomes. CM, SA, NG and BO performed field work and  
641 patient recruitment and sampling, RN, CW, SRO and SMK performed laboratory sample  
642 processing and microbiological data analysis. SK, ZAD, KEH and GD wrote the  
643 manuscript. All authors contributed to the manuscript editing.

644

645 **Competing interests**

646 The authors declare no competing interests.

647

648 **Additional information**

649 Correspondence and requests for materials should be addressed to SK.



## 650 References

- 651 1 Crump JA, Mintz ED. Global trends in typhoid and paratyphoid Fever. *Clin Infect*  
652 *Dis* 2010; **50**: 241–6.
- 653 2 Mogasale V, Maskery B, Ochiai RL, *et al.* Burden of typhoid fever in low-income  
654 and middle-income countries: a systematic, literature-based update with risk-factor  
655 adjustment. *Lancet Glob Health* 2014; **2**: e570–80.
- 656 3 Hopewell MR, Graham JP. Trends in access to water supply and sanitation in 31  
657 major sub-Saharan African cities: an analysis of DHS data from 2000 to 2012. *BMC*  
658 *Public Health* 2014; **14**: 208–12.
- 659 4 Marchello CS, Hong CY, Crump JA. Global Typhoid Fever Incidence: A Systematic  
660 Review and Meta-analysis. *Clin Infect Dis* 2019; **68**: S105–16.
- 661 5 Marchello CS, Birkhold M, Crump JA. Complications and mortality of typhoid fever:  
662 A global systematic review and meta-analysis. *J Infect* 2020; **81**: 902–10.
- 663 6 Levine MM, Black RE, Lanata C. Precise estimation of the numbers of chronic  
664 carriers of *Salmonella typhi* in Santiago, Chile, an endemic area. *J Infect Dis* 1982;  
665 **146**: 724–6.
- 666 7 Parry CM, Hien TT, Dougan G, White NJ, Farrar JJ. Typhoid fever. *N Engl J Med*  
667 2002; **347**: 1770–82.
- 668 8 Thanh DP, Thieu NTV, Nguyen Thi Nguyen T, *et al.* Gallbladder carriage generates  
669 genetic variation and genome degradation in *Salmonella Typhi*. *PLoS Pathog* 2020;  
670 **16**: e1008998.
- 671 9 Gauld JS, Hu H, Klein DJ, Levine MM. Typhoid fever in Santiago, Chile: Insights  
672 from a mathematical model utilizing venerable archived data from a successful  
673 disease control program. *PLoS Negl Trop Dis* 2018; **12**: e0006759.
- 674 10 Pitzer VE, Feasey NA, Msefula C, *et al.* Mathematical Modeling to Assess the  
675 Drivers of the Recent Emergence of Typhoid Fever in Blantyre, Malawi. *Clin Infect*  
676 *Dis* 2015; **61 Suppl 4**: S251–8.
- 677 11 Saad NJ, Bowles CC, Grenfell BT, *et al.* The impact of migration and antimicrobial  
678 resistance on the transmission dynamics of typhoid fever in Kathmandu, Nepal: A  
679 mathematical modelling study. *PLoS Negl Trop Dis* 2017; **11**: e0005547.
- 680 12 Wong VK, Baker S, Pickard DJ, *et al.* Phylogeographical analysis of the dominant  
681 multidrug-resistant H58 clade of *Salmonella Typhi* identifies inter- and  
682 intracontinental transmission events. *Nat Genet* 2015; **47**: 632–9.

- 683 13 Feasey NA, Gaskell K, Wong V, *et al.* Rapid emergence of multidrug resistant,  
684 H58-lineage *Salmonella typhi* in Blantyre, Malawi. *PLoS Negl Trop Dis* 2015; **9**:  
685 e0003748.
- 686 14 Kariuki S, Revathi G, Kiiru J, *et al.* Typhoid in Kenya is associated with a dominant  
687 multidrug-resistant *Salmonella enterica* serovar Typhi haplotype that is also  
688 widespread in Southeast Asia. *J Clin Microbiol* 2010; **48**: 2171–6.
- 689 15 Park SE, Pham DT, Boinett C, *et al.* The phylogeography and incidence of multi-  
690 drug resistant typhoid fever in sub-Saharan Africa. *Nat Commun* 2018; **9**: 5094.
- 691 16 Klemm EJ, Shakoor S, Page AJ, *et al.* Emergence of an Extensively Drug-  
692 Resistant *Salmonella enterica* Serovar Typhi Clone Harboring a Promiscuous  
693 Plasmid Encoding Resistance to Fluoroquinolones and Third-Generation  
694 Cephalosporins. *mBio* 2018; **9**: 346–344.
- 695 17 Hendriksen RS, Leekitcharoenphon P, Mikoleit M, *et al.* Genomic dissection of  
696 travel-associated extended-spectrum-beta-lactamase-producing *Salmonella*  
697 *enterica* serovar typhi isolates originating from the Philippines: a one-off occurrence  
698 or a threat to effective treatment of typhoid fever? *J Clin Microbiol* 2015; **53**: 677–  
699 80.
- 700 18 Lutterloh E, Likaka A, Sejvar J, *et al.* Multidrug-resistant typhoid fever with  
701 neurologic findings on the Malawi-Mozambique border. *Clin Infect Dis* 2012; **54**:  
702 1100–6.
- 703 19 Marks F, Kalckreuth von V, Aaby P, *et al.* Incidence of invasive salmonella disease  
704 in sub-Saharan Africa: a multicentre population-based surveillance study. *Lancet*  
705 *Glob Health* 2017; **5**: e310–23.
- 706 20 Neil KP, Sodha SV, Lukwago L, *et al.* A large outbreak of typhoid fever associated  
707 with a high rate of intestinal perforation in Kasese District, Uganda, 2008-2009. *Clin*  
708 *Infect Dis* 2012; **54**: 1091–9.
- 709 21 Kyobutungi C, Ziraba AK, Ezech A, Yé Y. The burden of disease profile of residents  
710 of Nairobi's slums: results from a demographic surveillance system. *Popul Health*  
711 *Metr* 2008; **6**: 1.
- 712 22 Mberu BU, Haregu TN, Kyobutungi C, Ezech AC. Health and health-related  
713 indicators in slum, rural, and urban communities: a comparative analysis. *Glob*  
714 *Health Action* 2016; **9**: 33163.
- 715 23 Breiman RF, Cosmas L, Njuguna H, *et al.* Population-based incidence of typhoid  
716 fever in an urban informal settlement and a rural area in Kenya: implications for  
717 typhoid vaccine use in Africa. *PLoS ONE* 2012; **7**: e29119.

- 718 24 Mutai WC, Muigai AWT, Waiyaki P, Kariuki S. Multi-drug resistant Salmonella  
719 enterica serovar Typhi isolates with reduced susceptibility to ciprofloxacin in Kenya.  
720 *BMC Microbiol* 2018; **18**: 187–5.
- 721 25 Mbae C, Mwangi M, Gitau N, *et al.* Factors associated with occurrence of  
722 salmonellosis among children living in Mukuru slum, an urban informal settlement  
723 in Kenya. *BMC Infect Dis* 2020; **20**: 422.
- 724 26 KNBS KNBOS. Kenya population and housing census 2009. 2009.
- 725 27 Olack B, Burke H, Cosmas L, *et al.* Nutritional status of under-five children living in  
726 an informal urban settlement in Nairobi, Kenya. *J Health Popul Nutr* 2011; **29**: 357–  
727 63.
- 728 28 Mutisya E, Yarime M. Understanding the Grassroots Dynamics of Slums in Nairobi:  
729 The Dilemma of Kibera Informal Settlements. *Int Trans J Eng Manag Appl Sci*  
730 *Technol* 2011; **2**: 1–18.
- 731 29 Tinline RR, Gregory D. The Universal Transverse Mercator Code: A location code  
732 for disease reporting. *Can Vet J* 1988; **29**: 825–9.
- 733 30 Kariuki S, Mbae C, Van Puyvelde S, *et al.* High relatedness of invasive multi-drug  
734 resistant non-typhoidal Salmonella genotypes among patients and asymptomatic  
735 carriers in endemic informal settlements in Kenya. *PLoS Negl Trop Dis* 2020; **14**:  
736 e0008440.
- 737 31 Patel JB, Cockerill FR, Bradford PA. Performance standards for antimicrobial  
738 susceptibility testing: twenty-fifth informational supplement. 2015.
- 739 32 Parkhill J, Dougan G, James KD, *et al.* Complete genome sequence of a multiple  
740 drug resistant Salmonella enterica serovar Typhi CT18. *Nature* 2001; **413**: 848–52.
- 741 33 Wong VK, Baker S, Connor TR, *et al.* An extended genotyping framework for  
742 Salmonella enterica serovar Typhi, the cause of human typhoid. *Nat Commun*  
743 2016; **7**: 12827.
- 744 34 Britto CD, Dyson ZA, Duchene S, *et al.* Laboratory and molecular surveillance of  
745 paediatric typhoidal Salmonella in Nepal: Antimicrobial resistance and implications  
746 for vaccine policy. *PLoS Negl Trop Dis* 2018; **12**: e0006408.
- 747 35 Pham Thanh D, Karkey A, Dongol S, *et al.* A novel ciprofloxacin-resistant subclade  
748 of H58 Salmonella Typhi is associated with fluoroquinolone treatment failure. *Elife*  
749 2016; **5**: e14003.
- 750 36 Croucher NJ, Page AJ, Connor TR, *et al.* Rapid phylogenetic analysis of large  
751 samples of recombinant bacterial whole genome sequences using Gubbins.  
752 *Nucleic Acids Res* 2015; **43**: e15–5.

- 753 37 Stamatakis A. RAxML version 8: a tool for phylogenetic analysis and post-analysis  
754 of large phylogenies. *Bioinformatics* 2014; **30**: 1312–3.
- 755 38 Argimon S, Abudahab K, Goater RJE, *et al.* Microreact: visualizing and sharing  
756 data for genomic epidemiology and phylogeography. *Microb Genom* 2016; **2**:  
757 e000093.
- 758 39 Paradis E, Claude J, Strimmer K. APE: Analyses of Phylogenetics and Evolution in  
759 R language. *Bioinformatics* 2004; **20**: 289–90.
- 760 40 Yu G, Smith DK, Zhu H, Guan Y, Lam TT-Y. ggtree: an rpackage for visualization  
761 and annotation of phylogenetic trees with their covariates and other associated  
762 data. *Methods Ecol Evol* 2016; **8**: 28–36.
- 763 41 Edwards DJ, Duchêne S, Pope B, Holt KE. SNPPar: identifying convergent  
764 evolution and other homoplasies from microbial whole-genome alignments. *bioRxiv*  
765 DOI:10.1101/2020.07.08.194480.
- 766 42 Rambaut A, Lam TT, Max Carvalho L, Pybus OG. Exploring the temporal structure  
767 of heterochronous sequences using TempEst (formerly Path-O-Gen). *Virus Evol*  
768 2016; **2**: vew007.
- 769 43 Suchard MA, Lemey P, Baele G, Ayres DL, Drummond AJ, Rambaut A. Bayesian  
770 phylogenetic and phylodynamic data integration using BEAST 1.10. *Virus Evol*  
771 2018; **4**: vey016.
- 772 44 Inouye M, Dashnow H, Raven L-A, *et al.* SRST2: Rapid genomic surveillance for  
773 public health and hospital microbiology labs. *Genome Med* 2014; **6**: 90.
- 774 45 Carattoli A, Zankari E, García-Fernández A, *et al.* In silico detection and typing of  
775 plasmids using PlasmidFinder and plasmid multilocus sequence typing. *Antimicrob*  
776 *Agents Chemother* 2014; **58**: 3895–903.
- 777 46 Gupta SK, Padmanabhan BR, Diene SM, *et al.* ARG-ANNOT, a new bioinformatic  
778 tool to discover antibiotic resistance genes in bacterial genomes. *Antimicrob Agents*  
779 *Chemother* 2014; **58**: 212–20.
- 780 47 Wick RR, Judd LM, Gorrie CL, Holt KE. Unicycler: Resolving bacterial genome  
781 assemblies from short and long sequencing reads. *PLoS Comput Biol* 2017; **13**:  
782 e1005595.
- 783 48 Wick RR, Schultz MB, Zobel J, Holt KE. Bandage: interactive visualization of de  
784 novo genome assemblies. *Bioinformatics* 2015; **31**: 3350–2.
- 785 49 Hawkey J, Hamidian M, Wick RR, *et al.* ISMapper: identifying transposase insertion  
786 sites in bacterial genomes from short read sequence data. *BMC Genomics* 2015;  
787 **16**: 667–11.

- 788 50 Holt KE, Phan M-D, Baker S, *et al.* Emergence of a globally dominant IncHI1  
789 plasmid type associated with multiple drug resistant typhoid. *PLoS Negl Trop Dis*  
790 2011; **5**: e1245.
- 791 51 Kariuki S, Mbae C, Onsare R, *et al.* Multidrug-resistant Nontyphoidal Salmonella  
792 Hotspots as Targets for Vaccine Use in Management of Infections in Endemic  
793 Settings. *Clin Infect Dis* 2019; **68**: S10–5.
- 794 52 Senthilkumar B, Senbagam D, Rajasekarapandian M. An epidemiological  
795 surveillance of asymptomatic typhoid carriers associated in respect to  
796 socioeconomic status in India. *J Public Health* 2012; **22**: 297–301.
- 797 53 Gunn JS, Marshall JM, Baker S, Dongol S, Charles RC, Ryan ET. Salmonella  
798 chronic carriage: epidemiology, diagnosis, and gallbladder persistence. *Trends*  
799 *Microbiol* 2014; **22**: 648–55.
- 800 54 Kariuki S, Gordon MA, Feasey N, Parry CM. Antimicrobial resistance and  
801 management of invasive Salmonella disease. *Vaccine* 2015; **33 Suppl 3**: C21–9.
- 802 55 Ingle DJ, Nair S, Hartman H, *et al.* Informal genomic surveillance of regional  
803 distribution of Salmonella Typhi genotypes and antimicrobial resistance via  
804 returning travellers. *PLoS Negl Trop Dis* 2019; **13**: e0007620.
- 805 56 Britto CD, Dyson ZA, Mathias S, *et al.* Persistent circulation of a fluoroquinolone-  
806 resistant Salmonella enterica Typhi clone in the Indian subcontinent. *J Antimicrob*  
807 *Chemother* 2020; **75**: 337–41.
- 808 57 Rahman SIA, Dyson ZA, Klemm EJ, *et al.* Population structure and antimicrobial  
809 resistance patterns of Salmonella Typhi isolates in urban Dhaka, Bangladesh from  
810 2004 to 2016. *PLoS Negl Trop Dis* 2020; **14**: e0008036.
- 811 58 Thindwa D, Chipeta MG, Henrion MYR, Gordon MA. Distinct climate influences on  
812 the risk of typhoid compared to invasive non-typhoid Salmonella disease in  
813 Blantyre, Malawi. *Sci Rep* 2019; **9**: 20310–1.
- 814 59 Baker S, Holt KE, Clements ACA, *et al.* Combined high-resolution genotyping and  
815 geospatial analysis reveals modes of endemic urban typhoid fever transmission.  
816 *Open Biol* 2011; **1**: 110008.
- 817 60 Dewan AM, Corner R, Hashizume M, Ongee ET. Typhoid Fever and its association  
818 with environmental factors in the Dhaka Metropolitan Area of Bangladesh: a spatial  
819 and time-series approach. *PLoS Negl Trop Dis* 2013; **7**: e1998.
- 820 61 Kanungo S, Dutta S, Sur D. Epidemiology of typhoid and paratyphoid fever in India.  
821 *J Infect Dev Ctries* 2008; **2**: 454–60.

822

823 **SUPPLEMENTARY MATERIAL**

824 **Supplementary methods**

825 ***Phylogenetic and SNP analysis of S. Typhi isolates***

826 For SNP analysis, paired-end reads from 153 *S. Typhi* isolates were mapped to the  
827 reference sequence of *S. Typhi* CT18 (accession number: AL513382) <sup>1</sup> using the  
828 RedDog mapping pipeline (v1beta.10.3), available at <http://github.com/katholt/reddog>.  
829 Briefly, RedDog uses Bowtie (v2.2.3) <sup>2</sup> to map reads to the reference sequence;  
830 SAMtools (v0.1.19) <sup>3</sup> to identify SNPs with phred quality scores above 30; filter out  
831 SNPs supported by <5 reads, or with >2.5 times the genome-wide average read depth  
832 (representing putative repeated sequences), or with ambiguous (heterozygous)  
833 consensus base calls. For each SNP position that passed these criteria in any one  
834 isolate, consensus base calls (i.e. alleles) for that position were extracted from all  
835 genomes, and used to construct an alignment of alleles across all SNP sites.  
836 Ambiguous base calls and those with phred quality <20 were treated as unknown alleles  
837 and represented with a gap character in the SNP alignment. Read alignments were  
838 used to assign isolates to previously defined lineages according to the *S. Typhi*  
839 extended genotyping framework <sup>4-6</sup>, by subjecting the alignments (BAM format) to  
840 analysis with the GenoTyphi pipeline (available at <http://github.com/katholt/genotyphi>).  
841 Unique SNPs defining three novel lineages were identified from the genome-wide SNP  
842 allele table (with SNPs responsible for non-synonymous mutations in highly conserved  
843 genes without deletions prioritized for lineage definitions), these were added to the  
844 GenoTyphi scheme to facilitate easy identification of these lineages in future studies.

845

846 Phylogenetic analyses were restricted to WGS-confirmed pure cultures of *S. Typhi* H58  
847 (genotype 4.3.1, n=128). For some analyses, an additional 1,076 *S. Typhi* H58  
848 genomes from previously published WGS studies of global and African isolates <sup>4,7-9</sup>  
849 were also included for context (using the same mapping approach detailed above).  
850 Alleles from 61 additional *S. Typhi* genomes representing all non-H58 subclades (listed  
851 in **Table S2**), and *S. Paratyphi* A str. AKU\_12601 (accession FM200053) <sup>10</sup>, were also  
852 included in the phylogenetic analysis as outgroups for tree rooting. SNPs called in  
853 phage regions or repetitive sequences (354 kbp; ~7.4% of bases in the CT18 reference  
854 chromosome, as defined previously <sup>7,11,12</sup> were filtered from the alignment, which was  
855 then used with the CT18 reference genome (AL513382) to produce a whole genome  
856 pseudoalignment that was subjected to analysis with Gubbins (v2.3.2) <sup>13</sup> to remove any  
857 further recombinant regions. This resulted in a final set of 8,635 SNPs identified from an  
858 alignment of 4,275,037 sites for the 1,266 isolates.

859

860 From the global SNP alignment, maximum likelihood (ML) phylogenetic trees were  
861 inferred using RAxML (v8.2.9) <sup>14</sup>, with a generalized time-reversible model, a Gamma  
862 distribution to model site-specific rate variation (the GTR+  $\Gamma$  substitution model;  
863 GTRGAMMA in RAxML), and 100 bootstrap pseudo-replicates to assess branch  
864 support.

865

866 From the global alignment we extracted a separate SNP alignment for the set of 239  
867 Kenyan *S. Typhi* H58 genomes (n=128 from this study and n=111 from published  
868 studies, see **Table S3** <sup>4,9</sup>, which had length 489 SNPs. The same phylogenetic

869 inference methods were used to generate a ML tree from the SNP alignment of 239  
870 Kenyan isolates for temporal analyses (described below).  
871  
872 Phylogenetic trees were visualized using Microreact (interactive global H58 phylogeny  
873 available at: <https://microreact.org/project/wViqmaRdZuFVEb6yk4i1jU>)<sup>15</sup> and the R  
874 package *ggtree* v1.14.6<sup>16</sup>. For the purpose of plotting the global H58 tree, clusters of *S.*  
875 *Typhi* isolates that were members of the same monophyletic clade and isolated from the  
876 same location in South East Asian countries (i.e. representing local outbreaks) were  
877 reduced to a single representative each using the *drop.tip()* function in the R package  
878 *ape*<sup>17</sup>.

879  
880 Terminal branch lengths were extracted from phylogenies using R package *ggtree*<sup>16</sup>.  
881 Pairwise SNP distances were calculated from alignments using the *dist.dna()* function in  
882 the R package *ape* v5.3<sup>17</sup>. Non-synonymous mutations were detected using SNPPar  
883 (V0.4.2dev)<sup>18</sup> and grouped by function based on the gene in which they were found  
884 according to the *S. Typhi* functional classification scheme developed at the Sanger  
885 Institute ([www.sanger.ac.uk](http://www.sanger.ac.uk)) using the genome annotation of CT18<sup>1,19</sup>.

886

### 887 ***Phylodynamic analysis***

888 To investigate temporal signal and date the introduction of *S. Typhi* H58 into Kenya  
889 based on the 239 available genomes (n=128 from this study, and n=111 from previous  
890 studies<sup>4,9</sup>, we used several methods. First, we used TempEst (v1.5.1)<sup>20</sup> to assess  
891 temporal structure (i.e. clock-like evolution) by conducting a regression analysis of the



892 root-to-tip branch distances of the ML tree as a function of sampling date (expressed as  
893 decimal years at a resolution of days), using the heuristic residual mean squared  
894 method with the best fitting root selected. To estimate divergence dates for the three *S.*  
895 Typhi H58 sublineages we detected in Kenya (EA1-3), we used BEAST (v1.10)<sup>21</sup> to fit a  
896 phylodynamic model to the SNP alignment and isolation dates (as decimal years at a  
897 resolution of days). Note that as EA1-3 almost exclusively comprise Kenyan strains in  
898 the global H58 tree and the parent node for each of EA1-3 is the parent node for all  
899 Kenyan isolates of EA1-3 (see **Fig. 2**), the divergence dates for the EA1-3 parent nodes  
900 in the tree of 239 Kenyan isolates is taken as the divergence date for each of EA1-3  
901 generally, as well as the lower bound for the date of introduction of each of these  
902 sublineages into Kenya.

903

904 We ran separate models using constant-coalescent population size and Bayesian  
905 skyline tree priors, in combination with a strict clock model or a relaxed (uncorrelated  
906 log normal distribution) clock model, to identify the best fitting model for our data. For  
907 BEAST analyses the GTR+ $\Gamma$  substitution model was selected, and sampling times (tip  
908 dates) were used to calibrate the molecular clock (for isolates collected in this study the  
909 precise day of isolation was used; for the previously published genomes, only the  
910 isolation year was known, so tip dates were assigned to the first of July for that year  
911 with an uncertainty of 0.5 years). For all tree prior and model combinations, a chain  
912 length of 100,000,000 steps with sampling every 5,000 steps was used<sup>22</sup>. The relaxed  
913 (uncorrelated lognormal) clock model, that allows for evolutionary rate variations among  
914 branches of the tree and the constant-coalescent model were found to best fit our data.

915 To assess the temporal signal of these Bayesian estimates, we conducted a date-  
916 randomisation test where sampling times were assigned randomly to the sequences,  
917 and the analysis re-run 20 times with the best fitting models (constant-coalescent  
918 demographic and uncorrelated lognormal clock)<sup>22,23</sup>. The date-randomisation test  
919 revealed that these data displayed ‘strong’ temporal structure (meeting the criterion  
920 CR2 of Duchene et al 2016). Our preliminary BEAST runs resulted in implausible tree  
921 topologies and dated the most recent common ancestor (mrca) of H58 *S. Typhi* in  
922 Kenya ~1927 (95% highest posterior density = 1847-1984), conflicting with previously  
923 inferred divergence dates for the emergence of H58 (5,7,26). Fixing the tree topology to  
924 that obtained from ML inference yielded more plausible date estimates (~1968, 95%  
925 HPD = 1957-1977), however, sampling from the prior (without the sequence alignment)  
926 using the same model showed that this estimate was driven entirely by the priors  
927 provided to the model, with no information contributed by the sequence data. Taken  
928 together, these preliminary analyses suggested that while a temporal signal is present  
929 in the alignment, the signal is weak and would benefit from the specification of sensible  
930 priors to calibrate the root height. Previous analyses of the H58 divergence date,  
931 inferred using global data spanning a wider sampling period and with stronger temporal  
932 signal, estimate it emerged circa 1989 (95% HPD, 1981-1995)<sup>7</sup>, and we have  
933 previously reported the presence of H58 lineage 1 in Kenya in the late 1980s<sup>24</sup>. We  
934 therefore specified a log-normally distributed root height prior with mean 1989 and  
935 standard deviation 4 years. Use of this root height prior (without fixing the tree topology)  
936 yielded a plausible tree topology (i.e. consistent with the outgroup-rooted maximum  
937 likelihood tree inferred from the same alignment, with the expected separation of H58

938 sublineages into monophyletic clades), showed evidence of temporal signal (via date  
939 randomisation testing), and was not driven by priors alone; hence this approach was  
940 used for the final analyses presented here.

941  
942 For the final analyses, 2 independent runs each conducted with a chain length of  
943 100,000,000 steps sampling every 5,000 iterations were combined using LogCombiner  
944 (v1.10.0)<sup>21</sup>, after removing the first 10% of steps from each as ‘burn-in’. Maximum-  
945 clade credibility trees (MCC) trees were generated with ‘common ancestor heights’  
946 specified for node heights, using TreeAnnotator (v1.10.0)<sup>21</sup>. The effective sample sizes  
947 (ESS) from the combined runs were >200 for all reported parameters. The resultant  
948 MCC tree was visualized using *ggtree* (v1.14.6)<sup>16</sup> and Microreact<sup>15</sup> (interactive  
949 phylogeny available at: <https://microreact.org/project/l2KUoasUB>).

950

### 951 ***Genomic determinants of antimicrobial resistance***

952 The read mapping-based allele typer SRST2 (v0.2.0)<sup>25</sup> was used to detect the  
953 presence of plasmid replicons (PlasmidFinder database<sup>26</sup>) and antimicrobial resistance  
954 (AMR genes) (ARGannot database<sup>27</sup>) and to identify the precise alleles of AMR genes.  
955 Where AMR genes were observed without evidence of a known AMR plasmid, raw read  
956 data was *de novo* assembled using Unicycler (v0.4.7)<sup>28</sup> and then examined visually  
957 using the Bandage (v0.8.1)<sup>29</sup> assembly graph visualizer, in order to interrogate the  
958 assembly to confirm the chromosomal location and composition of AMR-associated  
959 transposons. ISMapper (v2.0)<sup>30</sup> was used with default parameters to screen all read  
960 sets for insertion sites of transposases of IS1 (accession number J01730) relative to the

961 CT18 reference chromosome sequence, in order to identify the location of any such  
962 insertion sequences in the chromosome of each Kenyan *S. Typhi* genome. Single point  
963 mutations located within the quinolone resistance determining region (QRDR) of genes  
964 *gyrA*, *gyrB*, and *parC* associated with reduced susceptibility to fluoroquinolones<sup>8</sup> were  
965 detected from the whole genome read alignments (BAM files) described above, using  
966 GenoTyphi<sup>4-6</sup>. Where a resistance phenotype was detected in the absence of known  
967 molecular determinants of AMR, DBGWAS (v0.5.4)<sup>31 31</sup> was utilised to carry out a  
968 bacterial genome-wide association study (GWAS) to screen for genetic loci and/or  
969 variants associated with the observed resistance phenotype.

970

### 971 ***Statistical and spatial analysis***

972 All statistical analyses unless otherwise stated were carried out using R (v4.0.2).  
973 Multivariate logistic regression analyses were conducted with the *glm()* function in base  
974 R, and linear regression analyses of were carried out using the *lm()* function in base R.  
975 Shannon diversity was calculated using the *diversity()* function in the R package *vegan*  
976<sup>32</sup>. Base R function *chisq.test()* was used to conduct a Chi-Squared test of age groups  
977 and *S. Typhi* genotypes. Fisher's exact test was carried out using the *fisher.test()*  
978 function in base R to investigate the frequency of non-synonymous mutations among  
979 cases and carriers, as well as associations between binary categories ('high' vs 'low')  
980 for monthly case counts or carrier counts and weather conditions (monthly rainfall,  
981 minimum and maximum temperature) in either the same month, the previous month, or  
982 two months prior. Thresholds for the 'high' categories were: case or carrier counts >2;  
983 rainfall >75 mm; minimum temperature >14°C; maximum temperature >26°C.

984

985 GPS coordinate data were visualized using Microreact<sup>15</sup>.

986

987

988

989 **Supplementary results**

990 ***Precision of AMR phenotypes from genotypes***

991 Observed AMR phenotypes for all high quality WGS data (n=128 H58 and n=8 Non-H58  
992 genome sequences) were largely explained by the presence of known molecular  
993 determinants of AMR (**Table S5**). Sensitivity was generally high for previous first line  
994 drugs for treating typhoid including chloramphenicol, ampicillin, co-trimoxazole, as well  
995 as tetracyclines (>94%), as was specificity (>74%), and low very major errors (VME;  
996 failure to predict a resistance phenotype) were determined for these drugs (<4%). Major  
997 errors (ME; failure to predict a susceptible resistance phenotype) ranged between 5.1-  
998 7.4% for these drugs, and for three sequences, this is potentially explained by the loss  
999 of an IncHI1 plasmid (n=2) or Tn2670-like transposon (n=1) associated with the MDR  
1000 phenotype in culture, as resistance phenotypes were not observed for any of these  
1001 drugs.

1002  
1003 VME for nalidixic acid (32.4%), and ME (23.5%) for ciprofloxacin were both high. The  
1004 sensitivity and specificity for these drugs (**Table S5**) are confounded by the presence of  
1005 the GyrB-S464F mutation (**Table 2**), conserved in all n=73 genome sequences of  
1006 genotype 4.3.1.2.EA2 (H58 lineage 2 sublineage East Africa 2; discussed below in  
1007 detail). The GyrB-S464F mutation has been previously reported to cause Decreased  
1008 Ciprofloxacin Susceptibility (DCS), but not nalidixic acid resistance<sup>33</sup>, however, in our  
1009 data the relationship between GyrB-S464F Quinolone/Fluoroquinolone resistance in this  
1010 strain background remains unclear as 50.7% of EA2 isolates showed reduced  
1011 susceptibility to nalidixic acid and 47.9% ciprofloxacin, with the rest testing sensitive to

1012 these drugs. Neither comparative analysis of resistant and sensitive EA2 sequences,  
1013 nor further bacterial GWAS analysis, revealed any evidence of either causal or  
1014 compensatory mutations, or the acquisition/loss of genetic loci responsible for these  
1015 phenotypes, perhaps due to low power.

1016

1017 Specificity estimates were high (100%), but sensitivity low (0%), for third generation  
1018 cephalosporins including ceftazidime cefotaxime ceftriaxone and cefpodoxime (see  
1019 **Table S5**). This was the result of phenotypic resistance to 3<sup>rd</sup> generation cephalosporins  
1020 detected at low frequency among our high quality sequenced genomes (n=1-4, 0.73-  
1021 2.9%) in the absence of any known molecular determinants for resistance to these  
1022 drugs. A GWAS was again carried out using susceptibility data for these drugs, but no  
1023 candidate molecular mechanisms significantly associated with the observed resistance  
1024 phenotypes were identified, again possibly due to low power.

1025

### 1026 **Local subpopulations of *S. Typhi* H58**

1027 *Salmonella* Typhi H58 (genotype 4.3.1) is subdivided into lineages I (genotype 4.3.1.1)  
1028 and II (genotype 4.3.1.2). Lineage II was more common in this setting than lineage I:  
1029 n=90 (62.1% of H58) vs n=55 (37.9%). Examination of the global phylogeny (**Fig. 2**, and  
1030 online interactive version <https://microreact.org/project/wViqmaRdZuFVEb6yk4i1jU>)  
1031 revealed all H58 lineage I isolates from this study shared a most recent common  
1032 ancestor (mrca) whose descendants form a monophyletic clade that exclusively  
1033 comprised *S. Typhi* from East African countries (see **Fig. 2**). This clade corresponds to  
1034 the previously reported introduction of H58 lineage I from South Asia into Eastern

1035 Africa, which appears to have arrived in Kenya before spreading to Tanzania and on to  
1036 Malawi and South Africa<sup>4,34</sup> (**Fig. 2**). Here, we define this as H58 sublineage EA1 (East  
1037 Africa 1) with genotype designation 4.3.1.1.EA1 (labelled in **Fig. 2**), which can be  
1038 identified by the presence of a synonymous marker SNP STY0750-G1407A (position  
1039 751854 in CT18; this genotype has been added to the GenoTyphi scheme available at  
1040 <http://github.com/katholt/genotyphi>).

1041  
1042 *S. Typhi* H58 lineage II (genotype 4.3.1.2) isolates from our study belonged to two  
1043 distinct clades of the global phylogeny (**Fig. 2**), which were each exclusively populated  
1044 by East African isolates. The largest of these clades (n=80 isolates, of which 81.3%  
1045 derive from the current study) formed a monophyletic group in which isolates from this  
1046 study were intermingled with those obtained from previous studies in Kenya (n=14,  
1047 17.5%), and a single Tanzanian strain isolated in 2012 (see **Fig. 2**), suggestive of a  
1048 single inter-country transmission event from Kenya into Tanzania. This clade is nested  
1049 within a deeper clade of diverse South Asian isolates (see **Fig. 2**), and corresponds to  
1050 the previously reported introduction of H58 lineage II into Kenya from South Asia<sup>7,9</sup>.  
1051 This lineage, here defined as H58 sublineage EA2 (East Africa 2) and designated  
1052 genotype 4.3.1.2.EA2 (labelled in **Fig. 2**), can be identified by the presence of a  
1053 synonymous marker SNP STY4818-C1069T (position 4680610 in CT18). The smaller  
1054 East African H58 lineage II clade (n=43 isolates) comprised two sister clades, separated  
1055 by  $\geq 13$  SNPs, one involving isolates from Kenya (n=13, all from this study) and the other  
1056 isolates from Uganda (n=30, which accounted for 100% of the typhoid burden at the  
1057 Ugandan site in the TSAP study<sup>9</sup>) (see **Fig. 2**). This clade (including both the Ugandan



1058 and Kenyan subgroups) is here defined as H58 sublineage EA3 (East Africa 3) and  
1059 designated genotype 4.3.1.2.EA3 (labelled in **Fig. 2**), identified by synonymous marker  
1060 SNP STY2750-G96A (position 2587488 in CT18). Both EA2 and EA3 genotypes have  
1061 been added to the GenoTyphi scheme.

1062

1063 The three East African H58 subgroups circulating in our setting all had high rates of  
1064 MDR (84%, 74% and 94%, respectively); however in EA2, MDR was exclusively  
1065 associated with the PST6-IncHI1 plasmid, and in EA3 exclusively with the chromosomal  
1066 insertion (see **Table 2** and **Fig. 2**). In EA1, most MDR was associated with the PST6-  
1067 IncHI1 plasmid. However, a subclade of isolates (associated with spread to Tanzania  
1068 and Malawi) carried the chromosomal insertion instead (see **Table 2** and **Fig. 2**).

1069 Chromosomal integration of MDR strains has not previously been reported in *S. Typhi*  
1070 from Kenya, although it has been reported in the Malawi and Tanzanian sublineages of  
1071 EA1<sup>7</sup> which our data suggests transferred to those locations from Kenya. Here, the  
1072 integration of the MDR composite transposon into the chromosome of Kenyan EA1 and  
1073 EA3 isolates was supported by both examination of genome assembly graphs and  
1074 analysis of *IS1* insertion sites (see **Methods**), both of which supported integration near  
1075 gene *cyaA* as has been reported previously<sup>5,7</sup>. Interestingly, MDR in the Ugandan  
1076 subclade of EA3 was associated with the IncHI1-PST6 plasmid, suggesting that  
1077 migration of the transposon from plasmid to chromosome may have occurred *in situ* in  
1078 Kenya after divergence from the Ugandan branch. The three East African lineages also  
1079 differed markedly in their patterns of mutations associated with reduced susceptibility to  
1080 fluoroquinolones: GyrB-S464F was conserved among all EA2, whereas all EA3 isolates

1081 carried the GyrA-S83Y mutation, and three distinct GyrA mutations, and the GyrA-  
1082 S464F mutation were detected at low frequency in EA1 (see **Table 2**).

1083

1084 **Supplementary Table 1 – Sequences used in this study (excel file)**



1086 **Supplementary Table 2 – Outgroup sequences used in this study (excel file)**

|      | <b>Lane_id</b> | <b>Accession_number</b> | <b>Genotype</b> | <b>Year</b> | <b>Country</b>   | <b>Publication</b> |
|------|----------------|-------------------------|-----------------|-------------|------------------|--------------------|
| 1087 |                |                         |                 |             |                  |                    |
| 1088 |                |                         |                 |             |                  |                    |
| 1089 | 10593_2_44     | ERR360657               | 0.0.1           | 1998        | Cameroon         | Wong et al 2015    |
| 1090 | 10562_2_20     | ERR357775               | 0.0.2           | 2011        | Indonesia        | Wong et al 2015    |
| 1091 | 10349_1_89     | ERR343337               | 0.0.3           | 2002        | India            | Wong et al 2015    |
| 1092 | 10592_2_36     | ERR360484               | 0.1.0           | 2009        | Algeria          | Wong et al 2015    |
| 1093 | 10592_2_57     | ERR360505               | 0.1.1           | 2001        | Cameroon         | Wong et al 2015    |
| 1094 | 10593_2_55     | ERR360668               | 0.1.2           | 1999        | Algeria          | Wong et al 2015    |
| 1095 | 10592_2_38     | ERR360486               | 0.1.3           | 1998        | Peru             | Wong et al 2015    |
| 1096 | 10593_2_14     | ERR360627               | 1.1.1           | 2005        | Algeria          | Wong et al 2015    |
| 1097 | 10071_3_32     | ERR338008               | 1.1.2           | 2007        | South Africa     | Wong et al 2015    |
| 1098 | 10592_2_63     | ERR360511               | 1.1.3           | 1976        | DRC              | Wong et al 2015    |
| 1099 | 10493_1_28     | ERR352453               | 1.1.4           | 2011        | Unknown          | Wong et al 2015    |
| 1100 | 10561_2_77     | ERR357652               | 1.2.1           | 1993        | Vietnam          | Wong et al 2015    |
| 1101 | 10592_2_5      | ERR360453               | 2.0.0           | 2003        | Pakistan         | Wong et al 2015    |
| 1102 | 10592_2_2      | ERR360450               | 2.0.1           | 2003        | Pakistan         | Wong et al 2015    |
| 1103 | 10349_1_73     | ERR343321               | 2.0.2           | 2011        | Mexico           | Wong et al 2015    |
| 1104 | 10541_2_8      | ERR357445               | 2.1.0           | 2011        | East Timor       | Wong et al 2015    |
| 1105 | 10060_5_18     | ERR331221               | 2.1.1           | 2006        | Indonesia        | Wong et al 2015    |
| 1106 | 10349_1_3      | ERR343251               | 2.1.2           | 2002        | Western Asia     | Wong et al 2015    |
| 1107 | 10071_3_76     | ERR338052               | 2.1.3           | 2004        | Indonesia        | Wong et al 2015    |
| 1108 | 10349_1_2      | ERR343250               | 2.1.4           | 2002        | Western Asia     | Wong et al 2015    |
| 1109 | 10493_1_42     | ERR352467               | 2.1.5           | 2011        | Indonesia        | Wong et al 2015    |
| 1110 | 10060_5_49     | ERR331252               | 2.1.6           | 2009        | Indonesia        | Wong et al 2015    |
| 1111 | 10562_2_49     | ERR357804               | 2.1.7           | 1993        | Papua New Guinea | Wong et al 2015    |
| 1112 | 9953_5_54      | ERR326650               | 2.1.8           | 2006        | Indonesia        | Wong et al 2015    |
| 1113 | 9953_5_57      | ERR326653               | 2.1.9           | 2007        | Indonesia        | Wong et al 2015    |
| 1114 | 10060_6_73     | ERR331370               | 2.2.0           | 2006        | Tanzania         | Wong et al 2015    |
| 1115 | 10493_1_15     | ERR352440               | 2.2.1           | 2012        | India            | Wong et al 2015    |
| 1116 | 10562_2_12     | ERR357767               | 2.2.2           | 2011        | India            | Wong et al 2015    |
| 1117 | 10209_5_36     | ERR340792               | 2.2.3           | 2002        | Laos             | Wong et al 2015    |
| 1118 | 9475_4_57      | ERR279353               | 2.2.4           | 2004        | India            | Wong et al 2015    |
| 1119 | 10593_2_56     | ERR360669               | 2.3.1           | 2007        | Cameroon         | Wong et al 2015    |
| 1120 | 10592_2_59     | ERR360507               | 2.3.2           | 1999        | Mali             | Wong et al 2015    |
| 1121 | 10593_2_49     | ERR360662               | 2.3.3           | 2000        | Bangladesh       | Wong et al 2015    |
| 1122 | 9953_5_69      | ERR326665               | 2.3.4           | 2010        | Laos             | Wong et al 2015    |
| 1123 | 10493_1_70     | ERR352495               | 2.3.5           | 1983        | Fiji             | Wong et al 2015    |
| 1124 | 10071_3_68     | ERR338044               | 2.4.0           | 2009        | South Africa     | Wong et al 2015    |
| 1125 | 10071_3_40     | ERR338016               | 2.4.1           | 2006        | South Africa     | Wong et al 2015    |
| 1126 | 10349_1_5      | ERR343253               | 2.5.0           | 2002        | India            | Wong et al 2015    |
| 1127 | 10561_2_5      | ERR357580               | 2.5.1           | 2011        | DRC              | Wong et al 2015    |
| 1128 | 10060_5_34     | ERR331237               | 3.0.0           | 2011        | Indonesia        | Wong et al 2015    |
| 1129 | 10593_2_45     | ERR360658               | 3.0.1           | 2000        | Morocco          | Wong et al 2015    |
| 1130 | 10541_2_6      | ERR357443               | 3.0.2           | 2012        | India            | Wong et al 2015    |
| 1131 | 10593_2_18     | ERR360631               | 3.1.0           | 2002        | China            | Wong et al 2015    |
| 1132 | 10593_2_58     | ERR360671               | 3.1.1           | 2004        | Benin            | Wong et al 2015    |
| 1133 | 9953_5_15      | ERR326611               | 3.1.2           | 2010        | Indonesia        | Wong et al 2015    |
| 1134 | 10060_6_66     | ERR331363               | 3.2.1           | 2010        | Laos             | Wong et al 2015    |
| 1135 | 10592_2_25     | ERR360473               | 3.2.2           | 2003        | Pakistan         | Wong et al 2015    |
| 1136 | 10592_2_17     | ERR360465               | 3.3.0           | 2003        | Pakistan         | Wong et al 2015    |
| 1137 | 7468_7_78      | ERR108677               | 3.3.1           | 2009        | Tanzania         | Wong et al 2015    |
| 1138 | 9953_5_93      | ERR326689               | 3.4.0           | 2008        | Laos             | Wong et al 2015    |
| 1139 | 8490_6_44      | ERR213262               | 3.5.0           | 1996        | Fiji             | Wong et al 2015    |
| 1140 | 10493_1_76     | ERR352501               | 3.5.1           | 1985        | Fiji             | Wong et al 2015    |
| 1141 | 10060_6_15     | ERR331312               | 3.5.2           | 2010        | Laos             | Wong et al 2015    |
| 1142 | 10492_1_5      | ERR352258               | 3.5.3           | 2010        | Samoa            | Wong et al 2015    |
| 1143 | 10071_8_55     | ERR338124               | 3.5.4           | 2012        | Samoa            | Wong et al 2015    |
| 1144 | 10071_8_60     | ERR338129               | 4.1.0           | 2012        | Samoa            | Wong et al 2015    |
| 1145 | 9475_6_92      | ERR279189               | 4.1.1           | 2006        | Malawi           | Wong et al 2015    |
| 1146 | 8490_6_49      | ERR213267               | 4.2.0           | 1996        | Fiji             | Wong et al 2015    |
| 1147 | 8447_8_28      | ERR204271               | 4.2.1           | 2008        | Fiji             | Wong et al 2015    |

1148 8490\_5\_25 ERR213243 4.2.2 2011 Fiji Wong et al 2015  
 1149 8490\_6\_61 ERR213279 4.2.3 1994 Fiji Wong et al 2015  
 1150  
 1151  
 1152 **Supplementary Table 3 – Kenyan sequences used in temporal analyses (excel file)**

| <u>Lane.and.tree_ID</u> | <u>Accession_number</u> | <u>Genotype</u> | <u>Year</u> | <u>Date</u> | <u>Country</u> | <u>Publication</u> |
|-------------------------|-------------------------|-----------------|-------------|-------------|----------------|--------------------|
| 16404_4_5               | ERR984707               | 4.3.1.1         | 2012        | 01-07-12    | Kenya          | Park et al. 2018   |
| 16404_4_75              | ERR984776               | 4.3.1.1         | 2012        | 01-07-12    | Kenya          | Park et al. 2018   |
| 16404_5_36              | ERR984827               | 4.3.1.1         | 2012        | 01-07-12    | Kenya          | Park et al. 2018   |
| 16404_5_43              | ERR984834               | 4.3.1.1         | 2012        | 01-07-12    | Kenya          | Park et al. 2018   |
| 16404_5_67              | ERR984858               | 4.3.1.1         | 2012        | 01-07-12    | Kenya          | Park et al. 2018   |
| 16549_7_4               | ERR1010003              | 4.3.1.1         | 2012        | 01-07-12    | Kenya          | Park et al. 2018   |
| 16404_4_46              | ERR984748               | 4.3.1.1         | 2012        | 01-07-12    | Kenya          | Park et al. 2018   |
| 16404_4_59              | ERR984761               | 4.3.1.1         | 2012        | 01-07-12    | Kenya          | Park et al. 2018   |
| 16404_4_65              | ERR984767               | 4.3.1.1         | 2013        | 01-07-13    | Kenya          | Park et al. 2018   |
| 16404_4_66              | ERR984768               | 4.3.1.1         | 2012        | 01-07-12    | Kenya          | Park et al. 2018   |
| 16404_4_73              | ERR984774               | 4.3.1.1         | 2012        | 01-07-12    | Kenya          | Park et al. 2018   |
| 16404_4_80              | ERR984781               | 4.3.1.1         | 2012        | 01-07-12    | Kenya          | Park et al. 2018   |
| 16404_4_87              | ERR984788               | 4.3.1.1         | 2012        | 01-07-12    | Kenya          | Park et al. 2018   |
| 16404_4_89              | ERR984790               | 4.3.1.1         | 2013        | 01-07-13    | Kenya          | Park et al. 2018   |
| 16404_5_35              | ERR984826               | 4.3.1.1         | 2012        | 01-07-12    | Kenya          | Park et al. 2018   |
| 16404_5_37              | ERR984828               | 4.3.1.1         | 2012        | 01-07-12    | Kenya          | Park et al. 2018   |
| 16404_5_44              | ERR984835               | 4.3.1.1         | 2012        | 01-07-12    | Kenya          | Park et al. 2018   |
| 16404_5_45              | ERR984836               | 4.3.1.1         | 2013        | 01-07-13    | Kenya          | Park et al. 2018   |
| 16404_5_51              | ERR984842               | 4.3.1.1         | 2012        | 01-07-12    | Kenya          | Park et al. 2018   |
| 16404_5_52              | ERR984843               | 4.3.1.1         | 2012        | 01-07-12    | Kenya          | Park et al. 2018   |
| 16404_5_53              | ERR984844               | 4.3.1.1         | 2012        | 01-07-12    | Kenya          | Park et al. 2018   |
| 16404_5_60              | ERR984851               | 4.3.1.1         | 2012        | 01-07-12    | Kenya          | Park et al. 2018   |
| 16404_5_68              | ERR984859               | 4.3.1.1         | 2012        | 01-07-12    | Kenya          | Park et al. 2018   |
| 16404_5_76              | ERR984867               | 4.3.1.1         | 2012        | 01-07-12    | Kenya          | Park et al. 2018   |
| 16404_5_77              | ERR984868               | 4.3.1.1         | 2012        | 01-07-12    | Kenya          | Park et al. 2018   |
| 16404_5_84              | ERR984875               | 4.3.1.1         | 2012        | 01-07-12    | Kenya          | Park et al. 2018   |

|            |            |         |      |          |       |                  |
|------------|------------|---------|------|----------|-------|------------------|
| 16404_5_85 | ERR984876  | 4.3.1.1 | 2012 | 01-07-12 | Kenya | Park et al. 2018 |
| 16549_7_18 | ERR1010016 | 4.3.1.1 | 2012 | 01-07-12 | Kenya | Park et al. 2018 |
| 16549_7_20 | ERR1010018 | 4.3.1.1 | 2012 | 01-07-12 | Kenya | Park et al. 2018 |
| 16549_7_23 | ERR1010021 | 4.3.1.1 | 2012 | 01-07-12 | Kenya | Park et al. 2018 |
| 16549_8_1  | ERR1010089 | 4.3.1.1 | 2012 | 01-07-12 | Kenya | Park et al. 2018 |
| 16549_8_10 | ERR1010098 | 4.3.1.1 | 2012 | 01-07-12 | Kenya | Park et al. 2018 |
| 16549_8_16 | ERR1010104 | 4.3.1.1 | 2012 | 01-07-12 | Kenya | Park et al. 2018 |
| 16549_8_17 | ERR1010105 | 4.3.1.1 | 2012 | 01-07-12 | Kenya | Park et al. 2018 |
| 16549_8_18 | ERR1010106 | 4.3.1.1 | 2012 | 01-07-12 | Kenya | Park et al. 2018 |
| 16549_8_2  | ERR1010090 | 4.3.1.1 | 2012 | 01-07-12 | Kenya | Park et al. 2018 |
| 16549_8_31 | ERR1010119 | 4.3.1.1 | 2013 | 01-07-13 | Kenya | Park et al. 2018 |
| 16549_8_33 | ERR1010121 | 4.3.1.1 | 2012 | 01-07-12 | Kenya | Park et al. 2018 |
| 16549_8_47 | ERR1010133 | 4.3.1.1 | 2012 | 01-07-12 | Kenya | Park et al. 2018 |
| 16549_8_48 | ERR1010134 | 4.3.1.1 | 2012 | 01-07-12 | Kenya | Park et al. 2018 |
| 16549_8_54 | ERR1010140 | 4.3.1.1 | 2012 | 01-07-12 | Kenya | Park et al. 2018 |
| 16549_8_63 | ERR1010148 | 4.3.1.1 | 2012 | 01-07-12 | Kenya | Park et al. 2018 |
| 16549_8_8  | ERR1010096 | 4.3.1.1 | 2012 | 01-07-12 | Kenya | Park et al. 2018 |
| 16549_8_9  | ERR1010097 | 4.3.1.1 | 2012 | 01-07-12 | Kenya | Park et al. 2018 |
| 16404_5_75 | ERR984866  | 4.3.1.1 | 2012 | 01-07-12 | Kenya | Park et al. 2018 |
| 16404_4_82 | ERR984783  | 4.3.1.1 | 2012 | 01-07-12 | Kenya | Park et al. 2018 |
| 16404_4_53 | ERR984755  | 4.3.1.1 | 2012 | 01-07-12 | Kenya | Park et al. 2018 |
| 16549_8_26 | ERR1010114 | 4.3.1.1 | 2012 | 01-07-12 | Kenya | Park et al. 2018 |
| 16404_5_59 | ERR984850  | 4.3.1.1 | 2012 | 01-07-12 | Kenya | Park et al. 2018 |
| 16404_5_61 | ERR984852  | 4.3.1.1 | 2012 | 01-07-12 | Kenya | Park et al. 2018 |
| 16404_6_3  | ERR984885  | 4.3.1.1 | 2012 | 01-07-12 | Kenya | Park et al. 2018 |
| 16404_6_35 | ERR984917  | 4.3.1.1 | 2012 | 01-07-12 | Kenya | Park et al. 2018 |
| 16549_8_25 | ERR1010113 | 4.3.1.1 | 2012 | 01-07-12 | Kenya | Park et al. 2018 |
| 16549_8_7  | ERR1010095 | 4.3.1.1 | 2013 | 01-07-13 | Kenya | Park et al. 2018 |
| 16549_8_71 | ERR1010156 | 4.3.1.1 | 2012 | 01-07-12 | Kenya | Park et al. 2018 |
| 10071_8_62 | ERR338131  | 4.3.1.1 | 2007 | 01-07-07 | Kenya | Wong et al. 2016 |

|            |           |         |      |          |       |                  |
|------------|-----------|---------|------|----------|-------|------------------|
| 10071_8_63 | ERR338132 | 4.3.1.1 | 2008 | 01-07-08 | Kenya | Wong et al. 2016 |
| 10071_8_64 | ERR338133 | 4.3.1.1 | 2007 | 01-07-07 | Kenya | Wong et al. 2016 |
| 10071_8_67 | ERR338136 | 4.3.1.1 | 2008 | 01-07-08 | Kenya | Wong et al. 2016 |
| 10071_8_68 | ERR338137 | 4.3.1.1 | 2007 | 01-07-07 | Kenya | Wong et al. 2016 |
| 10071_8_70 | ERR338139 | 4.3.1.1 | 2008 | 01-07-08 | Kenya | Wong et al. 2016 |
| 10071_8_71 | ERR338140 | 4.3.1.1 | 2009 | 01-07-09 | Kenya | Wong et al. 2016 |
| 10071_8_72 | ERR338141 | 4.3.1.1 | 2007 | 01-07-07 | Kenya | Wong et al. 2016 |
| 10071_8_74 | ERR338143 | 4.3.1.1 | 2008 | 01-07-08 | Kenya | Wong et al. 2016 |
| 10071_8_76 | ERR338145 | 4.3.1.1 | 2007 | 01-07-07 | Kenya | Wong et al. 2016 |
| 10071_8_78 | ERR338147 | 4.3.1.1 | 2008 | 01-07-08 | Kenya | Wong et al. 2016 |
| 10071_8_79 | ERR338148 | 4.3.1.1 | 2007 | 01-07-07 | Kenya | Wong et al. 2016 |
| 10071_8_82 | ERR338151 | 4.3.1.1 | 2008 | 01-07-08 | Kenya | Wong et al. 2016 |
| 10071_8_83 | ERR338152 | 4.3.1.1 | 2007 | 01-07-07 | Kenya | Wong et al. 2016 |
| 10071_8_88 | ERR338157 | 4.3.1.1 | 2007 | 01-07-07 | Kenya | Wong et al. 2016 |
| 10071_8_90 | ERR338159 | 4.3.1.1 | 2009 | 01-07-09 | Kenya | Wong et al. 2016 |
| 10071_8_91 | ERR338160 | 4.3.1.1 | 2008 | 01-07-08 | Kenya | Wong et al. 2016 |
| 10071_8_94 | ERR338163 | 4.3.1.1 | 2008 | 01-07-08 | Kenya | Wong et al. 2016 |
| 10071_8_95 | ERR338164 | 4.3.1.1 | 2007 | 01-07-07 | Kenya | Wong et al. 2016 |
| 8525_2_54  | ERR212564 | 4.3.1.1 | 2008 | 01-07-08 | Kenya | Wong et al. 2016 |
| 8525_3_30  | ERR212636 | 4.3.1.1 | 2008 | 01-07-08 | Kenya | Wong et al. 2016 |
| 8525_3_32  | ERR212638 | 4.3.1.1 | 2008 | 01-07-08 | Kenya | Wong et al. 2016 |
| 8525_3_33  | ERR212639 | 4.3.1.1 | 2008 | 01-07-08 | Kenya | Wong et al. 2016 |
| 8525_3_34  | ERR212640 | 4.3.1.1 | 2008 | 01-07-08 | Kenya | Wong et al. 2016 |
| 8525_3_37  | ERR212643 | 4.3.1.1 | 2008 | 01-07-08 | Kenya | Wong et al. 2016 |
| 8525_3_40  | ERR212646 | 4.3.1.1 | 2008 | 01-07-08 | Kenya | Wong et al. 2016 |
| 8525_3_42  | ERR212648 | 4.3.1.1 | 2008 | 01-07-08 | Kenya | Wong et al. 2016 |
| 8525_3_45  | ERR212651 | 4.3.1.1 | 2008 | 01-07-08 | Kenya | Wong et al. 2016 |
| 8525_3_46  | ERR212652 | 4.3.1.1 | 2008 | 01-07-08 | Kenya | Wong et al. 2016 |
| 8525_3_47  | ERR212653 | 4.3.1.1 | 2008 | 01-07-08 | Kenya | Wong et al. 2016 |
| 8525_3_48  | ERR212654 | 4.3.1.1 | 2008 | 01-07-08 | Kenya | Wong et al. 2016 |

|             |            |         |      |          |       |                  |  |
|-------------|------------|---------|------|----------|-------|------------------|--|
| 8525_3_49   | ERR212655  | 4.3.1.1 | 2008 | 01-07-08 | Kenya | Wong et al. 2016 |  |
| 8525_3_51   | ERR212657  | 4.3.1.1 | 2008 | 01-07-08 | Kenya | Wong et al. 2016 |  |
| 8525_3_53   | ERR212659  | 4.3.1.1 | 2008 | 01-07-08 | Kenya | Wong et al. 2016 |  |
| 8525_3_54   | ERR212660  | 4.3.1.1 | 2008 | 01-07-08 | Kenya | Wong et al. 2016 |  |
| 8525_3_55   | ERR212661  | 4.3.1.1 | 2008 | 01-07-08 | Kenya | Wong et al. 2016 |  |
| 8525_3_56   | ERR212662  | 4.3.1.1 | 2008 | 01-07-08 | Kenya | Wong et al. 2016 |  |
| 8525_3_58   | ERR212664  | 4.3.1.1 | 2008 | 01-07-08 | Kenya | Wong et al. 2016 |  |
| 8525_3_59   | ERR212665  | 4.3.1.1 | 2008 | 01-07-08 | Kenya | Wong et al. 2016 |  |
| 8525_3_60   | ERR212666  | 4.3.1.1 | 2008 | 01-07-08 | Kenya | Wong et al. 2016 |  |
| 8525_3_61   | ERR212667  | 4.3.1.1 | 2008 | 01-07-08 | Kenya | Wong et al. 2016 |  |
| 8615_4_29   | ERR217406  | 4.3.1.1 | 2004 | 01-07-04 | Kenya | Wong et al. 2016 |  |
| 16404_4_39  | ERR984741  | 4.3.1.2 | 2013 | 01-07-13 | Kenya | Park et al. 2018 |  |
| 16404_5_69  | ERR984860  | 4.3.1.2 | 2013 | 01-07-13 | Kenya | Park et al. 2018 |  |
| 16549_7_5   | ERR1010004 | 4.3.1.2 | 2013 | 01-07-13 | Kenya | Park et al. 2018 |  |
| 16549_8_34  | ERR1010122 | 4.3.1.2 | 2013 | 01-07-13 | Kenya | Park et al. 2018 |  |
| 10071_8_65  | ERR338134  | 4.3.1.2 | 2007 | 01-07-07 | Kenya | Wong et al. 2016 |  |
| 10071_8_66  | ERR338135  | 4.3.1.2 | 2007 | 01-07-07 | Kenya | Wong et al. 2016 |  |
| 10071_8_69  | ERR338138  | 4.3.1.2 | 2007 | 01-07-07 | Kenya | Wong et al. 2016 |  |
| 10071_8_77  | ERR338146  | 4.3.1.2 | 2007 | 01-07-07 | Kenya | Wong et al. 2016 |  |
| 10071_8_80  | ERR338149  | 4.3.1.2 | 2007 | 01-07-07 | Kenya | Wong et al. 2016 |  |
| 10071_8_81  | ERR338150  | 4.3.1.2 | 2007 | 01-07-07 | Kenya | Wong et al. 2016 |  |
| 10071_8_89  | ERR338158  | 4.3.1.2 | 2007 | 01-07-07 | Kenya | Wong et al. 2016 |  |
| 10071_8_92  | ERR338161  | 4.3.1.2 | 2008 | 01-07-08 | Kenya | Wong et al. 2016 |  |
| 8525_3_31   | ERR212637  | 4.3.1.2 | 2008 | 01-07-08 | Kenya | Wong et al. 2016 |  |
| 8525_3_71   | ERR212677  | 4.3.1.2 | 2001 | 01-07-01 | Kenya | Wong et al. 2016 |  |
| 22204_7_274 | ERR3332596 | 4.3.1.1 | 2014 | 16-01-14 | Kenya | This study       |  |
| 24276_3_143 | ERR3332776 | 4.3.1.2 | 2016 | 18-07-16 | Kenya | This study       |  |
| 22306_3_253 | ERR3332773 | 4.3.1.2 | 2016 | 11-07-16 | Kenya | This study       |  |
| 22306_3_248 | ERR3332770 | 4.3.1.2 | 2014 | 22-09-14 | Kenya | This study       |  |
| 22306_3_247 | ERR3332769 | 4.3.1.1 | 2014 | 15-09-14 | Kenya | This study       |  |



|             |            |         |      |          |       |            |  |
|-------------|------------|---------|------|----------|-------|------------|--|
| 22306_3_244 | ERR3332766 | 4.3.1.2 | 2016 | 13-07-16 | Kenya | This study |  |
| 22306_3_228 | ERR3332758 | 4.3.1.2 | 2014 | 08-09-14 | Kenya | This study |  |
| 22306_3_225 | ERR3332755 | 4.3.1.1 | 2014 | 10-03-14 | Kenya | This study |  |
| 22306_3_218 | ERR3332750 | 4.3.1.1 | 2015 | 12-03-15 | Kenya | This study |  |
| 22306_3_207 | ERR3332746 | 4.3.1.1 | 2014 | 21-07-14 | Kenya | This study |  |
| 22306_3_206 | ERR3332745 | 4.3.1.1 | 2013 | 03-09-13 | Kenya | This study |  |
| 22306_3_205 | ERR3332744 | 4.3.1.1 | 2013 | 23-09-13 | Kenya | This study |  |
| 22306_3_204 | ERR3332743 | 4.3.1.2 | 2014 | 05-03-14 | Kenya | This study |  |
| 22306_3_200 | ERR3332740 | 4.3.1.2 | 2014 | 26-05-14 | Kenya | This study |  |
| 22306_3_197 | ERR3332737 | 4.3.1.1 | 2014 | 01-09-14 | Kenya | This study |  |
| 24276_3_244 | ERR2909580 | 4.3.1.2 | 2014 | 03-03-14 | Kenya | This study |  |
| 22306_3_191 | ERR3332731 | 4.3.1.2 | 2013 | 07-12-13 | Kenya | This study |  |
| 22306_3_188 | ERR3332729 | 4.3.1.2 | 2014 | 03-04-14 | Kenya | This study |  |
| 22306_3_185 | ERR3332727 | 4.3.1.2 | 2014 | 05-03-14 | Kenya | This study |  |
| 22306_3_184 | ERR3332726 | 4.3.1.1 | 2014 | 16-06-14 | Kenya | This study |  |
| 22204_8_178 | ERS3403506 | 4.3.1.1 | 2013 | 04-09-13 | Kenya | This study |  |
| 22306_3_177 | ERR3332719 | 4.3.1.2 | 2013 | 04-09-13 | Kenya | This study |  |
| 24276_3_194 | ERR2909540 | 4.3.1.1 | 2014 | 08-07-14 | Kenya | This study |  |
| 22306_3_85  | ERR3332652 | 4.3.1.2 | 2014 | 06-03-14 | Kenya | This study |  |
| 22306_3_75  | ERR3332648 | 4.3.1.2 | 2013 | 30-09-13 | Kenya | This study |  |
| 22306_3_68  | ERR3332643 | 4.3.1.1 | 2014 | 03-07-14 | Kenya | This study |  |
| 22306_3_67  | ERR3332642 | 4.3.1.2 | 2014 | 09-07-14 | Kenya | This study |  |
| 22306_3_66  | ERR3332641 | 4.3.1.1 | 2014 | 13-02-14 | Kenya | This study |  |
| 22306_3_56  | ERR3332634 | 4.3.1.1 | 2013 | 03-09-13 | Kenya | This study |  |
| 22306_3_55  | ERR3332633 | 4.3.1.1 | 2014 | 11-06-14 | Kenya | This study |  |
| 22306_3_38  | ERR3332623 | 4.3.1.1 | 2013 | 26-09-13 | Kenya | This study |  |
| 24276_3_113 | ERR2909474 | 4.3.1.1 | 2015 | 28-08-15 | Kenya | This study |  |
| 22306_3_27  | ERR3332617 | 4.3.1.2 | 2015 | 11-08-15 | Kenya | This study |  |
| 22306_3_164 | ERR3332709 | 4.3.1.2 | 2015 | 23-07-15 | Kenya | This study |  |
| 24276_3_184 | ERR2909536 | 4.3.1.2 | 2016 | 29-03-16 | Kenya | This study |  |

|             |            |         |      |          |       |            |  |
|-------------|------------|---------|------|----------|-------|------------|--|
| 22306_3_155 | ERR3332701 | 4.3.1.1 | 2015 | 08-07-15 | Kenya | This study |  |
| 22306_3_147 | ERR3332694 | 4.3.1.1 | 2016 | 03-05-16 | Kenya | This study |  |
| 24276_3_168 | ERR2909520 | 4.3.1.2 | 2015 | 02-07-15 | Kenya | This study |  |
| 22306_3_140 | ERR3332691 | 4.3.1.2 | 2015 | 02-07-15 | Kenya | This study |  |
| 22306_3_138 | ERR3332690 | 4.3.1.2 | 2015 | 03-07-15 | Kenya | This study |  |
| 24276_3_116 | ERR2909477 | 4.3.1.1 | 2015 | 28-09-15 | Kenya | This study |  |
| 22306_3_129 | ERR3332685 | 4.3.1.2 | 2016 | 13-06-16 | Kenya | This study |  |
| 22306_3_126 | ERR3332684 | 4.3.1.2 | 2014 | 23-07-14 | Kenya | This study |  |
| 24276_3_185 | ERR2909537 | 4.3.1.2 | 2016 | 06-04-16 | Kenya | This study |  |
| 22306_3_116 | ERR3332677 | 4.3.1.1 | 2016 | 07-06-16 | Kenya | This study |  |
| 22306_3_115 | ERR3332676 | 4.3.1.1 | 2016 | 02-06-16 | Kenya | This study |  |
| 22306_3_108 | ERR3332669 | 4.3.1.2 | 2015 | 08-07-15 | Kenya | This study |  |
| 22306_3_96  | ERR3332662 | 4.3.1.2 | 2014 | 04-02-14 | Kenya | This study |  |
| 22306_3_93  | ERR3332660 | 4.3.1.2 | 2016 | 11-01-16 | Kenya | This study |  |
| 22306_3_92  | ERR3332659 | 4.3.1.2 | 2015 | 02-11-15 | Kenya | This study |  |
| 24276_3_171 | ERR2909523 | 4.3.1.2 | 2015 | 01-10-15 | Kenya | This study |  |
| 24276_3_170 | ERR2909522 | 4.3.1.2 | 2015 | 13-08-15 | Kenya | This study |  |
| 24276_3_214 | ERR2909557 | 4.3.1.1 | 2013 | 12-10-13 | Kenya | This study |  |
| 24276_3_115 | ERR2909476 | 4.3.1.2 | 2015 | 14-09-15 | Kenya | This study |  |
| 24276_3_277 | ERR2909611 | 4.3.1.1 | 2013 | 21-11-13 | Kenya | This study |  |
| 24276_3_249 | ERR2909585 | 4.3.1.2 | 2013 | 23-09-13 | Kenya | This study |  |
| 24276_3_129 | ERR2909490 | 4.3.1.2 | 2016 | 10-02-16 | Kenya | This study |  |
| 24276_3_126 | ERR2909487 | 4.3.1.1 | 2016 | 26-01-16 | Kenya | This study |  |
| 24276_3_180 | ERR2909532 | 4.3.1.1 | 2016 | 08-02-16 | Kenya | This study |  |
| 22204_7_161 | ERR3332562 | 4.3.1.1 | 2013 | 11-11-13 | Kenya | This study |  |
| 24276_3_278 | ERR2909612 | 4.3.1.2 | 2013 | 27-11-13 | Kenya | This study |  |
| 24276_3_248 | ERR2909584 | 4.3.1.2 | 2013 | 23-09-13 | Kenya | This study |  |
| 24276_3_197 | ERR2909543 | 4.3.1.2 | 2013 | 20-08-13 | Kenya | This study |  |
| 24276_3_256 | ERR2909592 | 4.3.1.1 | 2015 | 03-06-15 | Kenya | This study |  |
| 24276_3_177 | ERR2909529 | 4.3.1.2 | 2016 | 28-01-16 | Kenya | This study |  |

|             |            |         |      |          |       |            |  |
|-------------|------------|---------|------|----------|-------|------------|--|
| 24276_3_155 | ERR2909508 | 4.3.1.1 | 2015 | 17-03-15 | Kenya | This study |  |
| 24276_3_247 | ERR2909583 | 4.3.1.2 | 2013 | 23-09-13 | Kenya | This study |  |
| 24276_3_159 | ERR2909511 | 4.3.1.2 | 2015 | 05-05-15 | Kenya | This study |  |
| 24276_3_193 | ERR2909539 | 4.3.1.2 | 2014 | 28-04-14 | Kenya | This study |  |
| 24276_3_164 | ERR2909516 | 4.3.1.2 | 2014 | 16-10-14 | Kenya | This study |  |
| 22204_7_146 | ERR3332556 | 4.3.1.2 | 2013 | 29-08-13 | Kenya | This study |  |
| 22204_7_145 | ERR3332555 | 4.3.1.1 | 2016 | 01-03-16 | Kenya | This study |  |
| 24276_3_122 | ERR2909483 | 4.3.1.1 | 2015 | 17-11-15 | Kenya | This study |  |
| 22204_7_142 | ERR2525481 | 4.3.1.1 | 2015 | 09-11-15 | Kenya | This study |  |
| 24276_3_135 | ERR2909496 | 4.3.1.2 | 2016 | 24-02-16 | Kenya | This study |  |
| 24276_3_226 | ERR2909568 | 4.3.1.1 | 2016 | 08-02-16 | Kenya | This study |  |
| 24276_3_153 | ERR2909506 | 4.3.1.2 | 2015 | 04-03-15 | Kenya | This study |  |
| 24276_3_157 | ERR2909509 | 4.3.1.2 | 2015 | 21-04-15 | Kenya | This study |  |
| 22204_7_130 | ERR3332551 | 4.3.1.1 | 2015 | 24-04-15 | Kenya | This study |  |
| 22204_7_122 | ERR3332548 | 4.3.1.1 | 2015 | 23-06-15 | Kenya | This study |  |
| 22204_7_115 | ERR3332546 | 4.3.1.2 | 2015 | 08-04-15 | Kenya | This study |  |
| 22204_7_111 | ERR3332545 | 4.3.1.2 | 2015 | 11-06-15 | Kenya | This study |  |
| 22204_7_107 | ERR3332543 | 4.3.1.2 | 2015 | 23-11-15 | Kenya | This study |  |
| 22204_7_105 | ERR3332542 | 4.3.1.2 | 2015 | 13-11-15 | Kenya | This study |  |
| 22204_7_104 | ERR3332541 | 4.3.1.2 | 2015 | 11-11-15 | Kenya | This study |  |
| 22204_7_97  | ERR3332539 | 4.3.1.1 | 2016 | 08-02-16 | Kenya | This study |  |
| 24276_3_272 | ERR2909608 | 4.3.1.2 | 2016 | 09-03-16 | Kenya | This study |  |
| 22204_7_95  | ERR2525467 | 4.3.1.1 | 2016 | 09-03-16 | Kenya | This study |  |
| 22204_7_262 | ERR2525516 | 4.3.1.2 | 2015 | 07-05-15 | Kenya | This study |  |
| 22204_7_261 | ERR2525515 | 4.3.1.1 | 2015 | 29-06-15 | Kenya | This study |  |
| 22204_7_258 | ERR3332591 | 4.3.1.2 | 2015 | 17-02-15 | Kenya | This study |  |
| 22204_7_256 | ERR3332589 | 4.3.1.2 | 2015 | 27-04-15 | Kenya | This study |  |
| 22204_7_251 | ERR2525508 | 4.3.1.2 | 2015 | 18-03-15 | Kenya | This study |  |
| 22204_7_243 | ERR3332587 | 4.3.1.2 | 2015 | 26-02-15 | Kenya | This study |  |
| 24276_3_152 | ERR2909505 | 4.3.1.1 | 2015 | 19-02-15 | Kenya | This study |  |

|             |            |         |      |          |       |            |  |
|-------------|------------|---------|------|----------|-------|------------|--|
| 22204_7_239 | ERR3332586 | 4.3.1.2 | 2015 | 03-06-15 | Kenya | This study |  |
| 24276_3_160 | ERR2909512 | 4.3.1.2 | 2015 | 26-05-15 | Kenya | This study |  |
| 24276_3_162 | ERR2909514 | 4.3.1.2 | 2015 | 08-06-15 | Kenya | This study |  |
| 22204_7_237 | ERR3332585 | 4.3.1.2 | 2015 | 12-06-15 | Kenya | This study |  |
| 22204_7_236 | ERR2525501 | 4.3.1.2 | 2015 | 12-06-15 | Kenya | This study |  |
| 24276_3_163 | ERR2909515 | 4.3.1.2 | 2015 | 15-06-15 | Kenya | This study |  |
| 22204_7_232 | ERR3332584 | 4.3.1.2 | 2015 | 21-05-15 | Kenya | This study |  |
| 22204_7_223 | ERR2525493 | 4.3.1.2 | 2015 | 13-04-15 | Kenya | This study |  |
| 22204_7_219 | ERR2525491 | 4.3.1.2 | 2015 | 12-05-15 | Kenya | This study |  |
| 24276_3_142 | ERR2909503 | 4.3.1.1 | 2015 | 15-01-15 | Kenya | This study |  |
| 24276_3_141 | ERR2909502 | 4.3.1.2 | 2015 | 13-01-15 | Kenya | This study |  |
| 22204_7_216 | ERR2525488 | 4.3.1.1 | 2015 | 14-01-15 | Kenya | This study |  |
| 22204_7_215 | ERR2525487 | 4.3.1.1 | 2016 | 25-02-16 | Kenya | This study |  |
| 24276_3_161 | ERR2909513 | 4.3.1.2 | 2015 | 08-06-15 | Kenya | This study |  |
| 22204_7_210 | ERR2525484 | 4.3.1.2 | 2015 | 19-10-15 | Kenya | This study |  |
| 24276_3_167 | ERR2909519 | 4.3.1.2 | 2015 | 04-06-15 | Kenya | This study |  |
| 22204_7_209 | ERR2525483 | 4.3.1.2 | 2015 | 26-10-15 | Kenya | This study |  |
| 24276_3_134 | ERR2909495 | 4.3.1.1 | 2016 | 24-02-16 | Kenya | This study |  |
| 24276_3_182 | ERR2909534 | 4.3.1.2 | 2016 | 22-02-16 | Kenya | This study |  |
| 22204_7_208 | ERR3332581 | 4.3.1.2 | 2016 | 09-11-16 | Kenya | This study |  |
| 22204_7_207 | ERR3332580 | 4.3.1.2 | 2016 | 17-11-16 | Kenya | This study |  |
| 24276_3_146 | ERR3332777 | 4.3.1.1 | 2016 | 03-10-16 | Kenya | This study |  |
| 22204_7_193 | ERR3332578 | 4.3.1.2 | 2016 | 26-09-16 | Kenya | This study |  |
| 22204_7_188 | ERR3332577 | 4.3.1.2 | 2016 | 25-10-16 | Kenya | This study |  |
| 24276_3_149 | ERR3332778 | 4.3.1.1 | 2016 | 26-10-16 | Kenya | This study |  |
| 22204_7_185 | ERR3332576 | 4.3.1.1 | 2016 | 11-10-16 | Kenya | This study |  |
| 22204_7_184 | ERR3332575 | 4.3.1.1 | 2016 | 11-10-16 | Kenya | This study |  |
| 22204_7_181 | ERR3332574 | 4.3.1.2 | 2016 | 24-10-16 | Kenya | This study |  |
| 24276_3_276 | ERR3332782 | 4.3.1.2 | 2016 | 25-10-16 | Kenya | This study |  |
| 24276_3_150 | ERR3332779 | 4.3.1.1 | 2016 | 03-11-16 | Kenya | This study |  |

|             |            |         |      |          |       |            |  |
|-------------|------------|---------|------|----------|-------|------------|--|
| 24276_3_238 | ERR3332780 | 4.3.1.1 | 2016 | 10-10-16 | Kenya | This study |  |
| 22204_7_180 | ERR3332573 | 4.3.1.1 | 2016 | 13-10-16 | Kenya | This study |  |
| 22306_3_57  | ERR3332635 | 4.3.1.2 | 2014 | 10-10-14 | Kenya | This study |  |

1153

1154

1155 **Supplementary Table 4. Culture positive typhoid cases and asymptomatic**

1156 **carriers**

| <b><u>Typhoid Cases</u></b>                                | <b>Total</b> | <b>&lt;=1 year</b> | <b>1-7 years</b> | <b>7-16 years</b> | <b>Linear regression association with age (p-value)</b> |
|------------------------------------------------------------|--------------|--------------------|------------------|-------------------|---------------------------------------------------------|
| Febrile participants subjected to stool and blood culture  | 4,670        | 630                | 3,299            | 741               | -                                                       |
| <i>S. Typhi</i> positive                                   | 148 (3.2%)   | 14 (2.2%)          | 102 (3.1%)       | 32 (4.3%)         | 0.000525*                                               |
| - Female                                                   | 49 (1.0%)    | 6 (0.95%)          | 36 (1.1%)        | 7 (0.94%)         | 0.536                                                   |
| - Male                                                     | 99 (2.1%)    | 8 (1.3%)           | 66 (2.0%)        | 25 (3.4%)         | 0.0000773*                                              |
| WGS confirmed <i>S. Typhi</i> positive                     | 100 (2.1%)   | 7 (1.1%)           | 67 (2.0%)        | 26 (3.5%)         | 0.0001*                                                 |
| - Female                                                   | 36 (0.77%)   | 4 (0.63%)          | 25 (0.76%)       | 7 (0.94%)         | 0.508                                                   |
| - Male                                                     | 64 (1.4%)    | 3 (0.48%)          | 42 (1.27%)       | 19 (2.6%)         | 0.000009*                                               |
| <b><u>Asymptomatic Carriers</u></b>                        | <b>8,549</b> | <b>641</b>         | <b>5,495</b>     | <b>2,413</b>      | <b>-</b>                                                |
| Total stool cultures from non-febrile age-matched controls | 8,530        | 641                | 5,480            | 2,409             | -                                                       |
| <i>S. Typhi</i> positive                                   | 95 (1.1%)    | 4 (0.62%)          | 62 (1.1%)        | 29 (1.2%)         | 0.402                                                   |
| - Female                                                   | 46 (0.54%)   | 3 (0.47%)          | 31 (0.57%)       | 12 (0.50%)        | 0.585                                                   |
| - Male                                                     | 49 (0.57%)   | 1 (0.16%)          | 31 (0.57%)       | 17 (0.71%)        | 0.081                                                   |
| WGS confirmed <i>S. Typhi</i> positive                     | 55 (0.64%)   | 4 (0.62%)          | 31 (0.57%)       | 20 (0.83%)        | 0.256                                                   |
| - Female                                                   | 29 (0.34%)   | 3 (0.47%)          | 16 (0.29%)       | 10 (0.42%)        | 0.909                                                   |
| - Male                                                     | 26 (0.30%)   | 1 (0.16%)          | 15 (0.27%)       | 10 (0.42%)        | 0.127                                                   |

1157

1158

1159

1160

1161

1162

1163

1164

1165

1166

1167

1168

1169  
1170  
1171  
1172  
1173  
1174  
1175  
1176

1177

1178 **Supplementary Table 5 – Comparison of phenotypic and genotypic AMR profiles**  
1179 **of 136 (n=128 H58, n=8 Non-H58) high quality S. Typhi genome sequences**

| <u>Drug class</u>                      | <u>Resistant phenotype*</u> | <u>Resistant genotype</u> | <u>Very major error</u> | <u>Susceptible phenotype</u> | <u>Susceptible genotype</u> | <u>Major error</u> | <u>Sensitivity</u> | <u>Specificity</u> | <u>PPV</u> |
|----------------------------------------|-----------------------------|---------------------------|-------------------------|------------------------------|-----------------------------|--------------------|--------------------|--------------------|------------|
| <b>Beta-lactamases</b>                 |                             |                           |                         |                              |                             |                    |                    |                    |            |
| Ampicillin                             | 100                         | 95                        | 5 (3.7%)                | 36                           | 28                          | 8 (5.9%)           | 95%                | 77.8 %             | 92.2%      |
| Ceftazidime                            | 1                           | 0                         | 1 (0.74%)               | 135                          | 135                         | 0                  | 0%                 | 100%               | 0%         |
| Cefotaxime                             | 4                           | 0                         | 4 (2.9%)                | 132                          | 132                         | 0                  | 0%                 | 100%               | 0%         |
| Ceftriaxone                            | 1                           | 0                         | 1 (0.74%)               | 135                          | 135                         | 0                  | 0%                 | 100%               | 0%         |
| Cefpodoxime                            | 4                           | 0                         | 4 (2.9%)                | 132                          | 132                         | 0                  | 0%                 | 100%               | 0%         |
| <b>Chloramphenicol</b>                 |                             |                           |                         |                              |                             |                    |                    |                    |            |
| Chloramphenicol                        | 93                          | 92                        | 1 (0.74%)               | 43                           | 32                          | 10 (7.4%)          | 98.9%              | 74.4%              | 89.3%      |
| <b>Tetracyclines</b>                   |                             |                           |                         |                              |                             |                    |                    |                    |            |
| Tetracycline                           | 69                          | 65                        | 4 (2.9%)                | 67                           | 59                          | 8 (5.9%)           | 94.2%              | 88.1%              | 89.0%      |
| <b>Folate pathway inhibitors</b>       |                             |                           |                         |                              |                             |                    |                    |                    |            |
| Co-trimoxazole                         | 98                          | 96                        | 2 (1.5%)                | 38                           | 31                          | 7 (5.1%)           | 98.0%              | 81.6%              | 93.2%      |
| <b>Quinolones and Fluoroquinolones</b> |                             |                           |                         |                              |                             |                    |                    |                    |            |
| Ciprofloxacin                          | 63                          | 55                        | 8 (5.9%)                | 73                           | 41                          | 32 (23.5%)         | 87.3%              | 56.2%              | 63.2%      |
| Nalidixic acid                         | 65                          | 21                        | 44 (32.4%)              | 71                           | 71                          | 0                  | 32.3%              | 100%               | 100%       |

1180 \*indicates where resistant and intermediate phenotypes have been combined as resistant

1181  
1182  
1183  
1184  
1185  
1186

**Supplementary Table 6 – Distribution of n=153 S. Typhi genotypes among each sex for cases and controls**

|  | <u>Female</u> | <u>Male</u> |
|--|---------------|-------------|
|  |               |             |

|                               |            |            |
|-------------------------------|------------|------------|
| <b>WGS-confirmed cases</b>    | <b>35</b>  | <b>64</b>  |
| EA1                           | 12 (34.3%) | 23 (35.9%) |
| EA2                           | 16 (45.7%) | 30 (46.9%) |
| EA3                           | 4 (11.4%)  | 11 (17.9%) |
| non-H58                       | 3 (8.57%)  | 0          |
| <b>WGS-confirmed carriers</b> | <b>28</b>  | <b>26</b>  |
| EA1                           | 10 (35.7%) | 10 (38.5%) |
| EA2                           | 18 (64.3%) | 9 (34.6%)  |
| EA3                           | 0          | 2 (7.69%)  |
| non-H58                       | 0          | 5 (19.2%)  |

1187 **Supplementary table 7 - Climatic predictors of elevated case and carrier counts**  
 1188 **for all samples**

| <b>Typhoid Cases</b>             |                   |         |                  |         |                 |         |
|----------------------------------|-------------------|---------|------------------|---------|-----------------|---------|
| Month                            | Same month        |         | Previous month   |         | 2 months prior  |         |
|                                  | OR (95% CI)       | p-value | OR (95% CI)      | p-value | OR (95% CI)     | p-value |
| Rainfall (precipitation) > 75 mm | 0.65 (0.13-3.2)   | 0.72    | 0.85 (0.17-4.4)  | 1       | 2.4 (0.46-17.1) | 0.29    |
| Minimum temperature >14°C        | 0.17 (0.025-0.86) | 0.022*  | 0.39 (0.080-1.7) | 0.20    | 0.60 (0.13-2.6) | 0.53    |
| Maximum temperature >26°C        | 0.43 (0.094-1.8)  | 0.22    | 0.43 (0.094-1.8) | 0.22    | 0.55 (0.12-2.3) | 0.52    |
| <b>Asymptomatic Carriers</b>     |                   |         |                  |         |                 |         |
| Month                            | Same month        |         | Previous month   |         | 2 months prior  |         |
|                                  | OR (95% CI)       | p-value | OR (95% CI)      | p-value | OR (95% CI)     | p-value |
| Rainfall (precipitation) > 75 mm | 0.95 (0.19-4.5)   | 1       | 1.18 (0.23-5.9)  | 1       | 1.18 (0.23-5.9) | 1       |
| Minimum temperature >14°C        | 0.16 (0.029-0.74) | 0.0095* | 0.72 (0.17-3.1)  | 0.75    | 1.1 (0.26-4.7)  | 1       |
| Maximum temperature >26°C        | 0.19 (0.037-0.86) | 0.024*  | 0.30 (0.063-1.3) | 0.11    | 0.82 (0.19-3.4) | 1       |

1189 Values in cells are odds ratios and p-values for Fisher's exact test between high case/control  
 1190 count and high rainfall/temperature. \* highlights p-value <0.05.

1191  
 1192  
 1193

1194 **Supplementary Table 8: nonsynonymous (NS) Mutations among S. Typhi isolates**

| Lane and tree ID | Accession number | Status  | Study area | Position in | Ancestor | All Derived Alle | CT18 Gene           | Classifier | Gene_produ           | Functional_c   | Codon | Ancestor Co | Derived Cod | Ancestor An | Derived Am | Mutation      |
|------------------|------------------|---------|------------|-------------|----------|------------------|---------------------|------------|----------------------|----------------|-------|-------------|-------------|-------------|------------|---------------|
| 22204_8_178      | ERS3403506       | Control | Yes        | 4626124     | C        | A                | ytfM/STY4764.1.0    |            | Putative expi        | Periplasmic/i  |       | 322 AAC     | AAA         | N           | K          | ytfM-N322K    |
| 24276_3_116      | ERS1909313       | Case    | No         | 4021517     | G        | A                | yjhW/STY4164.1.1    |            | putative mer         | Inner membi    |       | 168 GGC     | AGC         | G           | S          | yjhW-G168S    |
| 24276_3_116      | ERS1909313       | Case    | No         | 3385249     | C        | T                | yhcP/STY3544.1.1    |            | Putative mer         | Inner membi    |       | 106 TGT     | TAT         | C           | Y          | yhcP-C106Y    |
| 22204_7_236      | ERS1573056       | Control | Yes        | 2171000     | G        | A                | yegD/STY2330.0.2    |            | conserved hy         | Unknown fur    |       | 183 GCC     | ACC         | A           | T          | yegD-A183T    |
| 22306_3_66       | ERS3403489       | Case    | No         | 962807      | T        | C                | ycam/STY0915.0.0    |            | Probable tra         | Transport/bi   |       | 440 TTC     | CTC         | F           | L          | ycam-F440L    |
| 22204_7_145      | ERS3403339       | Case    | Yes        | 868216      | T        | G                | ybir/STY0877.4.1.1  |            | Putative mer         | Inner membi    |       | 322 TTT     | GTT         | F           | V          | ybir-F322V    |
| 24276_3_146      | ERS3403282       | Case    | No         | 662248      | A        | G                | ybdQ/STY0600.0.2    |            | Conserved hy         | Unknown fur    |       | 128 TCA     | CCA         | S           | P          | ybdQ-S128P    |
| 22204_7_236      | ERS1573056       | Control | Yes        | 2143349     | T        | G                | wzc/STY2314.1.4     |            | putative tran        | Surface poly   |       | 26 TTA      | TTC         | L           | F          | wzc-L26F      |
| 22204_7_130      | ERS3403329       | Control | Yes        | 2160205     | A        | C                | wza/STY2314.1.4     |            | Putative poly        | Surface poly   |       | 137 CTG     | GGC         | V           | G          | wza-V137G     |
| 24276_3_129      | ERS1909314       | Case    | No         | 4725276     | A        | T                | uxuR/STY4866.1.1    |            | uxu operon t         | Global regul   |       | 71 ATC      | TTC         | I           | F          | uxuR-I71F     |
| 24276_3_159      | ERS1909348       | Control | No         | 4517487     | G        | A                | twiE/STY4656.5.1.5  |            | Vi polysacchi        | Surface poly   |       | 263 CCG     | TGC         | P           | S          | twiE-P263S    |
| 24276_3_194      | ERS1909377       | Control | Yes        | 4521071     | G        | A                | twiD/STY4656.5.1.5  |            | Vi polysacchi        | Surface poly   |       | 159 CGT     | TGT         | R           | C          | twiD-R159C    |
| 24276_3_135      | ERS1909320       | Case    | No         | 4523895     | C        | T                | twiB/STY4656.5.1.5  |            | Vi polysacchi        | Surface poly   |       | 1 GTG       | ATG         | V           | M          | twiB-V1M      |
| 24276_3_149      | ERS3403283       | Case    | No         | 1282526     | G        | A                | trpB/STY1323.1.19   |            | tryptophan s         | Amino acid b   |       | 35 GCG      | GTG         | A           | V          | trpB-A35V     |
| 24276_3_161      | ERS1909350       | Case    | No         | 4653330     | G        | A                | trpB/STY4791.5.37   |            | PTS system, t        | Transport/bi   |       | 323 ACC     | ATC         | T           | I          | trpB-T323I    |
| 22204_7_111      | ERS3403322       | Control | Yes        | 4318042     | C        | T                | STY4449             | 4.1.0      | putative lipoj       | Periplasmic/i  |       | 55 TGG      | TAG         | W           | *          | STY4449-W55*  |
| 24276_3_150      | ERS3403284       | Control | No         | 4104133     | C        | T                | STY4236             | 4.1.1      | putative mer         | Inner membi    |       | 43 TGG      | TAG         | W           | *          | STY4236-W43*  |
| 24276_3_194      | ERS1909377       | Control | Yes        | 4102295     | C        | T                | STY4235             | 1.5.30     | heavy metal-         | Transport/bi   |       | 420 GGC     | GAC         | G           | D          | STY4235-G420D |
| 24276_3_194      | ERS1909377       | Control | Yes        | 3788415     | G        | T                | STY3925             | 1.5.37     | probable PTS         | Transport/bi   |       | 38 GTT      | TTT         | V           | F          | STY3925-V38F  |
| 24276_3_146      | ERS3403282       | Case    | No         | 3695295     | G        | A                | STY3837             | 4.1.0      | putative lipoj       | Periplasmic/i  |       | 36 GCG      | ACG         | A           | T          | STY3837-A36T  |
| 22204_7_216      | ERS1573035       | Case    | Yes        | 3628992     | G        | A                | STY3765             | 0.0.0      | hypothetical         | Unknown fur    |       | 377 CCG     | TGC         | P           | S          | STY3765-P377S |
| 22306_3_185      | ERS3403513       | Control | Yes        | 3471310     | A        | C                | STY3618             | 4.1.1      | Putative mer         | Inner membi    |       | 35 TTA      | GTA         | L           | V          | STY3618-L35V  |
| 24276_3_193      | ERS1909376       | Case    | Yes        | 3471046     | T        | C                | STY3618             | 4.1.1      | Putative mer         | Inner membi    |       | 123 ATT     | GTT         | I           | V          | STY3618-I123V |
| 24276_3_116      | ERS1909313       | Case    | No         | 3170381     | G        | A                | STY3325             | 1.1.1      | methyl-acce          | Chemotaxis     |       | 493 GCG     | GAG         | A           | E          | STY3325-A493E |
| 24276_3_182      | ERS1909371       | Case    | Yes        | 3119041     | G        | A                | STY3257             | 3.2.06     | probable oxyl        | Biosynthesis   |       | 82 GAC      | AAC         | D           | N          | STY3257-D82N  |
| 24276_3_194      | ERS1909377       | Control | Yes        | 2501788     | C        | T                | STY2664             | 1.7.1      | cell division        | Cell division  |       | 299 GTC     | ATC         | V           | I          | STY2664-V299I |
| 22204_7_130      | ERS3403329       | Control | Yes        | 2480004     | G        | C                | STY2645             | 4.1.1      | Putative mer         | Inner membi    |       | 88 GAA      | CAA         | E           | Q          | STY2645-E88Q  |
| 22204_7_274      | ERS3403567       | Case    | Yes        | 2399174     | G        | C                | STY2563             | 7.0.0      | putative sodi        | Unclassified/  |       | 557 TCC     | TAC         | S           | Y          | STY2563-S557Y |
| 22204_7_216      | ERS1573035       | Case    | Yes        | 233750      | T        | C                | STY2499             | 2.2.03     | DNA gyrase           | εDNA - replica |       | 87 GAC      | GGC         | D           | G          | gyrA-D87G     |
| 22306_3_207      | ERS3403522       | Case    | Yes        | 233750      | T        | C                | STY2499             | 2.2.03     | DNA gyrase           | εDNA - replica |       | 87 GAC      | GGC         | D           | G          | gyrA-D87G     |
| 22204_7_232      | ERS3403299       | Control | Yes        | 2194420     | G        | A                | STY2361             | 4.1.0      | putative oxyl        | Periplasmic/i  |       | 100 CCA     | CTA         | P           | L          | STY2361-P100L |
| 22204_7_207      | ERS3403295       | Case    | Yes        | 2051377     | G        | A                | STY2216             | 4.1.1      | putative inne        | Inner membi    |       | 397 GCC     | GTG         | A           | V          | STY2216-A397V |
| 22306_3_66       | ERS3403489       | Case    | No         | 1749811     | G        | T                | STY1831             | 0.0.2      | Conserved hy         | Unknown fur    |       | 110 GGA     | TGA         | G           | *          | STY1831-G110* |
| 22204_7_274      | ERS3403567       | Case    | Yes        | 1670239     | G        | A                | STY1750             | 3.3.15     | putative ami         | Central interi |       | 7 CGG       | TGG         | R           | W          | STY1750-R7W   |
| 22306_3_66       | ERS3403489       | Case    | No         | 1533338     | T        | C                | STY1587             | 4.1.1      | putative mer         | Inner membi    |       | 77 GTA      | GCA         | V           | A          | STY1587-V77A  |
| 22204_7_105      | ERS3403315       | Case    | No         | 1491453     | A        | G                | STY1537             | 6.1.1      | putative reg         | Global regul   |       | 42 GAC      | GGC         | D           | G          | STY1537-D42G  |
| 22204_7_208      | ERS3403296       | Case    | No         | 1456243     | G        | A                | STY1499             | 0.0.0      | hypothetical         | Unknown fur    |       | 187 CAA     | TAA         | Q           | *          | STY1499-Q187* |
| 22306_3_66       | ERS3403489       | Case    | No         | 1410841     | T        | C                | STY1460             | 2.1.4      | putative pep         | Degradation    |       | 250 TAT     | CAT         | Y           | H          | STY1460-Y250H |
| 22204_7_237      | ERS3403300       | Case    | Yes        | 1396606     | C        | T                | STY1443             | 4.1.0      | putative expi        | Periplasmic/i  |       | 185 CAG     | TAG         | Q           | *          | STY1443-Q185* |
| 22306_3_66       | ERS3403489       | Case    | No         | 1385997     | T        | C                | STY1434             | 4.1.1      | putative mer         | Inner membi    |       | 274 AAC     | AGC         | N           | S          | STY1434-N274S |
| 24276_3_116      | ERS1909313       | Case    | No         | 1369705     | C        | T                | STY1419             | 7.0.0      | probable pyr         | Unclassified/  |       | 613 GCG     | ACG         | A           | T          | STY1419-A613T |
| 22204_7_216      | ERS1573035       | Case    | Yes        | 1239385     | T        | C                | STY1284             | 5.1.5      | putative oxyl        | Pathogenicity  |       | 466 TGG     | CGG         | W           | R          | STY1284-W466R |
| 24276_3_135      | ERS1909320       | Case    | No         | 1061235     | A        | G                | STY1083             | 1.5.01     | ABC transpo          | Transport/bi   |       | 64 CAG      | CGG         | Q           | R          | STY1083-Q64R  |
| 22204_7_130      | ERS3403329       | Control | Yes        | 339327      | G        | A                | STY0326             | 5.1.5      | conserved hy         | Pathogenicity  |       | 84 TGG      | TGA         | W           | *          | STY0326-W84*  |
| 24276_3_150      | ERS3403284       | Control | No         | 337744      | C        | T                | STY0324             | 5.1.5      | Rhs-family           | Pathogenicity  |       | 427 CAG     | TAG         | Q           | *          | STY0324-Q427* |
| 22204_7_216      | ERS1573035       | Case    | Yes        | 319124      | C        | T                | STY0306             | 5.1.5      | putative mer         | Pathogenicity  |       | 36 CGT      | TGT         | R           | C          | STY0306-R36C  |
| 22204_7_216      | ERS1573035       | Case    | Yes        | 306487      | C        | T                | STY0290             | 5.1.5      | conserved hy         | Pathogenicity  |       | 151 CGC     | CAC         | R           | H          | STY0290-H151H |
| 22204_7_130      | ERS3403329       | Control | Yes        | 306208      | C        | T                | STY0289             | 5.1.5      | hypothetical         | Pathogenicity  |       | 74 CCG      | CAG         | R           | Q          | STY0289-R74Q  |
| 22204_7_216      | ERS1573035       | Case    | Yes        | 1641786     | G        | A                | ssca/STY172.5.1.5   |            | putative Typi        | Pathogenicity  |       | 142 CTC     | TTT         | L           | F          | ssca-L142F    |
| 24276_3_194      | ERS1909377       | Control | Yes        | 1874307     | G        | A                | sopE2/STY195.1.5    |            | putative inVa        | Pathogenicity  |       | 9 CAG       | TAG         | Q           | *          | sopE2-Q9*     |
| 22204_7_232      | ERS3403299       | Control | Yes        | 4603536     | C        | T                | sgaH/STY4743.3.15   |            | putative hexi        | Central interi |       | 186 CAT     | TAT         | H           | Y          | sgaH-H186Y    |
| 24276_3_168      | ERS1909357       | Case    | Yes        | 4277390     | G        | A                | rpsG/STY435.4.2.2   |            | 30S ribosomi         | Ribosome co    |       | 43 GTA      | ATA         | V           | I          | rpsG-V43I     |
| 22204_7_274      | ERS3403567       | Case    | Yes        | 4606083     | G        | A                | rpsF/STY474.4.2.2   |            | 30S ribosomi         | Ribosome co    |       | 9 ATG       | ATA         | M           | I          | rpsF-M9I      |
| 24276_3_194      | ERS1909377       | Control | Yes        | 4794595     | C        | T                | rob/STY4933.1.2.1   |            | right origin-b       | Chromosome     |       | 185 CGC     | CAC         | R           | H          | STY4933-R185H |
| 22204_7_274      | ERS3403567       | Case    | Yes        | 219180      | C        | T                | pcnB/STY0202.2.11   |            | poly(A) poly         | RNA synthesis  |       | 174 AGC     | AAC         | S           | N          | pcnB-S174N    |
| 22204_7_130      | ERS3403329       | Control | Yes        | 4080652     | C        | T                | pitA/STY4214.1.5.23 |            | putative low         | Transport/bi   |       | 340 CGT     | CAT         | R           | H          | STY4214-R340H |
| 22306_3_68       | ERS3403491       | Control | Yes        | 687449      | C        | T                | pbpA/STY0654.1.2    |            | penicillin-bin       | Murein sacc    |       | 409 GGT     | AGT         | G           | S          | mrda-G409S    |
| 24276_3_150      | ERS3403284       | Control | No         | 3892927     | G        | T                | msiL/STY403.5.1.5   |            | putative viral       | Pathogenicity  |       | 402 CGC     | AGC         | R           | S          | msiL-R402S    |
| 22204_7_274      | ERS3403567       | Case    | Yes        | 2216980     | G        | A                | metG/STY232.21.03   |            | methyl- $\alpha$ -tr | Amino acyl t   |       | 554 GCA     | ACA         | A           | T          | metG-A554T    |
| 24276_3_168      | ERS1909357       | Case    | Yes        | 4294622     | T        | G                | maleE/STY442.15.03  |            | periplasmic          | Transport/bi   |       | 340 GAC     | GCC         | D           | A          | maleE-D340A   |
| 22306_3_66       | ERS3403489       | Case    | No         | 742865      | T        | C                | kdpe/STY0746.1.1    |            | KDP operon t         | Global regul   |       | 3 AAC       | AGC         | N           | S          | ldpe-N3S      |
| 22204_7_232      | ERS3403299       | Control | Yes        | 2841954     | G        | A                | hypf/STY296.3.5.2   |            | hydrogenase          | Anaerobic re   |       | 305 CCA     | CTA         | P           | L          | hypA-P305L    |
| 24276_3_150      | ERS3403284       | Control | No         | 1103229     | C        | A                | hpcG/STY1133.4.3    |            | 2-oxo-hepta          | -Degradation   |       | 261 GCG     | GAG         | A           | E          | hpcG-A261E    |
| 22204_7_236      | ERS1573056       | Control | Yes        | 2420019     | G        | A                | hisI/STY2584.15.03  |            | histidine-bin        | Transport/bi   |       | 92 TCG      | TTG         | S           | L          | hisI-S92L     |
| 22204_7_130      | ERS3403329       | Control | Yes        | 3810322     | C        | T                | gyrB/STY394.2.2.03  |            | DNA gyrase           | εDNA - replica |       | 464 TCC     | TTT         | S           | F          | gyrB-F464F    |
| 24276_3_135      | ERS1909320       | Case    | No         | 4142147     | G        | A                | glcC/STY427.2.2.08  |            | glucose-1-ph         | Polysacchari   |       | 110 GGC     | AGC         | G           | S          | glcC-G110G    |
| 22306_3_66       | ERS3403489       | Case    | No         | 2984469     | T        | C                | fucI/STY31163.4.3   |            | L-fucose is          | Degradation    |       | 238 TTC     | CTC         | F           | L          | fucI-F238L    |
| 24276_3_146      | ERS3403282       | Case    | No         | 231921      | G        | A                | fhuD/STY022.15.23   |            | ferrichrome-t        | Transport/bi   |       | 246 ATG     | ATA         | M           | I          | fhuD-M246I    |
| 24276_3_135      | ERS1909320       | Case    | No         | 628273      | G        | A                | fes/STY0629.15.23   |            | enterochelin         | Transport/bi   |       | 51 TGG      | TGA         | W           | *          | fes-W51*      |
| 22204_7_236      | ERS1573056       | Control | Yes        | 3176266     | G        | A                | exbB/STY333.15.23   |            | biopolymer t         | Transport/bi   |       | 54 GCG      | TGC         | R           | C          | exbB-R54C     |
| 24276_3_150      | ERS3403284       | Control | No         | 2038114     | C        | T                | dcm/STY2202.2.03    |            | DNA-cytosini         | DNA - replica  |       | 419 GCG     | ACG         | A           | T          | dcm-A419T     |
| 22204_8_178      | ERS3403506       | Control | Yes        | 1692237     | C        | A                | btuc/STY177.15.02   |            | vitamin B12 t        | Transport/bi   |       | 294 GCC     | TCC         | A           | S          | btuc-A294S    |
| 24276_3_135      | ERS1909320       | Case    | No         | 4018331     | C        | A                | bisC/STY415f7.0.0   |            | biotin sulfoxi       | Unclassified/  |       | 570 CGC     | CAG         | P           | Q          | bisC-P570Q    |
| 24276_3_146      | ERS3403282       | Case    | No         | 3346023     | G        | A                | arcB/STY350.6.1.1   |            | aerobic respi        | Global regul   |       | 443 CCG     | CTG         | P           | L          | arcB-P443L    |
| 24276_3_135      | ERS1909320       | Case    | No         | 2169799     | C        | T                | alkA/STY233.2.2.03  |            | DNA-3-methi          | DNA - replica  |       | 174 ATG     | ATA         | M           | I          | alkA-M174I    |
| 22204_7_274      | ERS3403567       | Case    | Yes        | 2551336     | C        | T                | aegA/STY2717.0.0    |            | putative oxid        | Unclassified/  |       | 116 GCC     | ACC         | A           | T          | aegA-A116T    |
| 24276_3_197      | ERS1909380       | Control | Yes        | 2551116     | G        | T                | aegA/STY2717.0.0    |            | putative oxid        | Unclassified/  |       | 189 GCG     | GAG         | A           | E          | aegA-A189E    |

1195  
1196  
1197  
1198  
1199

Supplementary Figure 1



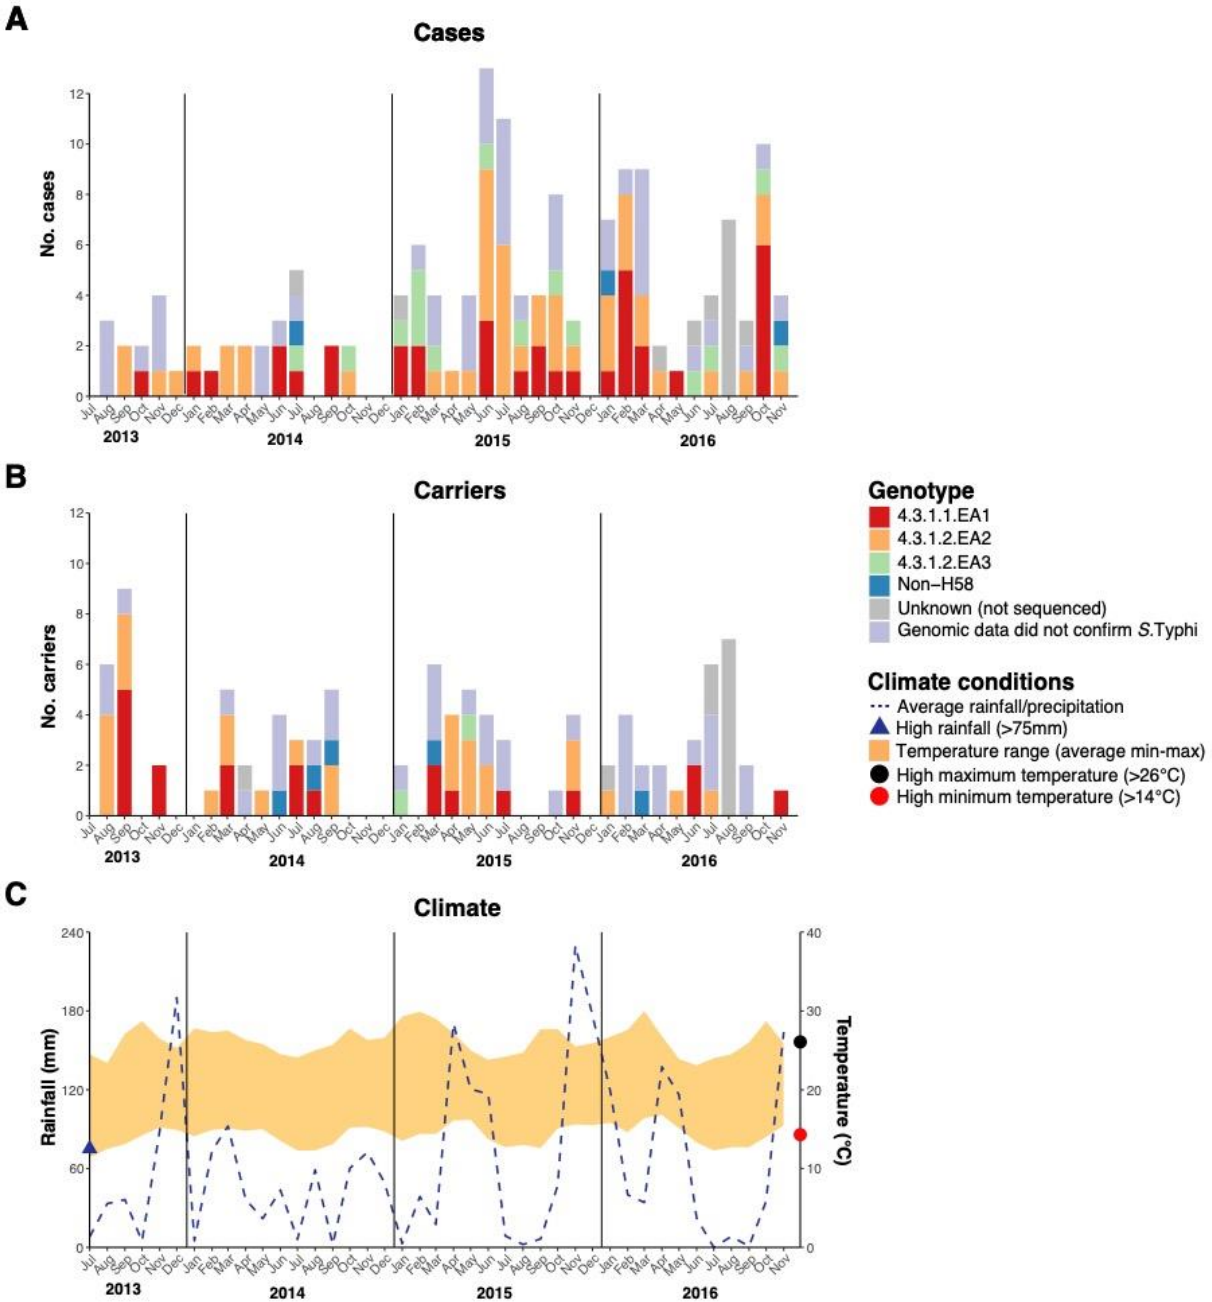

1200

1201

1202

1203

1204

1205

1206 **Supplementary Figure 2**

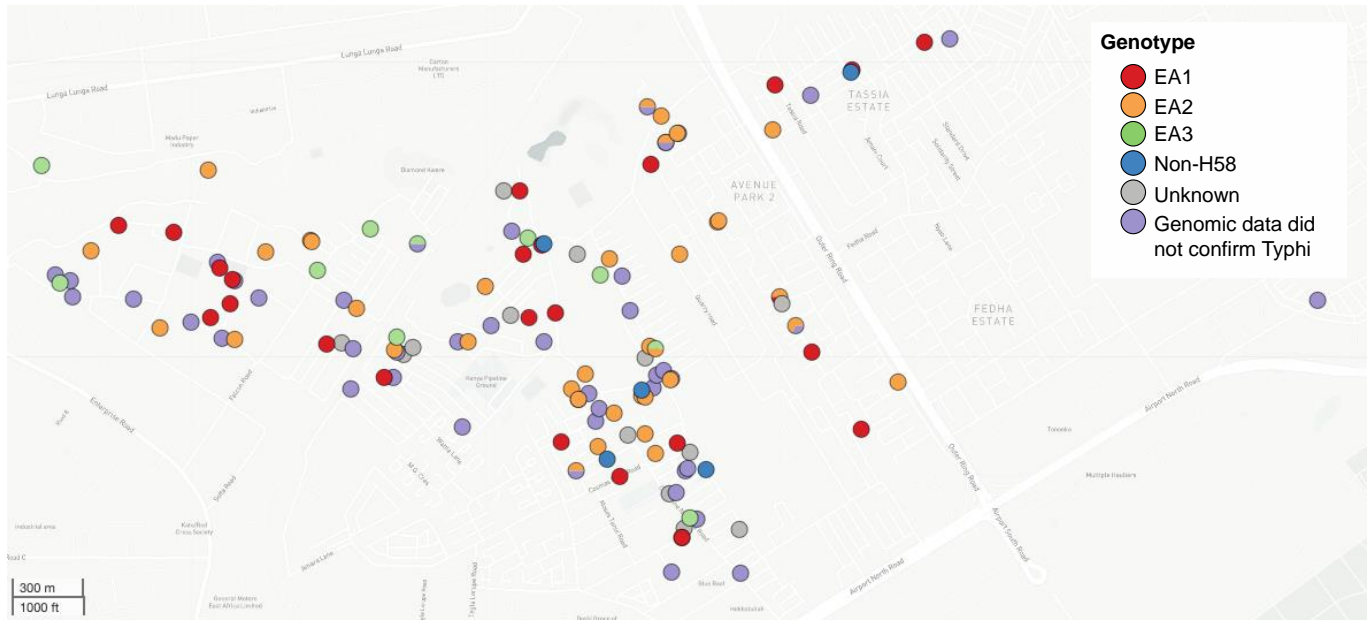

1207

1208

1209

1210 **Supplementary Figure 3**

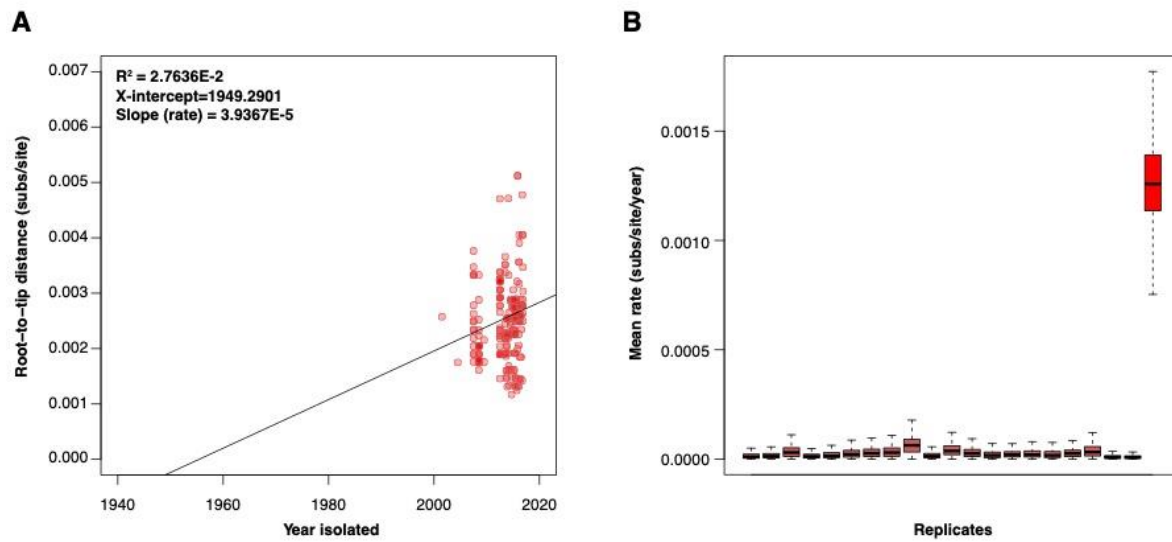

1211

1212

1213

1214

1215

1216

1217 **Supplementary Figure 4**

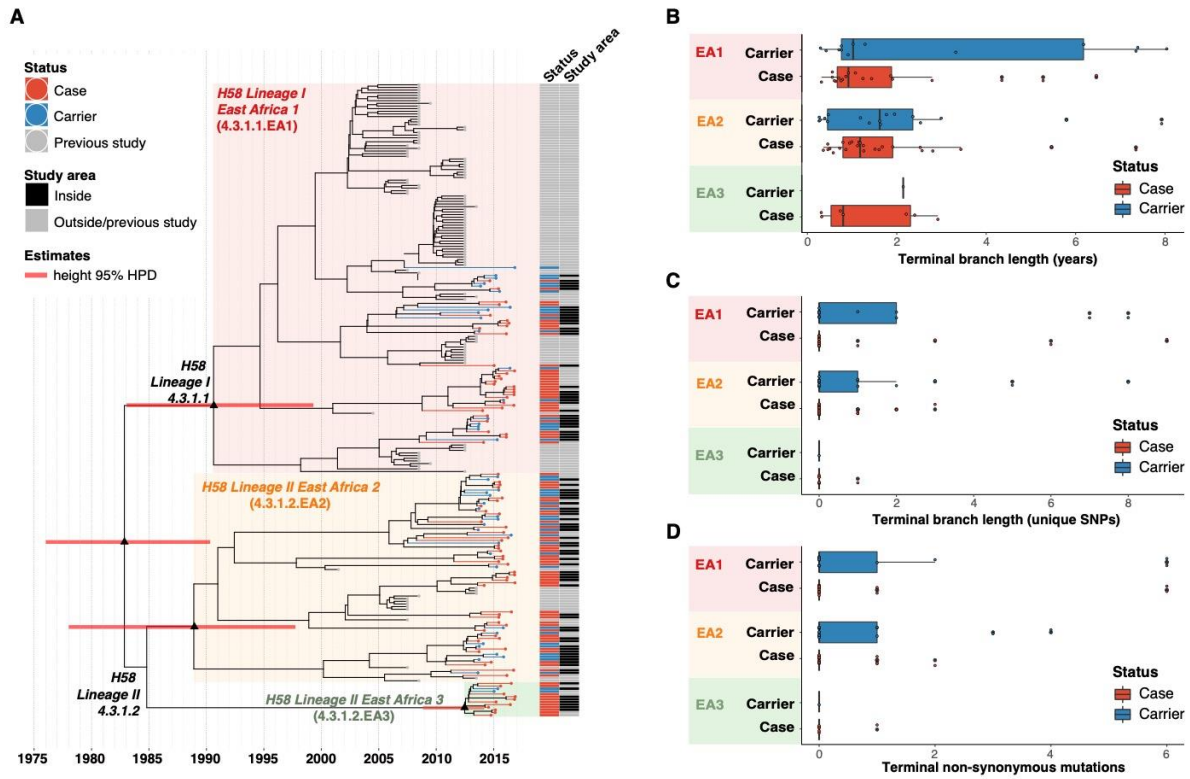

1218

1219

1220

1221

1222

1223

1224

1225

1226

1227

1228

1229

1230

1231

1232 **Supplementary Figure 5**

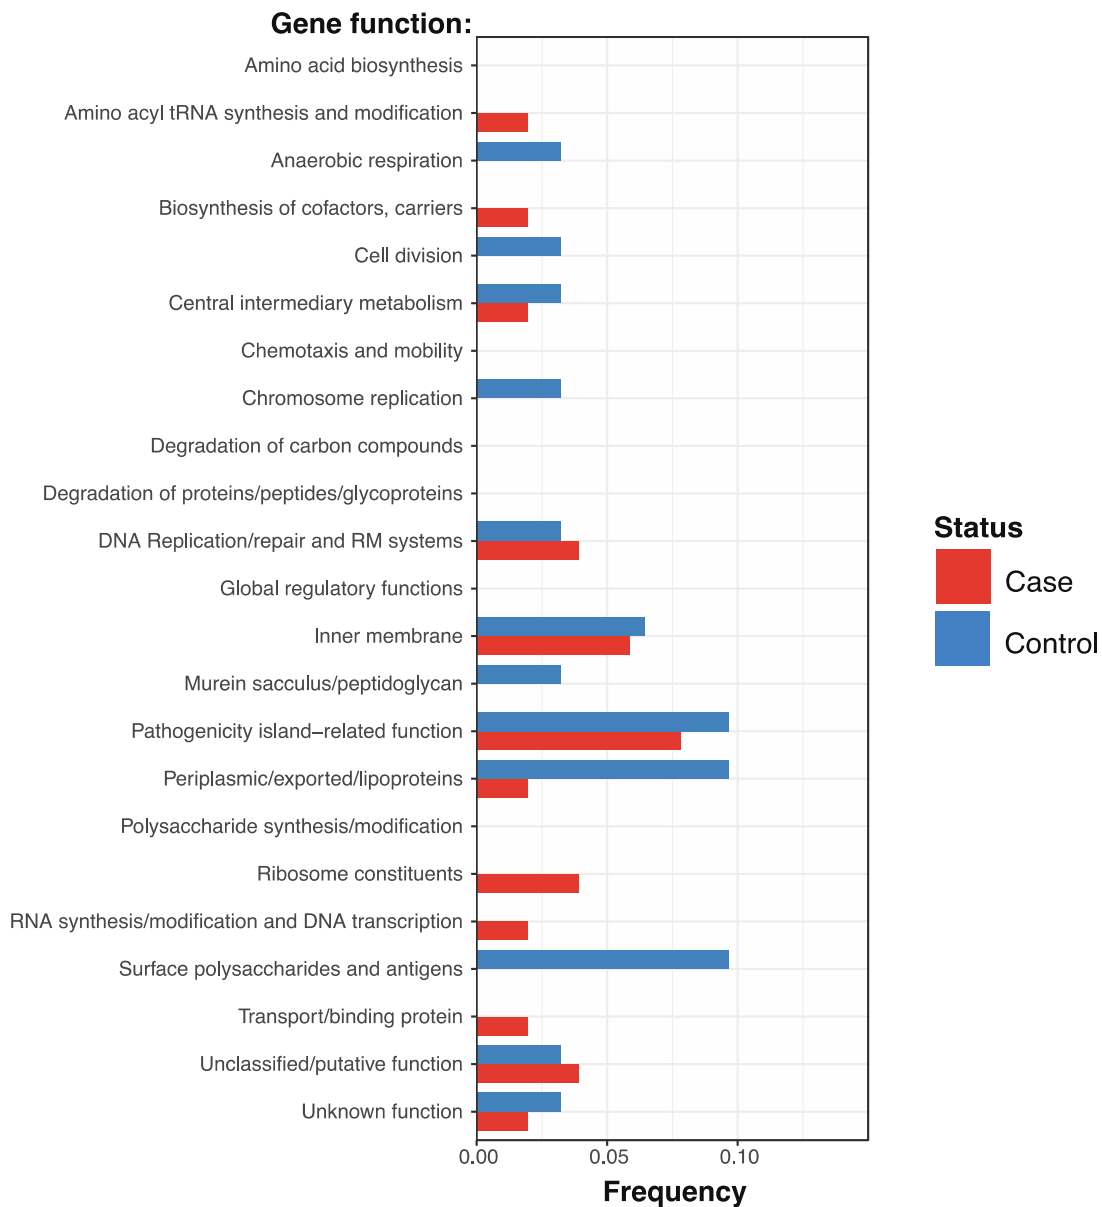

1233

1234

1235

1236 **Supplementary references:**

1237

1238

- 1239 1 Parkhill J, Dougan G, James KD, *et al.* Complete genome sequence of a multiple  
1240 drug resistant *Salmonella enterica* serovar Typhi CT18. *Nature* 2001; **413**: 848–52.

- 1241 2 Langmead B, Salzberg SL. Fast gapped-read alignment with Bowtie 2. *Nat Meth*  
1242 2012; **9**: 357–9.
- 1243 3 Li H, Handsaker B, Wysoker A, *et al.* The Sequence Alignment/Map format and  
1244 SAMtools. *Bioinformatics* 2009; **25**: 2078–9.
- 1245 4 Wong VK, Baker S, Connor TR, *et al.* An extended genotyping framework for  
1246 *Salmonella enterica* serovar Typhi, the cause of human typhoid. *Nat Commun*  
1247 2016; **7**: 12827.
- 1248 5 Britto CD, Dyson ZA, Duchene S, *et al.* Laboratory and molecular surveillance of  
1249 paediatric typhoidal *Salmonella* in Nepal: Antimicrobial resistance and implications  
1250 for vaccine policy. *PLoS Negl Trop Dis* 2018; **12**: e0006408.
- 1251 6 Rahman SIA, Dyson ZA, Klemm EJ, *et al.* Population structure and antimicrobial  
1252 resistance patterns of *Salmonella* Typhi isolates in urban Dhaka, Bangladesh from  
1253 2004 to 2016. *PLoS Negl Trop Dis* 2020; **14**: e0008036.
- 1254 7 Wong VK, Baker S, Pickard DJ, *et al.* Phylogeographical analysis of the dominant  
1255 multidrug-resistant H58 clade of *Salmonella* Typhi identifies inter- and  
1256 intracontinental transmission events. *Nat Genet* 2015; **47**: 632–9.
- 1257 8 Pham Thanh D, Karkey A, Dongol S, *et al.* A novel ciprofloxacin-resistant subclade  
1258 of H58 *Salmonella* Typhi is associated with fluoroquinolone treatment failure. *Elife*  
1259 2016; **5**: e14003.
- 1260 9 Park SE, Pham DT, Boinett C, *et al.* The phylogeography and incidence of multi-  
1261 drug resistant typhoid fever in sub-Saharan Africa. *Nat Commun* 2018; **9**: 5094.
- 1262 10 Holt KE, Thomson NR, Wain J, *et al.* Pseudogene accumulation in the evolutionary  
1263 histories of *Salmonella enterica* serovars Paratyphi A and Typhi. *BMC Genomics*  
1264 2009; **10**: 36.
- 1265 11 Holt KE, Parkhill J, Mazzoni CJ, *et al.* High-throughput sequencing provides  
1266 insights into genome variation and evolution in *Salmonella* Typhi. *Nat Genet* 2008;  
1267 **40**: 987–93.
- 1268 12 Ingle DJ, Nair S, Hartman H, *et al.* Informal genomic surveillance of regional  
1269 distribution of *Salmonella* Typhi genotypes and antimicrobial resistance via  
1270 returning travellers. *PLoS Negl Trop Dis* 2019; **13**: e0007620.
- 1271 13 Croucher NJ, Page AJ, Connor TR, *et al.* Rapid phylogenetic analysis of large  
1272 samples of recombinant bacterial whole genome sequences using Gubbins.  
1273 *Nucleic Acids Res* 2015; **43**: e15–5.
- 1274 14 Stamatakis A. RAxML version 8: a tool for phylogenetic analysis and post-analysis  
1275 of large phylogenies. *Bioinformatics* 2014; **30**: 1312–3.

- 1276 15 Argimon S, Abudahab K, Goater RJE, *et al.* Microreact: visualizing and sharing  
1277 data for genomic epidemiology and phylogeography. *Microbial Genomics* 2016; **2**:  
1278 e000093.
- 1279 16 Yu G, Smith DK, Zhu H, Guan Y, Lam TT-Y. ggtree: an rpackage for visualization  
1280 and annotation of phylogenetic trees with their covariates and other associated  
1281 data. *Methods Ecol Evol* 2016; **8**: 28–36.
- 1282 17 Paradis E, Claude J, Strimmer K. APE: Analyses of Phylogenetics and Evolution in  
1283 R language. *Bioinformatics* 2004; **20**: 289–90.
- 1284 18 Edwards DJ, Duchêne S, Pope B, Holt KE. SNPPar: identifying convergent  
1285 evolution and other homoplasies from microbial whole-genome alignments. *bioRxiv*  
1286 DOI:10.1101/2020.07.08.194480.
- 1287 19 Thanh DP, Thieu NTV, Nguyen Thi Nguyen T, *et al.* Gallbladder carriage generates  
1288 genetic variation and genome degradation in *Salmonella* Typhi. *PLoS Pathog* 2020;  
1289 **16**: e1008998.
- 1290 20 Rambaut A, Lam TT, Max Carvalho L, Pybus OG. Exploring the temporal structure  
1291 of heterochronous sequences using TempEst (formerly Path-O-Gen). *Virus Evol*  
1292 2016; **2**: vew007.
- 1293 21 Suchard MA, Lemey P, Baele G, Ayres DL, Drummond AJ, Rambaut A. Bayesian  
1294 phylogenetic and phylodynamic data integration using BEAST 1.10. *Virus Evol*  
1295 2018; **4**: vey016.
- 1296 22 Duchene S, Holt KE, Weill F-X, *et al.* Genome-scale rates of evolutionary change in  
1297 bacteria. *Microb Genom* 2016; **2**: e000094.
- 1298 23 Firth C, Kitchen A, Shapiro B, Suchard MA, Holmes EC, Rambaut A. Using time-  
1299 structured data to estimate evolutionary rates of double-stranded DNA viruses. *Mol*  
1300 *Biol and Evol* 2010; **27**: 2038–51.
- 1301 24 Kariuki S, Revathi G, Kiiru J, *et al.* Typhoid in Kenya is associated with a dominant  
1302 multidrug-resistant *Salmonella enterica* serovar Typhi haplotype that is also  
1303 widespread in Southeast Asia. *J Clin Microbiol* 2010; **48**: 2171–6.
- 1304 25 Inouye M, Dashnow H, Raven L-A, *et al.* SRST2: Rapid genomic surveillance for  
1305 public health and hospital microbiology labs. *Genome Med* 2014; **6**: 90.
- 1306 26 Carattoli A, Zankari E, García-Fernández A, *et al.* In silico detection and typing of  
1307 plasmids using PlasmidFinder and plasmid multilocus sequence typing. *Antimicrob*  
1308 *Agents Chemother* 2014; **58**: 3895–903.
- 1309 27 Gupta SK, Padmanabhan BR, Diene SM, *et al.* ARG-ANNOT, a new bioinformatic  
1310 tool to discover antibiotic resistance genes in bacterial genomes. *Antimicrob Agents*  
1311 *Chemother* 2014; **58**: 212–20.

- 1312 28 Wick RR, Judd LM, Gorrie CL, Holt KE. Unicycler: Resolving bacterial genome  
1313 assemblies from short and long sequencing reads. *PLoS Comput Biol* 2017; **13**:  
1314 e1005595.
- 1315 29 Wick RR, Schultz MB, Zobel J, Holt KE. Bandage: interactive visualization of de  
1316 novo genome assemblies. *Bioinformatics* 2015; **31**: 3350–2.
- 1317 30 Hawkey J, Hamidian M, Wick RR, *et al.* ISMapper: identifying transposase insertion  
1318 sites in bacterial genomes from short read sequence data. *BMC Genomics* 2015;  
1319 **16**: 667–11.
- 1320 31 Jaillard M, Lima L, Tournoud M, *et al.* A fast and agnostic method for bacterial  
1321 genome-wide association studies: Bridging the gap between k-mers and genetic  
1322 events. *PLoS Genet* 2018; **14**: e1007758.
- 1323 32 Dixon P. VEGAN, a package of R functions for community ecology. *J Veg Sci* 2003;  
1324 **14**: 927–30.
- 1325 33 Accou-Demartin M, Gaborieau V, Song Y, *et al.* Salmonella enterica Serotype  
1326 Typhi with nonclassical quinolone resistance phenotype. *Emerg Infect Dis* 2011;  
1327 **17**: 1091–4.
- 1328 34 Feasey NA, Gaskell K, Wong V, *et al.* Rapid emergence of multidrug resistant,  
1329 H58-lineage Salmonella typhi in Blantyre, Malawi. *PLoS Negl Trop Dis* 2015; **9**:  
1330 e0003748.
- 1331  
1332
