# **Multiple introductions of multidrug-resistant typhoid associated with acute infection and asymptomatic carriage, Kenya**

\*Samuel Kariuki<sup>1,2</sup>, \*Zoe A Dyson<sup>2,3,4,5</sup>, Cecilia Mbae<sup>1</sup>, Ronald Ngetich<sup>1</sup>, Susan M Kawai<sup>1</sup>, Celestine Wairimu<sup>1</sup>, Stephen Anyona<sup>1</sup>, Naomi Gitau<sup>1</sup>, Robert Onsare<sup>1</sup>, Beatrice Ongandi<sup>1</sup>, Sebastian Duchene<sup>6</sup>, Mohamed Ali<sup>7</sup>, John Clemens<sup>8</sup>, \*Kathryn E Holt<sup>4,5</sup>, \*Gordon Dougan<sup>3</sup>

## **Affiliations:**

1. Centre for Microbiology Research, Kenya Medical Research Institute, Kenya.
2. Wellcome Sanger Institute, Wellcome Genome Campus, Hinxton, Cambridge, United Kingdom
3. Cambridge Institute of Therapeutic Immunology & Infectious Disease (CITIID), Department of Medicine, University of Cambridge, Cambridge, UK.
4. London School of Hygiene & Tropical Medicine, London WC1E 7HT, UK
5. Department of Infectious Diseases, Central Clinical School, Monash University, Melbourne, Victoria 3004, Australia
6. Department of Microbiology and Immunology, The University of Melbourne at The Peter Doherty Institute for Infection and Immunity, Melbourne, VIC, Australia
7. Department of International Health, John's Hopkins University, USA.
8. International Diarrheal Diseases Research Centre, Dhaka, Bangladesh.

\*Indicates equal contribution

Corresponding author:

Prof Samuel Kariuki

Director, Research and Development, KEMRI, Kenya

Address: Off Mbagathi Road, Nairobi, PO Box 54840-00200, Nairobi, Kenya

Mobile: +254-722-232467; Email address: [Samkariuki2@gmail.com](mailto:Samkariuki2@gmail.com)/[skariuki@kemri.org](mailto:skariuki@kemri.org)

## Abstract

Understanding the dynamics of infection and carriage of typhoid in endemic settings is critical to finding solutions to prevention and control. In a 3 year case-control study, we investigated typhoid among children aged <16 years (4,670 febrile cases and 8,549 age matched controls) living in an informal settlement, Nairobi, Kenya. 148 *S. Typhi* isolates from cases and 95 from controls (stool culture) were identified; a carriage frequency of 1%. Whole-genome sequencing showed 97% of cases and 88% of controls were genotype 4.3.1 (Haplotype58), with the majority of each (76% and 88%) being multidrug-resistant strains in 3 sublineages of H58 genotype (East Africa 1 (EA1), EA2, and EA3), with sequences from cases and carriers intermingled. The high rate of multidrug-resistant H58 *S. Typhi*, and the close phylogenetic relationships between carriers and controls, provides evidence for the role of carriers as a reservoir for the community spread of typhoid in this setting.

## Introduction

Typhoid fever, caused by *Salmonella enterica* serovar Typhi (*S. Typhi*) is estimated to involve ~21.7 million illnesses and 216,000 deaths annually <sup>1,2</sup>, with most of these occurring in lower and middle-income countries. In Africa, overall typhoid is now estimated to have an average annual pooled incidence rate of 112.1 (95% CI, 46.7–203.5) cases per 100,000 people <sup>3,4</sup> with a case fatality rate (CFR) of 5.4% (2.7-8.9)<sup>5</sup>.

Control of typhoid is impeded by asymptomatic carriage, which historically was estimated to account for 2-5% of individuals infected<sup>6-8</sup>. However, there is a paucity of recent data on the frequency of carriers in different settings including sub-Saharan Africa (SSA) as well as the extent to which they contribute to disease transmission<sup>9</sup>. A recent modelling study using data generated in Blantyre, Malawi, identified multidrug resistant (MDR) *S. Typhi* and/or the emergence of the lineage known as H58 (genotype 4.3.1) as a primary driver of an increasing number of typhoid fever cases. In this study, an estimated 45-95% of typhoid transmission was attributed to carriers<sup>10,11</sup>. *S. Typhi* H58<sup>12</sup> is a globally disseminated clade frequently associated with MDR (defined as resistance to chloramphenicol, ampicillin and co-trimoxazole) and an increasing frequency of reduced susceptibility to fluoroquinolones. H58 *S. Typhi* are rapidly displacing other lineages in many endemic areas<sup>12-15</sup> and a new subclade that is extensively drug resistant (XDR), displaying resistance to ciprofloxacin and fluoroquinolones in addition to MDR, has been described in Pakistan<sup>16</sup>.

Recent reports of epidemics of typhoid fever in SSA suggest that the disease may be becoming more widespread in the region<sup>1,15,17-20</sup>. In Kenya, the rapid growth of population has led to a huge rural-to-urban migration with people increasingly living in informal settlements where clean water and good sanitation are a major challenge<sup>21,22</sup>. The incidence of typhoid in one such informal settlement, Kibera in Nairobi, was estimated at 247 cases per 100,000 with the highest rates in children 5-9 years old (596 per 100,000)<sup>23</sup>. For the last two decades the majority of cases of typhoid in Kenya have been MDR, with reduced susceptibility to fluoroquinolones rising in frequency<sup>14,15,24</sup>.

Previously, we showed that *S. Typhi* H58 gained a foothold in Kenya in the 1990s, constituting >75% of the circulating *S. Typhi* we have characterized since 2001<sup>14</sup>. Two H58 lineages were detected; lineage I being isolated between 1988-2008 and lineage II from 2004 onwards. We have previously observed carriage rates of 6% in households where typhoid cases were detected<sup>14</sup>, however these *S. Typhi* isolates were not characterized genetically and the role of asymptomatic carriers in transmission dynamics of typhoid in the community is still poorly understood. Over the past 7 years we have been intensively studying typhoid and other invasive bacterial diseases in Mukuru, an informal settlement 15 km east of the city of Nairobi, Kenya. The prevalence of *S. Typhi* infections among 16,236 children was 1.4% (CI: 1.2-1.6%), and higher amongst males (1.8% vs. 1.2% for females), with a high proportion of infections noted among older children 5-8 years in age<sup>25</sup>. Risk factors predictive of *S. Typhi* infection in Mukuru were multiple but were predominantly associated with contaminated water sources and sanitation issues<sup>25</sup>. Here, we analysed typhoid cases in Mukuru clinically and microbiologically, and identified frequent asymptomatic carriage among children below 16 years of age. By exploiting whole genome sequencing (WGS) and geospatial mapping we characterised the population structure and transmission dynamics of *S. Typhi* in this location.

## Materials and Methods

### *Study site*

Mukuru informal settlement is situated East of Nairobi city, about 15 km from the city centre. It is one of the largest slums in the city with a population of around 250,000

people<sup>26</sup>. The informal settlement is made up of improvised temporary dwellings often made from scrap materials, such as corrugated metal sheets, plywood, and polythene-sheets<sup>27</sup>. In addition to poverty, a number of factors associated with informal settlements, including overcrowding, substandard housing, unclean and insufficient quantities of water, and inadequate sanitation, contribute to a high incidence of infectious diseases and increased mortality among children under five years<sup>21,28</sup>.

Mukuru informal settlement is divided into eight villages; Mukuru Lunga-Lunga, Mukuru kwa Sinai, Mukuru kwa Ruben, Mukuru kwa Njenga, Mukuru Kayaba, Fuata Nyayo, Jamaica, and Mukuru North. This study was carried out in two of the large villages, Mukuru kwa Njenga and Mukuru kwa Ruben, with a combined population of 150,000. Spatial mapping of the two villages was conducted using the Universal Transverse Mercator system<sup>29</sup>, and patient details collected as described previously<sup>25</sup>.

The two villages in the informal settlement are served by three outpatient clinics: Ruben Health Centre located in the Ruben village (zone named Simba cool, serves approximately 30% of the population), Missionaries of Mary Located in Kwa Njenga village (zone named Vietnam, serves approximately 45% of the population), and County Government Clinic in Kwa Njenga village (Zone named MCC and serves approximately 25% of the population). The fourth site, Mbagathi District Hospital, is located on the western side of Nairobi city, 5 km from city centre and was used as a referral facility. Participants living outside of the mapped demographic surveillance site (DSS) who came to seek medical services in any of the three study site health facilities or at

Mbagathi District Hospital were included for the purpose of tracking typhoid cases and carriers treated at the facilities, but are reported separately in the results section.

### ***Recruitment of clinical typhoid fever cases and asymptomatic typhoid carriers***

Typhoid fever cases and asymptomatic carriers presented in this study were identified and recruited as part of a larger study on surveillance and genomics of invasive *Salmonella* disease in children and young adults less than 16 years of age<sup>25,30</sup>.

Children presenting as outpatients at the three study clinics and Mbagathi District Hospital between August 2013 and November 2016 were triaged to identify those with fever, headache and/or diarrhoea for recruitment into the study as potential cases.

Patients with current fever ( $\geq 38^{\circ}\text{C}$ ) and reportedly febrile for  $\geq 3$  days were considered potential typhoid cases and assessed via blood culture. The primary typhoid case definition (data presented in **Table 1**) was children aged 0-16 years with  $\geq 3$  days fever  $\geq 38^{\circ}\text{C}$  and positive blood or stool culture for *S. Typhi* (see bacterial culture methods below).

During the study period, age-matched controls were recruited from children without current fever or diarrhoea attending the same health facilities for healthy mother and child clinics (e.g. for vaccination and nutritional advice). Those with *S. Typhi* positive stool culture were designated as asymptomatic typhoid carriers as described previously<sup>25</sup>. Hence, the inclusion criteria for asymptomatic typhoid carriers (data presented in **Table 1**) were children aged 0-16 years with no diarrhoea, no current fever, and no recent fever history, with stool culture positive for *S. Typhi* (see bacterial culture

methods below). The total number of participants was computed on the basis of a 4% prevalence rate of typhoid from previous study<sup>14</sup>. (A structured questionnaire was used to collect demographic data for both cases and controls recruited into the study as described previously<sup>25</sup>.

All isolates cultured from participants and identified as *Salmonella* were archived and later revived for WGS as detailed below. The sequence data revealed some mis-identification of *Salmonella* serotypes (**Fig. 1 and Table S1**), hence for genomic analyses we included all cases and controls whose cultures were found to be *S. Typhi* positive by WGS rather than those identified as *S. Typhi* positive by serotype in the microbiology laboratory.

### ***Bacterial culture***

For blood culture, 1-3 mL for children <5 years of age and 5-10 mL for those 5-16 years of age was collected in a syringe, placed into Bactec media bottles (Becton-Dickinson, New Jersey, USA), incubated at 37°C in a computerized BACTEC™ 9050 Blood Culture System (Becton-Dickinson), and subcultured after 24-48 h onto blood, chocolate and MacConkey agar (Oxoid, Basingstoke, UK) plates. For stool culture, rectal swabs or stool samples were obtained from each potential carrier and cultured on selenite F (Oxoid) broth aerobically at 37°C overnight. Broth cultures were then subcultured on MacConkey agar and *Salmonella-Shigella* agar (Oxoid) and incubated at 37°C overnight. Blood and stool isolates were identified using a series of standard biochemical and serological tests as described previously<sup>25</sup>.

## **Antimicrobial susceptibility testing**

Antimicrobial susceptibility testing was performed using the disk diffusion technique for ampicillin 10 µg, tetracycline 30 µg, co-trimoxazole 25 µg, chloramphenicol 30 µg, cefpodoxime 30 µg, ceftazidime 30 µg, ceftriaxone 30 µg, cefotaxime 30 µg, ciprofloxacin 5 µg and nalidixic acid 10 µg as described previously<sup>25</sup>. Results were interpreted according to the 2017 guidelines provided by the Clinical and Laboratory Standards Institute (CLSI)<sup>31</sup>.

## **Whole genome sequencing**

All *Salmonella* isolated from cases and controls were subcultured at the end of the study for DNA extraction and WGS. These included 243 cultures identified as *S. Typhi* from cases (85 from blood and 63 from stool) and 95 from controls (all from stool) (see **Fig. 1** and **Table S1**), which are the subject of this study (non-typhoidal *Salmonella* data is reported elsewhere<sup>30</sup>). Twelve *S. Typhi* case isolates and 10 control isolates could not be revived and were not further analysed. DNA was extracted using the Wizard Genomic DNA Extraction Kit (Promega, Wisconsin, USA) and shipped on ice to the Wellcome Sanger Institute for sequencing using the Illumina platform as described previously<sup>15</sup>. A total of 217 *S. Typhi* DNA samples were successfully sequenced (two were of insufficient quality to construct sequencing libraries, or failed sequencing). Non-*S. Typhi* bacterial DNA sequences were detected in 75 samples (34.6%; organisms detected are shown in **Table S1**), and 11 sequences originally identified as other *Salmonella* serotypes were later found to be *S. Typhi* with genomic data. Two



sequences showed the presence of *S. Typhi*, but at low depth, and were subsequently omitted from further genomic analyses, leaving genome data for 153 *S. Typhi* isolates for further analysis.

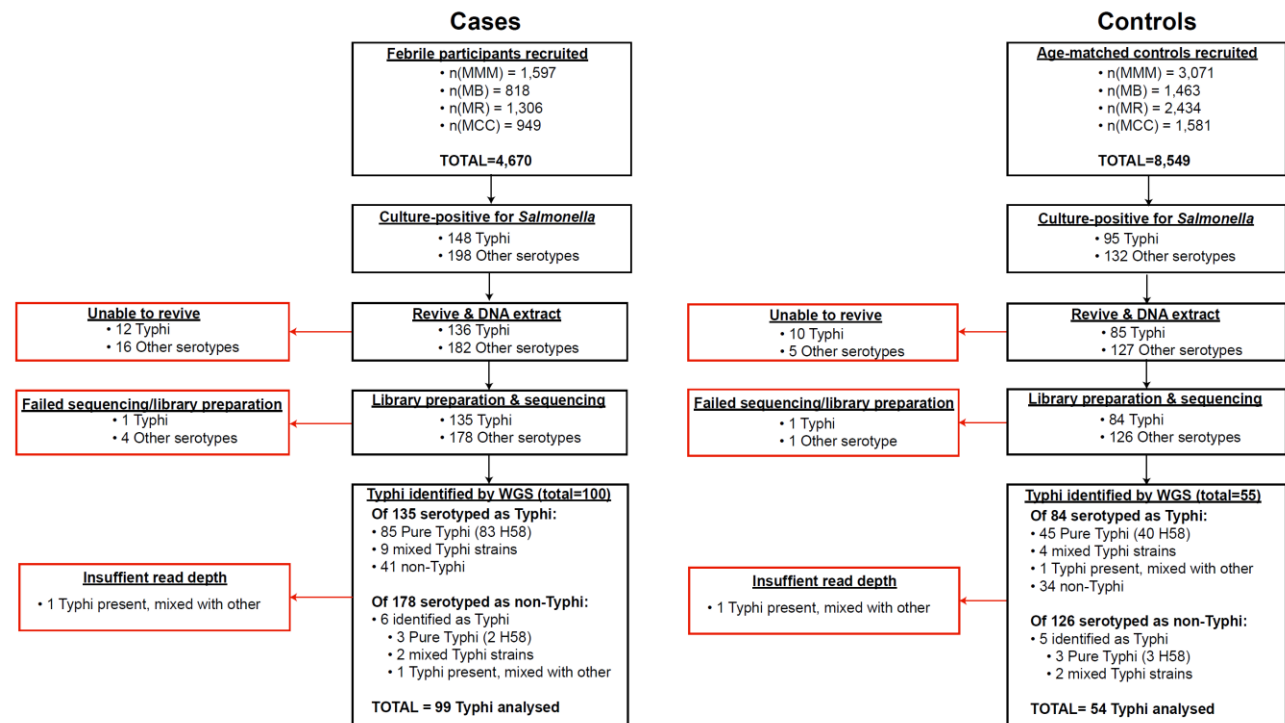

**Fig. 1. Flow chart of samples collected and analysed.** Red boxes indicate bacterial isolates that could not be included in downstream genetic analyses, grouped by reason for exclusion.

## Phylogenetic and SNP analysis of *S. Typhi* isolates

For SNP analysis, paired-end reads from 153 *S. Typhi* isolates were mapped to the reference sequence of *S. Typhi* CT18 (accession number: AL513382)<sup>32</sup> using the RedDog mapping pipeline (v1beta.10.3), available at <http://github.com/katholt/reddog> and detailed in **supplementary methods**. Read alignments were used to assign isolates to previously defined lineages according to the extended genotyping framework

<sup>33,34</sup> with the GenoTyphi pipeline (available at <http://github.com/katholt/genotypi>).

Unique SNPs defining three novel lineages were identified from the genome-wide SNP allele table and added to the GenoTyphi scheme to facilitate easy identification of these lineages in future studies (details in **supplementary methods and results**).

Phylogenetic analyses were restricted to WGS-confirmed pure cultures of *S. Typhi* H58 (genotype 4.3.1, n=128). For some analyses, an additional 1,076 *S. Typhi* H58 genomes from previously published WGS studies of global and African isolates <sup>12,15,33,35</sup> were also included for context, along with 61 non-H58 genomes for phylogenetic outgroup rooting, using the same mapping approach detailed above (see **Table S2** for full list of genomes analysed and their public data accessions). SNPs called in phage regions or repetitive sequences were filtered from the alignment (details in **supplementary methods**), and any further recombinant regions identified and removed with Gubbins (v2.3.2) <sup>36</sup>. This resulted in a final set of 8,635 SNPs. From this global alignment we extracted a separate SNP alignment for the set of 239 Kenyan *S. Typhi* 4.3.1 genomes (n=128 from this study and n=111 from published studies, see **Table S3** <sup>15,33</sup>), the resulting alignment of length 489 SNPs was used for temporal analyses (described below and in **supplementary methods**).

Maximum likelihood (ML) phylogenetic trees were inferred from SNP alignments using RAxML (v8.2.9) <sup>37</sup> (as detailed in **supplementary methods**) and the resulting trees were visualized using Microreact (interactive global H58 phylogeny available at: <https://microreact.org/project/wViqmaRdZuFVEb6yk4i1jU>) <sup>38</sup>.

Pairwise SNP distances were calculated from the SNP alignment using the `dist.dna()` function in the R package *ape* (v5.4.1)<sup>39</sup>. Terminal branch lengths were extracted from phylogenies using R package *ggtree* (v2.2.4)<sup>40</sup>. Non-synonymous mutations occurring in terminal branches were detected using SNPPar (v0.4.2dev)<sup>41</sup> and grouped by function based on the gene in which they were found, according to the functional classification scheme in the genome annotation of *S. Typhi* CT18<sup>8,32</sup>.

### ***Phylogenetic analysis***

To investigate temporal signal and date the introduction of *S. Typhi* H58 into Kenya based on the 239 available Kenyan genomes (n=128 from this study, and n=111 from previous studies<sup>15,33</sup>), we used several methods. First, we used TempEst (v1.5.1)<sup>42</sup> to assess temporal structure (i.e. clock-like evolution) by conducting a regression analysis of the root-to-tip branch distances of the ML tree as a function of sampling date, and later a date-randomisation test (full details of temporal signal assessment and model selection are provided in **supplementary methods**). To estimate divergence dates for the three *S. Typhi* H58 sublineages we detected in Kenya (EA1-3), we used BEAST (v1.10)<sup>43</sup> to fit a phylodynamic model to the SNP alignment and isolation dates as described in **supplementary methods**. The resultant MCC tree was visualized using *ggtree* (v2.2.4)<sup>40</sup> and Microreact<sup>38</sup> (interactive phylogeny available at: <https://microreact.org/project/I2KUoasUB>).

### ***Genomic determinants of antimicrobial resistance***

The read mapping-based allele typer SRST2 (v0.2.0)<sup>44</sup> was used to detect the presence of plasmid replicons (PlasmidFinder database<sup>45</sup>) and antimicrobial resistance

(AMR) genes (ARGannot database<sup>46</sup>). Where AMR genes were observed without evidence of a known AMR plasmid, raw read data was assembled using Unicycler (v0.4.7)<sup>47</sup> and then examined using Bandage (v0.8.1)<sup>48</sup> to confirm the chromosomal location and composition of AMR-associated transposons. ISMapper (v2.0)<sup>49</sup> was also used to identify the location of IS1 insertion sequences in the *S. Typhi* chromosome as described in **supplementary methods**. Point mutations located within the quinolone resistance determining region (QRDR) of genes *gyrA*, *gyrB*, and *parC* associated with reduced susceptibility to fluoroquinolones<sup>35</sup> were detected using GenoTyphi<sup>33,34</sup> as detailed in **supplementary methods**.

### ***Statistical and spatial analysis***

All statistical analyses unless otherwise stated were carried out using R (v4.0.2). Details of specific functions within R packages used for individual analyses are available in **supplementary methods**.

### ***Nucleotide sequence and read data accession numbers***

Raw Illumina sequence reads have been submitted to the European Nucleotide Archive (ENA) under accession PRJEB19289. Individual sequence accession numbers are listed in **Table S1**.

### ***Ethical Considerations***

The study was approved by the Scientific and Ethics Review Unit (SERU) of the Kenya Medical Research Institute (KEMRI) (Scientific Steering Committee No. 2076). All

parents and/or guardians of participating children were informed of the study objectives and voluntary written consent was sought and obtained before inclusion. A copy of the signed consent was filed and stored in password protected cabinets at KEMRI.

## Results

### *Detection of S. Typhi cases and asymptomatic carriers*

From August 2013-November 2016, a total of 4,670 febrile children were recruited across the four study sites and subjected to blood and/or stool culture. *S. Typhi* was identified in cultures from 148 children (3.2%); the annual rate was steady over the study period but significantly higher amongst males (4.0% vs 2.3%,  $p=0.0008$ , see **Table 1**). The odds of *S. Typhi* positive culture increased significantly with age (OR 1.08,  $p=0.0005$ ) but the effect was restricted to males (see **Table 1**), amongst whom the isolation rate was 1.3% in those  $\leq 1$  year, 2.0% in those aged 1-7 years, and 3.4% in those  $>7$  years old (compared with 0.95%, 1.1% and 0.94%, respectively amongst females). A total of 8,549 age-matched control participants (with no current diarrhoea and no recent fever history) were recruited and subjected to stool culture. *S. Typhi* was identified in cultures from  $n=95$  (1.1%); these are considered asymptomatic carriers. *S. Typhi* culture positivity amongst controls was not significantly associated with age or sex and was stable over the study period (see **Table 1 and Table S4**). No significant statistical association was found between phenotypic or genotypic AMR patterns and case/control status, age, or sex.

### **Table 1. Culture positive typhoid cases and asymptomatic carriers**

|                                                                        | Cases          | Controls 295  |
|------------------------------------------------------------------------|----------------|---------------|
| <b>Participants tested, N</b>                                          | 4,670          | 8,549         |
| Male, N (%)                                                            | 2,497 (53.5%)  | 4,260 (49.8%) |
| Female, N (%)                                                          | 2,173 (46.5%)  | 4,289 (50.2%) |
| <b>S. Typhi culture positive, N (%)</b>                                | 148 (3.2%)     | 95 (1.1%)     |
| Male, N (%)                                                            | 99 (4.0%)      | 49 (1.15%)    |
| Female, N (%)                                                          | 49 (2.3%)      | 46 (1.1%)     |
| <b>WGS confirmed S. Typhi, N (%)</b>                                   | 100 (2.1%)     | 55 (0.64%)    |
| <b>Logistic regression for S. Typhi culture positive</b>               |                |               |
| Year of isolation, OR (p-value)                                        | 1.19 (0.072)   | 0.94 (0.586)  |
| Male Sex, OR (p-value)                                                 | 1.81 (0.0008*) | 1.08 (0.699)  |
| Age in years, OR (p-value)                                             | 1.08 (0.0005*) | 1.02 (0.403)  |
| <b>Logistic regression for S. Typhi culture positive, males only</b>   |                |               |
| Year of isolation, OR (p-value)                                        | 1.19 (0.147)   | 1.09 (0.576)  |
| Age in years, OR (p-value)                                             | 1.11 (0.0001*) | 1.06 (0.082)  |
| <b>Logistic regression for S. Typhi culture positive, females only</b> |                |               |
| Year of isolation, OR (p-value)                                        | 1.19 (0.296)   | 0.81 (0.158)  |
| Age in years, OR (p-value)                                             | 1.03 (0.551)   | 0.98 (0.534)  |

Note the values reported for logistic regressions are from multivariate models including all indicated covariates, fit separately for cases and controls.

## Global population structure and antimicrobial resistance profiles of Kenyan S.

### Typhi

The presence of S. Typhi was confirmed by WGS in 94 cases (64%) and 50 controls (53%) that were originally identified as S. Typhi via microbiological culture (**Fig. 1, Table S1**). S. Typhi genotype 4.3.1 (H58) was dominant throughout the study (n=145, 95%), amongst both cases and controls (**Table 2**). Five other genotypes were detected: 2.2.2 (n=1), 2.5.0 (n=3), 3.0.0 (n=3), and 4.1.1 (n=1), see **Table 2**.

**Table 2. Genotypes and AMR profiles for 153 sequenced S. Typhi isolates**

| Genotype | Cases | Controls | MDR | GyrA mutation | GyrB |
|----------|-------|----------|-----|---------------|------|
|----------|-------|----------|-----|---------------|------|

|                      |          |          |          |            |          |           |          | mutation   |
|----------------------|----------|----------|----------|------------|----------|-----------|----------|------------|
|                      |          |          | Plasmid  | Chromosome | S83F     | S83Y      | D87G     | S464F      |
| All                  | 99       | 54       | 83       | 33         | 3        | 17        | 2        | 75         |
| 2.2.2                | 0        | 1 (1.9%) | 0        | 0          | 0        | 0         | 0        | 0          |
| 2.5.0                | 1 (1.0%) | 2 (3.7%) | 0        | 0          | 0        | 0         | 0        | 0          |
| 3.0.0                | 2 (2.0%) | 1 (1.9%) | 0        | 0          | 0        | 0         | 0        | 0          |
| 4.1.1                | 0        | 1 (1.9%) | 0        | 0          | 0        | 0         | 0        | 0          |
| 4.3.1 (H58)          | 96 (97%) | 49 (91%) | 83 (57%) | 33 (23%)   | 4 (2.8%) | 19 (13%)  | 2 (1.4%) | 75 (51.7%) |
| <b>H58 subgroups</b> |          |          |          |            |          |           |          |            |
| EA1 (L1)             | 35 (35%) | 20 (37%) | 29 (53%) | 17 (31%)   | 4 (7.3%) | 2 (3.6%)  | 2 (3.6%) | 2 (3.6%)   |
| EA2 (L2)             | 46 (46%) | 27 (50%) | 54 (74%) | 0          | 0        | 0         | 0        | 73 (100%)  |
| EA3 (L2)             | 15 (15%) | 2 (3.7%) | 0        | 16 (94%)   | 0        | 17 (100%) | 0        | 0          |

Percentages indicate genotype frequencies amongst cases or controls (first two columns); or frequency of antimicrobial resistance determinants amongst isolates of a given genotype (remaining columns). MDR, multi-drug resistant; L1, lineage I; L2, lineage II.

The few non-H58 isolates (**Table 2**) lacked any known AMR determinants. In contrast, the majority of H58 isolates were MDR (n=116, 80%), often carrying acquired genes conferring resistance to ampicillin (*bla*TEM-1), chloramphenicol (*catA1*), co-trimoxazole (*dfrA7* plus *sul1* and/or *sul2*) and streptomycin (*strAB*). In 33 genomes (23% of H58), these genes were carried by a Tn2670-like complex transposable element inserted in the chromosome as reported previously in the region<sup>12,13,15</sup>. The remaining 83 MDR genomes (57% of H58) carried a closely related Tn2670-like transposon located within an IncHI1 plasmid, which in all but one isolate also carried an additional tetracycline resistance gene (*tetB*). The IncHI1 plasmids were genotyped as plasmid sequence type 6 (PST6), which is associated with MDR H58 in East Africa and South Asia<sup>12,15,50</sup>. Thus, the observed AMR phenotypes (n=128 H58 and n=8 non-H58 genome sequences) corresponded to the presence of known molecular determinants of AMR. Estimates of sensitivity and specificity of AMR genotyping are presented in **Table S5**

and **supplementary results**. No statistical association was observed between the presence of MDR genes or QRDR mutations shown in **Table 2** and case/control status, age, or sex.

### **Local subpopulations of S. Typhi H58**

S. Typhi H58 (genotype 4.3.1) can be subdivided into lineages I (genotype 4.3.1.1) and II (genotype 4.3.1.2). Lineage II was more common in this setting than lineage I: n=90 (62.1% of H58) vs n=55 (37.9%). Examination of the global phylogeny (**Fig. 2**, and online interactive version <https://microreact.org/project/wVigmaRdZuFVEb6yk4i1jU>) revealed all H58 lineage I isolates from this study shared a most recent common ancestor (mrca) whose descendants form a monophyletic clade that exclusively comprised S. Typhi from East African countries (see **Fig. 2**), here defined as H58 sublineage EA1 (East Africa 1) with genotype designation 4.3.1.1.EA1 (labelled in **Fig. 2**).

S. Typhi H58 lineage II (genotype 4.3.1.2) isolates from our study belonged to two distinct clades of the global phylogeny (**Fig. 2**), which were each exclusively populated by East African isolates. The largest of these clades (n=80 isolates, of which 81.3% derive from the current study) formed a monophyletic group nested within a deeper clade of diverse South Asian isolates (see **Fig. 2**), and corresponds to the previously reported introduction of H58 lineage II into Kenya from South Asia <sup>12</sup>. This lineage, here defined as H58 sublineage EA2 (East Africa 2) is designated genotype 4.3.1.2.EA2 (labelled in **Fig. 2**). The smaller East African H58 lineage II clade (n=43 isolates) is



designated genotype 4.3.1.2.EA3 (labelled in **Fig. 2**) and comprised two sister clades, separated by  $\geq 13$  SNPs: one involving isolates from Kenya ( $n=13$ , all from this study) and the other isolates from Uganda ( $n=30$ ), which accounted for 100% of the typhoid burden at the Ugandan site where they were identified (see **Fig. 2**). All three East African H58 genotypes have been added to the GenoTyphi scheme using unique marker SNPs and further details on these are provided in **supplementary results**.

The three East African H58 subgroups circulating in our setting all had high rates of MDR (84%, 74% and 94%, respectively); however, in EA2, MDR was exclusively associated with the PST6-IncHI1 plasmid, and in EA3 exclusively with the chromosomal insertion (see **Table 2, Fig. 2** and **supplementary results**). In EA1, most MDR was associated with the PST6-IncHI1 plasmid. However, a subclade of isolates (associated with spread to Tanzania and Malawi) carried the chromosomal insertion instead (see **Table 2, Fig. 2, supplementary methods**).

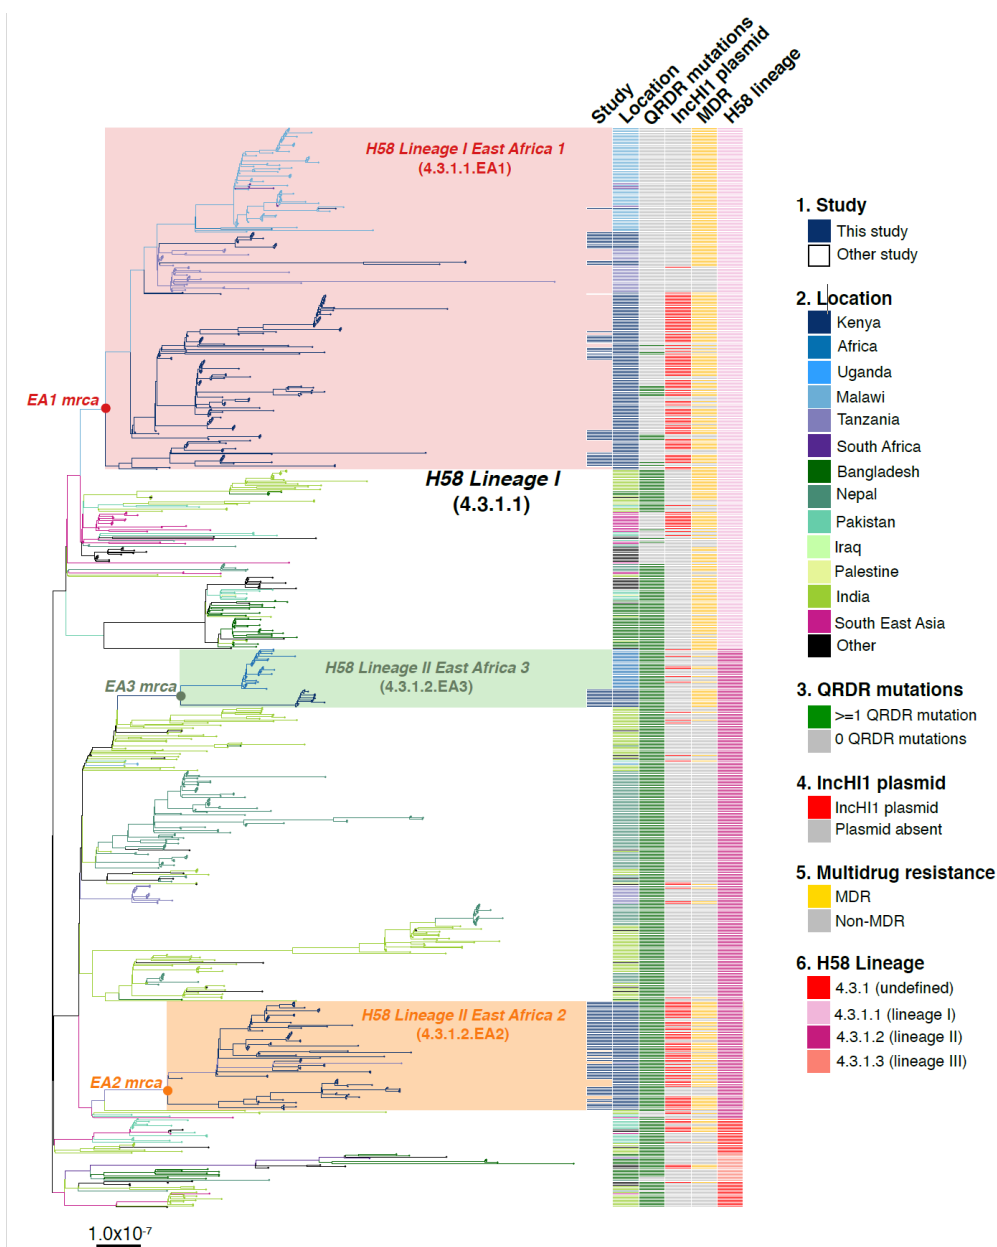

**Fig. 2. Global population structure of H58 (4.3.1) *S. Typhi* showing Kenyan isolates cluster into three East African clades.** Whole genome phylogeny of 1,204 H58 isolates, including all available Kenyan genomes (n=128 from this study, n=111 from prior studies) and globally distributed genomes for context (n=965, see **Methods**). Branch lengths are in substitutions per core-genome site, branches are coloured to indicate geographical origin (see inset legend), shaded boxes highlight the three East African H58 clades defined in this study. Colour bars to the right indicate (as per inset legend): 1, Kenyan strains isolated and sequenced during this study; 2, geographical location; 3, mutation(s) in the quinolone resistance determining region (QRDR) of genes *gyrA*, *gyrB*, and *parC*; 4, presence of multidrug resistance (MDR) IncHI1 plasmid; 5, presence of MDR genes; 6, H58 lineage. Interactive version available at <https://microreact.org/project/wViqmaRdZuFVEb6yk4i1jU>.

# ***Distribution of S. Typhi genotypes amongst individuals***

No statistically significant differences in genotype distribution were observed between cases and controls ( $p=0.077$ , using Chi-squared test, data in **Table 2**), or between males and females ( $p=0.37$ , using Chi-squared test, data in **Table S6**), consistent with symptomatic and asymptomatic infections being drawn from the same general circulating pool of pathogens. The distribution of genotypes amongst cases varied by age group ( $p=0.01$ , using Chi-square test), with the frequency of EA1 declining with age and the overall diversity increasing with age (**Table 3**). No significant differences in age groups was evident amongst controls ( $p=0.9$  using Chi-square test, see **Table 3**).

**Table 3. S. Typhi genotypes associated with n=153 cases and controls among different age groups**

|                               | Age group |           |           |
|-------------------------------|-----------|-----------|-----------|
|                               | ≤1 year   | 1-7 years | >7 years  |
| <b>WGS-confirmed cases</b>    | <b>7</b>  | <b>66</b> | <b>26</b> |
| EA1                           | 5 (71%)   | 24 (36%)  | 6 (23%)   |
| EA2                           | 1 (14%)   | 34 (52%)  | 11 (42%)  |
| EA3                           | 0         | 8 (12%)   | 7 (27%)   |
| non-H58                       | 1 (14%)   | 0         | 2 (78%)   |
| Shannon diversity             | 0.80      | 0.97      | 1.25      |
| <b>WGS-confirmed carriers</b> | <b>4</b>  | <b>30</b> | <b>20</b> |
| EA1                           | 1 (25%)   | 10 (33%)  | 9 (45%)   |
| EA2                           | 3 (75%)   | 16 (53%)  | 8 (40%)   |
| EA3                           | 0         | 1 (3%)    | 1 (5%)    |
| non-H58                       | 0         | 3 (10%)   | 2 (10%)   |
| Shannon diversity             | 0.56      | 1.05      | 1.11      |

# ***Spatiotemporal distribution of S. Typhi cases and carriers***

We examined the spatial and temporal distribution of all *S. Typhi* isolates collected at the study clinics (see **methods; Fig. S1 and Table S7**), and the subset of 96 *S. Typhi* from cases and 67 from carriers living within the demographic surveillance site (DSS) (**Fig. 3 and Table 4**). A number of peaks in monthly *S. Typhi* case and carrier numbers are apparent in both cohorts (**Fig. 3 and Fig. S1**), with fewer cases and carriers observed in warmer months. Carrier counts remained relatively consistent throughout the study period. We tested for association between case or carrier peaks (>2 positives per month) and high rainfall or temperature in the same month, previous month, or two months prior to the month of observation (**Table 4, and Table S7**). For those *S. Typhi* from within the DSS, high temperatures were associated with lower case and carrier counts in the same month, and in the subsequent month ( $p<0.05$ , using Fisher's exact test), however no associations between high rainfall and elevated case or carrier counts was observed.

GPS coordinates were available for  $n=139$  (55%) *S. Typhi* isolates, and we endeavoured to look for geographic hotspots suggestive of major point-source single-genotype outbreaks in the informal settlement. However, our data revealed that the three H58 genotypes and non-H58 genotypes were co-circulating throughout the study area, with no evidence of geographic restriction of specific genotypes (see **Fig. S2**). Further, we did not observe any spatially linked phylogenetic clusters of closely related sequences.

**Table 4. Climatic predictors of elevated case and control counts inside the DSS**

| <b>Typhoid Cases</b>                       |                    |                |                       |                |                       |                |
|--------------------------------------------|--------------------|----------------|-----------------------|----------------|-----------------------|----------------|
| <b>Month</b>                               | <b>Same month</b>  |                | <b>Previous month</b> |                | <b>2 months prior</b> |                |
|                                            | <b>OR (95% CI)</b> | <b>p-value</b> | <b>OR (95% CI)</b>    | <b>p-value</b> | <b>OR (95% CI)</b>    | <b>p-value</b> |
| <b>Rainfall (precipitation) &gt; 75 mm</b> | 0.21 (0.019-1.2)   | 0.079          | 1.4 (0.26-6.9)        | 0.73           | 3.7 (0.73-22.3)       | 0.08           |
| <b>Minimum temperature &gt;14°C</b>        | 0.21 (0.041-0.95)  | 0.025*         | 0.61 (0.14-2.6)       | 0.52           | 2.2 (0.49-10.5)       | 0.33           |
| <b>Maximum temperature &gt;26°C</b>        | 0.85 (0.20-3.6)    | 1              | 0.37 (0.080-1.6)      | 0.20           | 0.67 (0.15-2.80)      | 0.75           |
| <b>Asymptomatic Controls</b>               |                    |                |                       |                |                       |                |
| <b>Month</b>                               | <b>Same month</b>  |                | <b>Previous month</b> |                | <b>2 months prior</b> |                |
|                                            | <b>OR (95% CI)</b> | <b>p-value</b> | <b>OR (95% CI)</b>    | <b>p-value</b> | <b>OR (95% CI)</b>    | <b>p-value</b> |
| <b>Rainfall (precipitation) &gt; 75 mm</b> | 1.2 (0.21-6.5)     | 1              | 0.43 (0.038-2.7)      | 0.45           | 0.43 (0.038-2.7)      | 0.45           |
| <b>Minimum temperature &gt;14°C</b>        | 0.12 (0.016-0.64)  | 0.005*         | 0.41 (0.078-1.9)      | 0.30           | 0.65 (0.13-3.2)       | 0.73           |
| <b>Maximum temperature &gt;26°C</b>        | 0.10 (0.0090-0.61) | 0.005*         | 0.19 (0.027-1.0)      | 0.04*          | 0.63 (0.12-3.0)       | 0.73           |

Values in cells are odds ratios and p-values for Fisher's exact test between high case or control count (>2 per month) and high rainfall/temperature. \* highlights p-values <0.05.

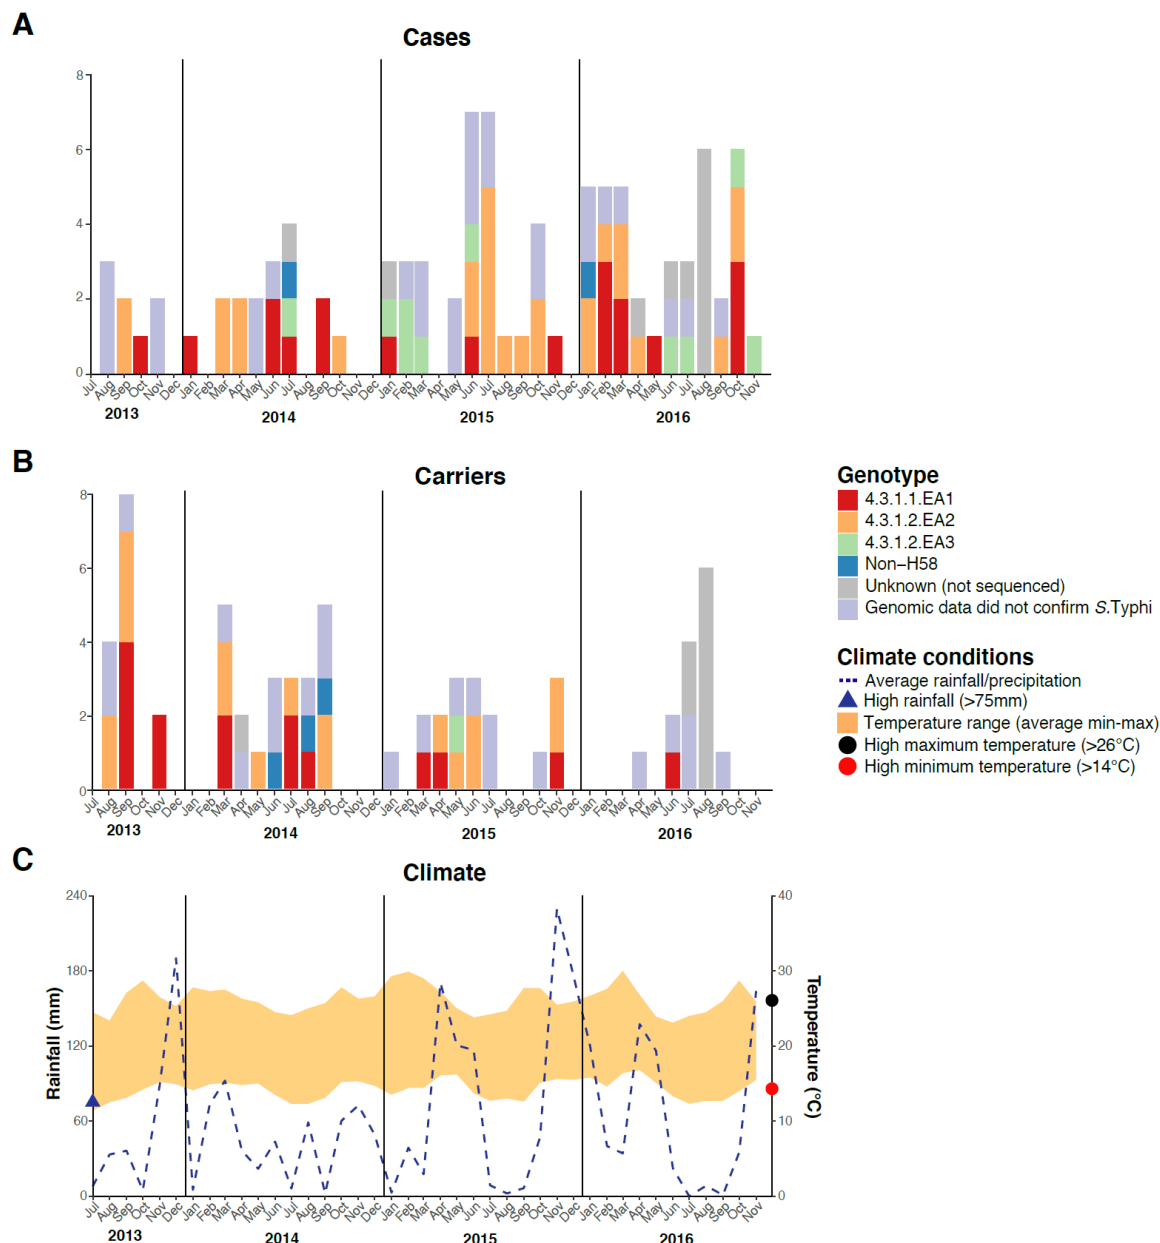

**Figure 3. Epidemic curve of all *S. Typhi* cases and controls per month inside the DSS.** (A) Monthly distribution of *S. Typhi* genotypes from cases. (B) Monthly distribution of *S. Typhi* genotypes from carriers. Note that the counts include all participants who were culture-positive for *S. Typhi* and also those who were culture-positive for other *Salmonella* but identified later by WGS as *S. Typhi*. (C) Weather conditions throughout the study period. Blue dashed line indicates precipitation level per month (rainfall), shaded orange polygon indicates the temperature range, red circle indicates threshold for high minimum temperature for statistical testing, black circle indicates threshold for high maximum temperature for statistical testing, blue triangle indicates threshold for high rainfall for statistical testing.

## **Evolutionary history of *S. Typhi* cases and controls**

We applied Bayesian phylodynamic analysis to all available Kenyan H58 genomes to estimate the dates of emergence of each of the East African lineages. The data showed temporal structure (see **methods** and **Fig. S3**), and we estimated a genome-wide substitution rate of 0.8 SNPs per genome per year (95% HPD, 0.1-1.0). This translates to a rate of  $1.9 \times 10^{-7}$  genome-wide substitutions per site per year (95% HPD =  $1.5 \times 10^{-7}$ - $2.2 \times 10^{-7}$ ). The novel EA1 isolates from this study (accounting for 35% of cases and 37% of controls) were intermingled with those sequenced previously from Kenya and were genetically diverse (median pairwise distance ~16 SNPs, interquartile range 12-27). This is indicative of a well-established EA1 *S. Typhi* population in Nairobi for which we estimate the mrca existed circa 1990 (95% HPD, 1981-1999) (see **Fig. 4a**). The most common lineage was EA2 (48%), which also showed extensive diversity and we estimate emerged circa 1988-1990 (95% HPD, 1978-1997) (see **Fig. 4a**), earlier than the first recorded H58 Lineage II isolation in Kenya in 2004<sup>14</sup>. We estimate the MDR fluoroquinolone non-susceptible lineage EA3, which accounts for just 11% of isolates, arrived much more recently (Kenyan mrca circa 2012, 95% HPD 2009-2014) (see **Fig. 4a**). The topology of the global H58 tree (**Fig. 2**) supports South Asia as the most likely origin for EA3, with EA3 strains spreading between Kenya and Uganda, probably through the shared transport systems.

The Bayesian tree of Kenyan H58 isolates (**Fig. 4a**) shows intermingling of sequences from acute cases and asymptomatic carriers. Sequences from carriers appeared more deeply branched than those of cases (**Fig. 4a**), which we tested by comparing the

terminal branch lengths (estimated in units of time in the Bayesian phylogeny) and isolate-specific SNP counts, for high-quality H58 sequences from acute cases (n=85) vs those of asymptomatic carriers (n=43) (**Fig. 4b**). The mean values were higher for carriers vs cases (**Fig. 4b-c**), with the trend being more pronounced among samples from within the DSS (see **Fig. S4**), but these trends were not statistically significant (p=0.42 for unique SNPs and p=0.57 for terminal branches for all samples, using one-sided Wilcoxon rank sum test; p=0.051 for unique SNPs and p=0.58 for terminal branches in DSS). The mean number of non-synonymous (NS) mutations detected in terminal branches was greater for carrier isolates than those from cases, but again this difference was not statistically significant (0.72 vs 0.54 for all sequences, p=0.53 using Wilcox rank sum test; 0.81 vs. 0.39, p=0.20 inside the DSS; see **Fig. 4d** and **Fig. S4**). There was also no significant difference in terminal branch lengths or unique SNP counts between genomes carrying vs lacking MDR genes or QRDR mutations (data not shown).

Examination of the location of terminal-branch NS mutations revealed that certain functional categories of genes carried more NS mutations arising on terminal branches associated with carriage samples vs those from acute cases (**Fig. 5, Fig. S5, and Table S8**). Notably, carriage samples were associated with significantly higher frequencies of terminal-branch NS mutations in genes responsible for the synthesis of surface polysaccharides and antigens (9.3% of carriers vs 1.2% of acute cases, p=0.043, Fisher's exact test). Notably, in the *viaB* operon (responsible for Vi capsule biosynthesis) we identified n=2/43 carriage isolates that harboured NS mutations (*tviD*-



R159C and *tviE*-P263S) compared with only n=1/85 case isolate (*tviB*-V1M); and in the *wba* cluster genes (responsible for O-antigen biosynthesis) we identified n=2/43 carriage isolates that harboured NS mutations (*wza*-V137G and *wzc*-L26F) whilst none were detected among case samples (**Table S8**). Non-significant excesses of mutations in carriage isolates were also observed for pathogenicity-island related functions and for periplasmic and exported lipoproteins (**Fig 5**).

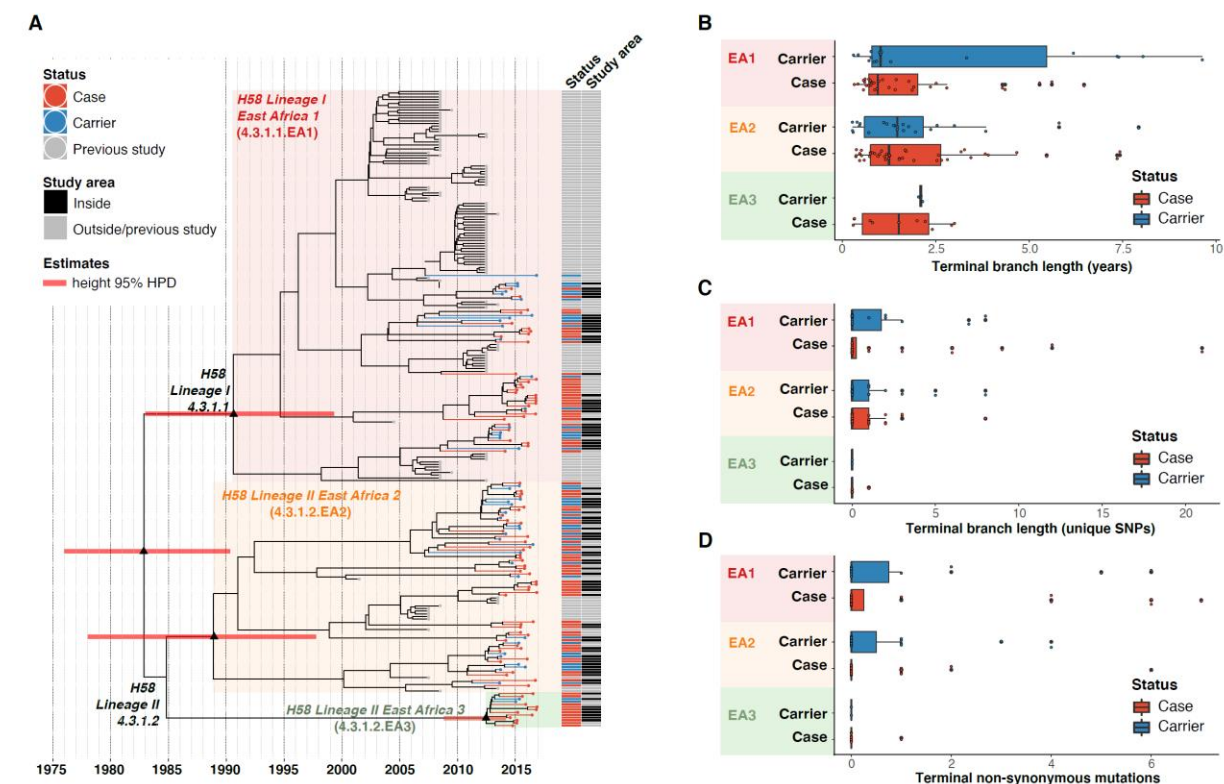

**Fig. 4. Temporal distribution of genotypes and among cases and carriers.** (A) Dated maximum-clade credibility phylogenetic tree of Kenyan *S. Typhi* genotype 4.3.1 (H58), including 128 isolated from this study. Tip colours & first colour bar indicate symptom status, second colour bar indicates those isolates from children living in the defined survey area. Black triangles demarcate nodes of interest, and the accompanying bars indicate 95% HPD of node heights. Interactive phylogeny available at <https://microreact.org/project/I2KUoasUB>. (B) Distribution of terminal branch lengths for all sequences, extracted from the Bayesian tree shown in (A). (C) Distribution of isolate-specific SNPs detected in sequences from all cases and controls. (D) Distribution of terminal non-synonymous mutations detected in sequences from all

cases and controls. In the boxplots in panels B, C, and D, black bars indicate median values, boxes indicate interquartile range. Cases and carrier samples indicated as per the inset legend.

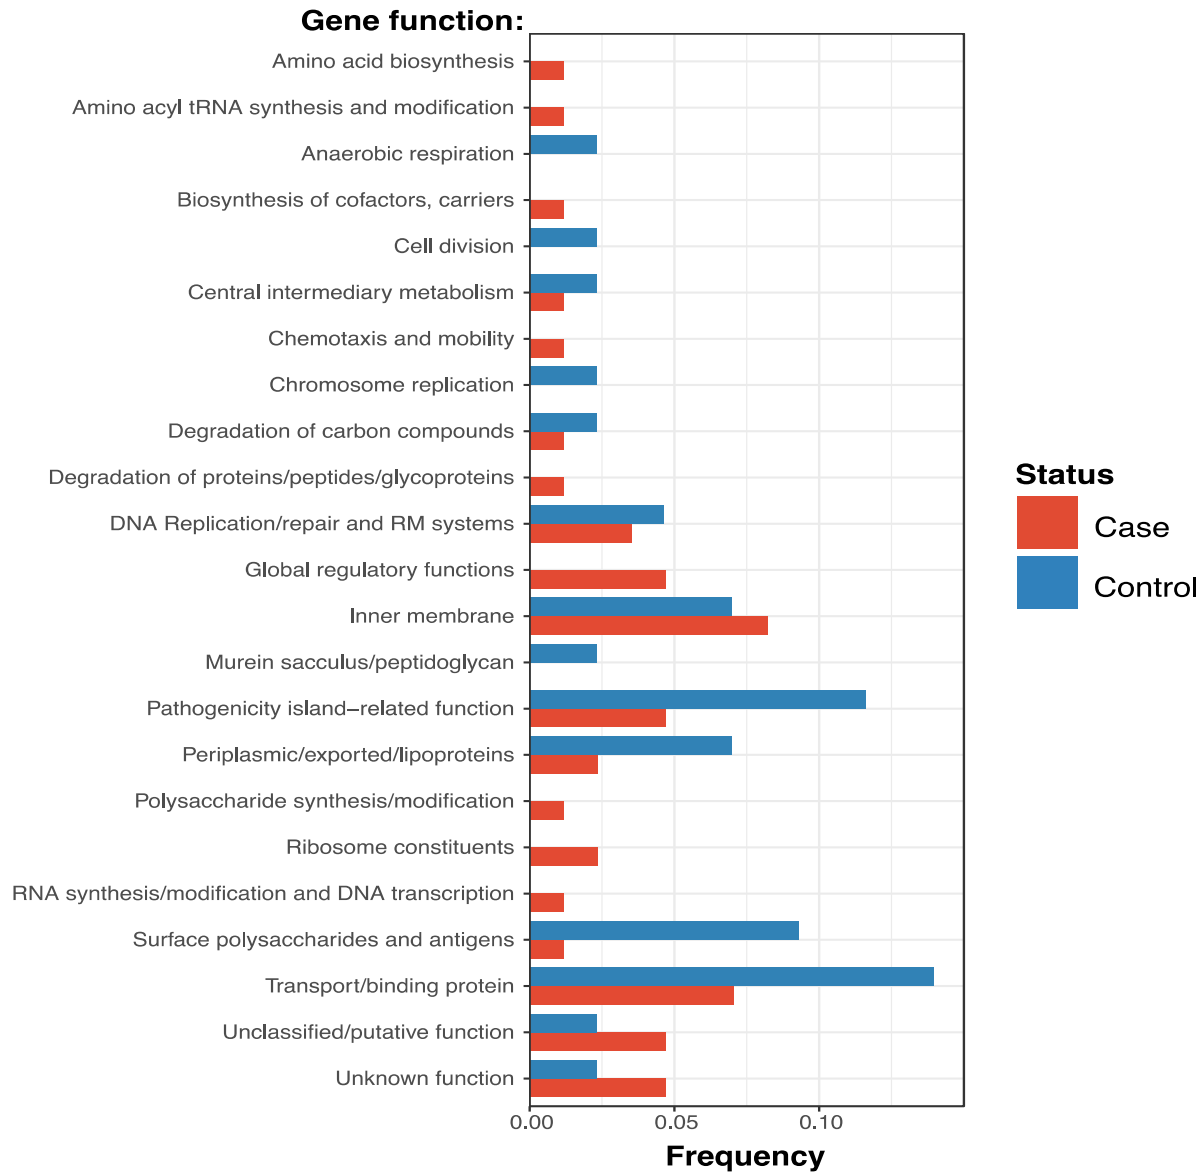

**Fig. 5. Frequency of terminal non-synonymous mutations in difference gene functional categories among cases and carriers.** Frequency of terminal non-synonymous mutations in all sequences. Red bars indicate the frequency non-synonymous mutations found in acute case samples, and blue bars indicate the frequency of mutations found in carrier samples.

## Discussion

In this case-control typhoid surveillance study, we observed an asymptomatic *S. Typhi* carriage rate of 1.1% among children aged 16 years and under from an informal settlement with endemic Water, Sanitation, and Hygiene (WaSH) related enteric diseases<sup>25,30,51</sup>. To our knowledge, there has not been systematic surveillance for typhoid carriage in communities in Africa, but globally carriage and shedding of *S. Typhi* has mostly been associated with older age groups<sup>6,52,53</sup>. Our data highlights a role for paediatric carriage, revealing a lower percentage of carriers amongst infants  $\leq 1$  year of age (0.62%), increasing to 1.2% in children between 7 and 16 years (**Table S4**). Thus, carriage and shedding, especially among school age children, is likely an important factor in the onward transmission of typhoid in this setting<sup>25</sup>. Symptomatic typhoid fever is common in school age children, with a case culture positive rate of 4.3% among febrile children 7 to 16 years of age, though our data shows that there is also a substantial burden among younger children 1 to 7 years of age, and infants up to 1 year of age, with culture positive rates among febrile participants of 3.1% and 2.2%, respectively (**Table S4**).

We previously noted a dominance of MDR H58 *S. Typhi* over the last decade, essentially replacing the antimicrobial susceptible genotypes that dominated in the 1980-1990s<sup>54</sup>. The *S. Typhi* circulating in the informal settlement in the present study are largely comprised of descendants of the previously observed H58 sublineages 4.3.1.EA1 (36%) and 4.3.1.2.EA2 (48%)<sup>12,15</sup>. Both EA1 and EA2 appear to be long established genotypes, with the mrca of EA1 existing circa 1990 (95% HPD, 1981-1999)

(see **Fig. 4a**), consistent with the earliest recorded detection of H58 Lineage I in Kenya in 1988<sup>14</sup>. Similarly we predict that the mrca of EA2 existed circa 1988-1990 (95% HPD, 1978-1997) (see **Fig. 4a**), earlier than the first recorded H58 Lineage II isolation in Kenya in 2004<sup>14</sup>. Our data thus support contemporaneous imports of EA1 and EA2 in the late 1980s or early 1990s, shortly after the emergence of H58 in South Asia<sup>12</sup> (circa 1982, 95% HPD 1974-1990), and show that both lineages have persisted and diversified locally alongside one another in the intervening decades. H58 sublineage EA3 was introduced later (we estimate that the Kenyan mrca existed circa ~2012 (95% HPD 2009 to 2014)), and consistent with this the lineage displays less diversity and accounts for a smaller fraction of cases and controls (11%). The topology of our global phylogeny (**Fig. 2**) suggests that South Asia is the most likely origin of EA3 (as it is for EA1 and EA2), and that EA3 appears to have spread between Uganda and Kenya. This in line with multiple reports<sup>13,15</sup> of H58 strains spreading through East Africa, mainly arising from intracontinental and transcontinental travel and concomitant risk factors associated with WASH conditions.

The sublineages of *S. Typhi* H58 in Kenya exhibit different antibiotic resistance profiles (**Fig. 2, Table 2**). Notably, EA1 has a large Kenyan sublineage of MDR strains with IncHI1 plasmids<sup>12,15</sup> (which are commonly associated with outbreaks in East Africa and Asia<sup>12,15,50</sup>) but also a Kenyan sublineage with chromosomally integrated MDR. Chromosomal integration of MDR has not previously been reported in *S. Typhi* from Kenya (see **supplementary data**), but has been reported in Malawi and Tanzania<sup>12,1</sup> and our new data suggests that the variant may have been transferred to these

locations from Kenya (see **Figure 2**). MDR H58 isolates are now widespread across East Africa, having been detected in Malawi, Uganda, Rwanda, Tanzania and Mozambique<sup>12,13,15,33,55</sup>.

The three East African lineages differed markedly in their patterns of mutations conferring Decreased Ciprofloxacin Susceptibility (DCS). GyrB-S464F was conserved among all EA2, whereas all EA3 isolates carried the GyrA-S83Y mutation. The GyrA-S464F mutation was also detected at low frequency in EA1 (**Table 2**). This data indicates that ciprofloxacin resistance has been selected independently multiple times and is ongoing. Increasing rates of ciprofloxacin resistance have also been observed following similar introductions of H58 elsewhere in East Africa<sup>15</sup>, and likely reflect a change in treatment practise following widespread dissemination of MDR *S. Typhi* elsewhere including South and Southeast Asia<sup>34,56,57</sup>.

The different *S. Typhi* lineages appeared to be fairly evenly distributed between both acute cases and carriers, with the most common subgroup (EA2) accounting for 46% of acute cases and 50% of carriers. Similarly, all *S. Typhi* genotypes were identified throughout the study period and spatially across the study site, with most case/carrier monthly counts and geographic regions containing a diversity of genotypes (**Fig. 3 and Fig. S2**). Our data therefore provides no evidence for major point-source single-genotype outbreaks, but is consistent with persistent contamination of water supplies with multiple *S. Typhi* genotypes. Higher temperatures were associated with lower *S. Typhi* case and carrier counts, however, no association with high rainfall was observed.

These findings are in line with previous studies focusing on seasonal trends in nearby Kibera<sup>23</sup>. However they contrast with trends previously observed in other settings including Malawi, where higher temperatures and rainfall were associated with increased risk of disease albeit with a time lag of multiple months<sup>58</sup>, and South Asia<sup>59-61</sup>.

In our phylogenetic trees, branch lengths and SNP counts are measures of evolutionary time, and their terminal or isolate-specific quantities represent an upper bound on the time since acquisition of the infection from which each isolate was sampled. Hence, our data suggest that the *S. Typhi* isolated from asymptomatic controls may have had, on average, a longer duration from acquisition of the infection to sampling in the clinic. This supports the interpretation that *S. Typhi*-positive controls identified in this study represent genuine medium- to long-term typhoid carriers, rather than simply reflecting transient presence in the gut. The greater diversity observed here amongst controls (**Table 2**) further supports this interpretation. Longer branch lengths among carrier samples were also observed in a recent study<sup>8</sup> of *S. Typhi* isolated from bile samples from the gallbladders of cholecystectomy patients in Nepal. The differences in terminal branch lengths were non-significant in our study, possibly reflecting low statistical power or, perhaps less likely, that our control data constitute a mix of multiple carriage types including convalescent (three weeks to three months), temporary (three to twelve months), and chronic (more than one year) carriers. Also in line with previous findings<sup>8</sup>, our analyses provide evidence of positive selection among carriage isolates, with a higher proportion of non-synonymous mutations detected among carriers in specific

biological pathways including surface polysaccharides and antigens, transport/binding proteins, pathogenicity, and anaerobic respiration (**Fig. 5, Fig S5, Table S8**). This is exemplified in the genes encoding surface antigens, notably those responsible for biosynthesis of Vi capsule and O-antigen lipopolysaccharide.

Our study is not without limitations, firstly, our data are from a single informal settlement community in Nairobi, and thus may not be representative of the overall population structure and AMR patterns of typhoid in Kenya more broadly, or in older age groups. Similarly, our sample size yielded a relatively small number of isolates for WGS, and we thus lack statistical power for some genetic analyses.

## Conclusion

Our study is the first case-control study to identify and sequence both typhoid carriers and cases contemporaneously in an endemic community setting. High rates of AMR among both infection types in Kenya combined with high carriage and case rates, especially in the younger age groups, highlight the need for enhanced AMR and genomic surveillance in this region to inform both treatment guidelines and control strategies that keep pace with the local evolution and spread of AMR. Intervention strategies are urgently needed including the introduction of the new Vi conjugate vaccine in a programme that includes targeting of paediatric age groups in the short term, and improvements to WaSH infrastructure in the long term.



## **Funding**

Research reported in this publication was supported by the National Institute of Allergy and Infectious Diseases of the National Institutes of Health under Award Number R01AI099525 to S.K. and the Wellcome Trust. ZAD was supported by a grant funded by the Wellcome Trust (STRATAA; 106158/Z/14/Z and TyVac), and received funding from the European Union's Horizon 2020 research and innovation programme under the Marie Skłodowska-Curie grant agreement TyphiNET No 845681. GD was supported by the Cambridge Biomedical Research Council NIHR AMR theme. KEH was supported by a Senior Medical Research Fellowship from the Viertel Foundation of Australia, and the Bill and Melinda Gates Foundation, Seattle (grant #OPP1175797).

## **Author contributions**

SK, GD, JC and MA designed the project. ZAD, SD, KEH performed bioinformatic analysis of the *S. Typhi* genomes. CM, SA, NG and BO performed field work and patient recruitment and sampling, RN, CW, SRO and SMK performed laboratory sample processing and microbiological data analysis. SK, ZAD, KEH and GD wrote the manuscript. All authors contributed to the manuscript editing.

## **Competing interests**

The authors declare no competing interests.

## **Additional information**

Correspondence and requests for materials should be addressed to SK.



# References

- 1 Crump JA, Mintz ED. Global trends in typhoid and paratyphoid Fever. *Clin Infect Dis* 2010; **50**: 241–6.
- 2 Mogasale V, Maskery B, Ochiai RL, *et al.* Burden of typhoid fever in low-income and middle-income countries: a systematic, literature-based update with risk-factor adjustment. *Lancet Glob Health* 2014; **2**: e570–80.
- 3 Hopewell MR, Graham JP. Trends in access to water supply and sanitation in 31 major sub-Saharan African cities: an analysis of DHS data from 2000 to 2012. *BMC Public Health* 2014; **14**: 208–12.
- 4 Marchello CS, Hong CY, Crump JA. Global Typhoid Fever Incidence: A Systematic Review and Meta-analysis. *Clin Infect Dis* 2019; **68**: S105–16.
- 5 Marchello CS, Birkhold M, Crump JA. Complications and mortality of typhoid fever: A global systematic review and meta-analysis. *J Infect* 2020; **81**: 902–10.
- 6 Levine MM, Black RE, Lanata C. Precise estimation of the numbers of chronic carriers of *Salmonella typhi* in Santiago, Chile, an endemic area. *J Infect Dis* 1982; **146**: 724–6.
- 7 Parry CM, Hien TT, Dougan G, White NJ, Farrar JJ. Typhoid fever. *N Engl J Med* 2002; **347**: 1770–82.
- 8 Thanh DP, Thieu NTV, Nguyen Thi Nguyen T, *et al.* Gallbladder carriage generates genetic variation and genome degradation in *Salmonella Typhi*. *PLoS Pathog* 2020; **16**: e1008998.
- 9 Gauld JS, Hu H, Klein DJ, Levine MM. Typhoid fever in Santiago, Chile: Insights from a mathematical model utilizing venerable archived data from a successful disease control program. *PLoS Negl Trop Dis* 2018; **12**: e0006759.
- 10 Pitzer VE, Feasey NA, Msefula C, *et al.* Mathematical Modeling to Assess the Drivers of the Recent Emergence of Typhoid Fever in Blantyre, Malawi. *Clin Infect Dis* 2015; **61 Suppl 4**: S251–8.
- 11 Saad NJ, Bowles CC, Grenfell BT, *et al.* The impact of migration and antimicrobial resistance on the transmission dynamics of typhoid fever in Kathmandu, Nepal: A mathematical modelling study. *PLoS Negl Trop Dis* 2017; **11**: e0005547.
- 12 Wong VK, Baker S, Pickard DJ, *et al.* Phylogeographical analysis of the dominant multidrug-resistant H58 clade of *Salmonella Typhi* identifies inter- and intracontinental transmission events. *Nat Genet* 2015; **47**: 632–9.

- 683 13 Feasey NA, Gaskell K, Wong V, *et al.* Rapid emergence of multidrug resistant,  
684 H58-lineage *Salmonella typhi* in Blantyre, Malawi. *PLoS Negl Trop Dis* 2015; **9**:  
685 e0003748.
- 686 14 Kariuki S, Revathi G, Kiiru J, *et al.* Typhoid in Kenya is associated with a dominant  
687 multidrug-resistant *Salmonella enterica* serovar Typhi haplotype that is also  
688 widespread in Southeast Asia. *J Clin Microbiol* 2010; **48**: 2171–6.
- 689 15 Park SE, Pham DT, Boinett C, *et al.* The phylogeography and incidence of multi-  
690 drug resistant typhoid fever in sub-Saharan Africa. *Nat Commun* 2018; **9**: 5094.
- 691 16 Klemm EJ, Shakoore S, Page AJ, *et al.* Emergence of an Extensively Drug-  
692 Resistant *Salmonella enterica* Serovar Typhi Clone Harboring a Promiscuous  
693 Plasmid Encoding Resistance to Fluoroquinolones and Third-Generation  
694 Cephalosporins. *mBio* 2018; **9**: 346–344.
- 695 17 Hendriksen RS, Leekitcharoenphon P, Mikoleit M, *et al.* Genomic dissection of  
696 travel-associated extended-spectrum-beta-lactamase-producing *Salmonella*  
697 *enterica* serovar typhi isolates originating from the Philippines: a one-off occurrence  
698 or a threat to effective treatment of typhoid fever? *J Clin Microbiol* 2015; **53**: 677–  
699 80.
- 700 18 Lutterloh E, Likaka A, Sejvar J, *et al.* Multidrug-resistant typhoid fever with  
701 neurologic findings on the Malawi-Mozambique border. *Clin Infect Dis* 2012; **54**:  
702 1100–6.
- 703 19 Marks F, Kalckreuth von V, Aaby P, *et al.* Incidence of invasive salmonella disease  
704 in sub-Saharan Africa: a multicentre population-based surveillance study. *Lancet*  
705 *Glob Health* 2017; **5**: e310–23.
- 706 20 Neil KP, Sodha SV, Lukwago L, *et al.* A large outbreak of typhoid fever associated  
707 with a high rate of intestinal perforation in Kasese District, Uganda, 2008-2009. *Clin*  
708 *Infect Dis* 2012; **54**: 1091–9.
- 709 21 Kyobutungi C, Ziraba AK, Ezech A, Yé Y. The burden of disease profile of residents  
710 of Nairobi's slums: results from a demographic surveillance system. *Popul Health*  
711 *Metr* 2008; **6**: 1.
- 712 22 Mberu BU, Haregu TN, Kyobutungi C, Ezech AC. Health and health-related  
713 indicators in slum, rural, and urban communities: a comparative analysis. *Glob*  
714 *Health Action* 2016; **9**: 33163.
- 715 23 Breiman RF, Cosmas L, Njuguna H, *et al.* Population-based incidence of typhoid  
716 fever in an urban informal settlement and a rural area in Kenya: implications for  
717 typhoid vaccine use in Africa. *PLoS ONE* 2012; **7**: e29119.

- 718 24 Mutai WC, Muigai AWT, Waiyaki P, Kariuki S. Multi-drug resistant *Salmonella*  
719 enterica serovar Typhi isolates with reduced susceptibility to ciprofloxacin in Kenya.  
720 *BMC Microbiol* 2018; **18**: 187–5.
- 721 25 Mbae C, Mwangi M, Gitau N, *et al.* Factors associated with occurrence of  
722 salmonellosis among children living in Mukuru slum, an urban informal settlement  
723 in Kenya. *BMC Infect Dis* 2020; **20**: 422.
- 724 26 KNBS KNBOS. Kenya population and housing census 2009. 2009.
- 725 27 Olack B, Burke H, Cosmas L, *et al.* Nutritional status of under-five children living in  
726 an informal urban settlement in Nairobi, Kenya. *J Health Popul Nutr* 2011; **29**: 357–  
727 63.
- 728 28 Mutisya E, Yarime M. Understanding the Grassroots Dynamics of Slums in Nairobi:  
729 The Dilemma of Kibera Informal Settlements. *Int Trans J Eng Manag Appl Sci*  
730 *Technol* 2011; **2**: 1–18.
- 731 29 Tinline RR, Gregory D. The Universal Transverse Mercator Code: A location code  
732 for disease reporting. *Can Vet J* 1988; **29**: 825–9.
- 733 30 Kariuki S, Mbae C, Van Puyvelde S, *et al.* High relatedness of invasive multi-drug  
734 resistant non-typhoidal *Salmonella* genotypes among patients and asymptomatic  
735 carriers in endemic informal settlements in Kenya. *PLoS Negl Trop Dis* 2020; **14**:  
736 e0008440.
- 737 31 Patel JB, Cockerill FR, Bradford PA. Performance standards for antimicrobial  
738 susceptibility testing: twenty-fifth informational supplement. 2015.
- 739 32 Parkhill J, Dougan G, James KD, *et al.* Complete genome sequence of a multiple  
740 drug resistant *Salmonella enterica* serovar Typhi CT18. *Nature* 2001; **413**: 848–52.
- 741 33 Wong VK, Baker S, Connor TR, *et al.* An extended genotyping framework for  
742 *Salmonella enterica* serovar Typhi, the cause of human typhoid. *Nat Commun*  
743 2016; **7**: 12827.
- 744 34 Britto CD, Dyson ZA, Duchene S, *et al.* Laboratory and molecular surveillance of  
745 paediatric typhoidal *Salmonella* in Nepal: Antimicrobial resistance and implications  
746 for vaccine policy. *PLoS Negl Trop Dis* 2018; **12**: e0006408.
- 747 35 Pham Thanh D, Karkey A, Dongol S, *et al.* A novel ciprofloxacin-resistant subclade  
748 of H58 *Salmonella* Typhi is associated with fluoroquinolone treatment failure. *Elife*  
749 2016; **5**: e14003.
- 750 36 Croucher NJ, Page AJ, Connor TR, *et al.* Rapid phylogenetic analysis of large  
751 samples of recombinant bacterial whole genome sequences using Gubbins.  
752 *Nucleic Acids Res* 2015; **43**: e15–5.

- 753 37 Stamatakis A. RAxML version 8: a tool for phylogenetic analysis and post-analysis  
754 of large phylogenies. *Bioinformatics* 2014; **30**: 1312–3.
- 755 38 Argimon S, Abudahab K, Goater RJE, *et al.* Microreact: visualizing and sharing  
756 data for genomic epidemiology and phylogeography. *Microb Genom* 2016; **2**:  
757 e000093.
- 758 39 Paradis E, Claude J, Strimmer K. APE: Analyses of Phylogenetics and Evolution in  
759 R language. *Bioinformatics* 2004; **20**: 289–90.
- 760 40 Yu G, Smith DK, Zhu H, Guan Y, Lam TT-Y. ggtree: an rpackage for visualization  
761 and annotation of phylogenetic trees with their covariates and other associated  
762 data. *Methods Ecol Evol* 2016; **8**: 28–36.
- 763 41 Edwards DJ, Duchêne S, Pope B, Holt KE. SNPPar: identifying convergent  
764 evolution and other homoplasies from microbial whole-genome alignments. *bioRxiv*  
765 DOI:10.1101/2020.07.08.194480.
- 766 42 Rambaut A, Lam TT, Max Carvalho L, Pybus OG. Exploring the temporal structure  
767 of heterochronous sequences using TempEst (formerly Path-O-Gen). *Virus Evol*  
768 2016; **2**: vew007.
- 769 43 Suchard MA, Lemey P, Baele G, Ayres DL, Drummond AJ, Rambaut A. Bayesian  
770 phylogenetic and phylodynamic data integration using BEAST 1.10. *Virus Evol*  
771 2018; **4**: vey016.
- 772 44 Inouye M, Dashnow H, Raven L-A, *et al.* SRST2: Rapid genomic surveillance for  
773 public health and hospital microbiology labs. *Genome Med* 2014; **6**: 90.
- 774 45 Carattoli A, Zankari E, García-Fernández A, *et al.* In silico detection and typing of  
775 plasmids using PlasmidFinder and plasmid multilocus sequence typing. *Antimicrob*  
776 *Agents Chemother* 2014; **58**: 3895–903.
- 777 46 Gupta SK, Padmanabhan BR, Diene SM, *et al.* ARG-ANNOT, a new bioinformatic  
778 tool to discover antibiotic resistance genes in bacterial genomes. *Antimicrob Agents*  
779 *Chemother* 2014; **58**: 212–20.
- 780 47 Wick RR, Judd LM, Gorrie CL, Holt KE. Unicycler: Resolving bacterial genome  
781 assemblies from short and long sequencing reads. *PLoS Comput Biol* 2017; **13**:  
782 e1005595.
- 783 48 Wick RR, Schultz MB, Zobel J, Holt KE. Bandage: interactive visualization of de  
784 novo genome assemblies. *Bioinformatics* 2015; **31**: 3350–2.
- 785 49 Hawkey J, Hamidian M, Wick RR, *et al.* ISMapper: identifying transposase insertion  
786 sites in bacterial genomes from short read sequence data. *BMC Genomics* 2015;  
787 **16**: 667–11.

- 788 50 Holt KE, Phan M-D, Baker S, *et al.* Emergence of a globally dominant IncHI1  
789 plasmid type associated with multiple drug resistant typhoid. *PLoS Negl Trop Dis*  
790 2011; **5**: e1245.
- 791 51 Kariuki S, Mbae C, Onsare R, *et al.* Multidrug-resistant Nontyphoidal Salmonella  
792 Hotspots as Targets for Vaccine Use in Management of Infections in Endemic  
793 Settings. *Clin Infect Dis* 2019; **68**: S10–5.
- 794 52 Senthilkumar B, Senbagam D, Rajasekarapandian M. An epidemiological  
795 surveillance of asymptomatic typhoid carriers associated in respect to  
796 socioeconomic status in India. *J Public Health* 2012; **22**: 297–301.
- 797 53 Gunn JS, Marshall JM, Baker S, Dongol S, Charles RC, Ryan ET. Salmonella  
798 chronic carriage: epidemiology, diagnosis, and gallbladder persistence. *Trends*  
799 *Microbiol* 2014; **22**: 648–55.
- 800 54 Kariuki S, Gordon MA, Feasey N, Parry CM. Antimicrobial resistance and  
801 management of invasive Salmonella disease. *Vaccine* 2015; **33 Suppl 3**: C21–9.
- 802 55 Ingle DJ, Nair S, Hartman H, *et al.* Informal genomic surveillance of regional  
803 distribution of Salmonella Typhi genotypes and antimicrobial resistance via  
804 returning travellers. *PLoS Negl Trop Dis* 2019; **13**: e0007620.
- 805 56 Britto CD, Dyson ZA, Mathias S, *et al.* Persistent circulation of a fluoroquinolone-  
806 resistant Salmonella enterica Typhi clone in the Indian subcontinent. *J Antimicrob*  
807 *Chemother* 2020; **75**: 337–41.
- 808 57 Rahman SIA, Dyson ZA, Klemm EJ, *et al.* Population structure and antimicrobial  
809 resistance patterns of Salmonella Typhi isolates in urban Dhaka, Bangladesh from  
810 2004 to 2016. *PLoS Negl Trop Dis* 2020; **14**: e0008036.
- 811 58 Thindwa D, Chipeta MG, Henrion MYR, Gordon MA. Distinct climate influences on  
812 the risk of typhoid compared to invasive non-typhoid Salmonella disease in  
813 Blantyre, Malawi. *Sci Rep* 2019; **9**: 20310–1.
- 814 59 Baker S, Holt KE, Clements ACA, *et al.* Combined high-resolution genotyping and  
815 geospatial analysis reveals modes of endemic urban typhoid fever transmission.  
816 *Open Biol* 2011; **1**: 110008.
- 817 60 Dewan AM, Corner R, Hashizume M, Ongee ET. Typhoid Fever and its association  
818 with environmental factors in the Dhaka Metropolitan Area of Bangladesh: a spatial  
819 and time-series approach. *PLoS Negl Trop Dis* 2013; **7**: e1998.
- 820 61 Kanungo S, Dutta S, Sur D. Epidemiology of typhoid and paratyphoid fever in India.  
821 *J Infect Dev Ctries* 2008; **2**: 454–60.

822

## **SUPPLEMENTARY MATERIAL**

### **Supplementary methods**

#### ***Phylogenetic and SNP analysis of S. Typhi isolates***

For SNP analysis, paired-end reads from 153 *S. Typhi* isolates were mapped to the reference sequence of *S. Typhi* CT18 (accession number: AL513382) <sup>1</sup> using the RedDog mapping pipeline (v1beta.10.3), available at <http://github.com/katholt/reddog>. Briefly, RedDog uses Bowtie (v2.2.3) <sup>2</sup> to map reads to the reference sequence; SAMtools (v0.1.19) <sup>3</sup> to identify SNPs with phred quality scores above 30; filter out SNPs supported by <5 reads, or with >2.5 times the genome-wide average read depth (representing putative repeated sequences), or with ambiguous (heterozygous) consensus base calls. For each SNP position that passed these criteria in any one isolate, consensus base calls (i.e. alleles) for that position were extracted from all genomes, and used to construct an alignment of alleles across all SNP sites. Ambiguous base calls and those with phred quality <20 were treated as unknown alleles and represented with a gap character in the SNP alignment. Read alignments were used to assign isolates to previously defined lineages according to the *S. Typhi* extended genotyping framework <sup>4-6</sup>, by subjecting the alignments (BAM format) to analysis with the GenoTyphi pipeline (available at <http://github.com/katholt/genotypphi>). Unique SNPs defining three novel lineages were identified from the genome-wide SNP allele table (with SNPs responsible for non-synonymous mutations in highly conserved genes without deletions prioritized for lineage definitions), these were added to the GenoTyphi scheme to facilitate easy identification of these lineages in future studies.



Phylogenetic analyses were restricted to WGS-confirmed pure cultures of *S. Typhi* H58 (genotype 4.3.1, n=128). For some analyses, an additional 1,076 *S. Typhi* H58 genomes from previously published WGS studies of global and African isolates<sup>4,7-9</sup> were also included for context (using the same mapping approach detailed above). Alleles from 61 additional *S. Typhi* genomes representing all non-H58 subclades (listed in **Table S2**), and *S. Paratyphi* A str. AKU\_12601 (accession FM200053)<sup>10</sup>, were also included in the phylogenetic analysis as outgroups for tree rooting. SNPs called in phage regions or repetitive sequences (354 kbp; ~7.4% of bases in the CT18 reference chromosome, as defined previously<sup>7,11,12</sup> were filtered from the alignment, which was then used with the CT18 reference genome (AL513382) to produce a whole genome pseudoalignment that was subjected to analysis with Gubbins (v2.3.2)<sup>13</sup> to remove any further recombinant regions. This resulted in a final set of 8,635 SNPs identified from an alignment of 4,275,037 sites for the 1,266 isolates.

From the global SNP alignment, maximum likelihood (ML) phylogenetic trees were inferred using RAxML (v8.2.9)<sup>14</sup>, with a generalized time-reversible model, a Gamma distribution to model site-specific rate variation (the GTR+  $\Gamma$  substitution model; GTRGAMMA in RAxML), and 100 bootstrap pseudo-replicates to assess branch support.

From the global alignment we extracted a separate SNP alignment for the set of 239 Kenyan *S. Typhi* H58 genomes (n=128 from this study and n=111 from published studies, see **Table S3**<sup>4,9</sup>, which had length 489 SNPs. The same phylogenetic

inference methods were used to generate a ML tree from the SNP alignment of 239 Kenyan isolates for temporal analyses (described below).

Phylogenetic trees were visualized using Microreact (interactive global H58 phylogeny available at: <https://microreact.org/project/wViqmaRdZuFVEb6yk4i1jU>)<sup>15</sup> and the R package *ggtree* v1.14.6<sup>16</sup>. For the purpose of plotting the global H58 tree, clusters of *S. Typhi* isolates that were members of the same monophyletic clade and isolated from the same location in South East Asian countries (i.e. representing local outbreaks) were reduced to a single representative each using the *drop.tip()* function in the R package *ape*<sup>17</sup>.

Terminal branch lengths were extracted from phylogenies using R package *ggtree*<sup>16</sup>. Pairwise SNP distances were calculated from alignments using the *dist.dna()* function in the R package *ape* v5.3<sup>17</sup>. Non-synonymous mutations were detected using SNPPar (V0.4.2dev)<sup>18</sup> and grouped by function based on the gene in which they were found according to the *S. Typhi* functional classification scheme developed at the Sanger Institute ([www.sanger.ac.uk](http://www.sanger.ac.uk)) using the genome annotation of CT18<sup>1,19</sup>.

### ***Phylogenetic analysis***

To investigate temporal signal and date the introduction of *S. Typhi* H58 into Kenya based on the 239 available genomes (n=128 from this study, and n=111 from previous studies<sup>4,9</sup>, we used several methods. First, we used TempEst (v1.5.1)<sup>20</sup> to assess temporal structure (i.e. clock-like evolution) by conducting a regression analysis of the



root-to-tip branch distances of the ML tree as a function of sampling date (expressed as decimal years at a resolution of days), using the heuristic residual mean squared method with the best fitting root selected. To estimate divergence dates for the three *S. Typhi* H58 sublineages we detected in Kenya (EA1-3), we used BEAST (v1.10)<sup>21</sup> to fit a phylodynamic model to the SNP alignment and isolation dates (as decimal years at a resolution of days). Note that as EA1-3 almost exclusively comprise Kenyan strains in the global H58 tree and the parent node for each of EA1-3 is the parent node for all Kenyan isolates of EA1-3 (see **Fig. 2**), the divergence dates for the EA1-3 parent nodes in the tree of 239 Kenyan isolates is taken as the divergence date for each of EA1-3 generally, as well as the lower bound for the date of introduction of each of these sublineages into Kenya.

We ran separate models using constant-coalescent population size and Bayesian skyline tree priors, in combination with a strict clock model or a relaxed (uncorrelated log normal distribution) clock model, to identify the best fitting model for our data. For BEAST analyses the GTR+ $\Gamma$  substitution model was selected, and sampling times (tip dates) were used to calibrate the molecular clock (for isolates collected in this study the precise day of isolation was used; for the previously published genomes, only the isolation year was known, so tip dates were assigned to the first of July for that year with an uncertainty of 0.5 years). For all tree prior and model combinations, a chain length of 100,000,000 steps with sampling every 5,000 steps was used<sup>22</sup>. The relaxed (uncorrelated lognormal) clock model, that allows for evolutionary rate variations among branches of the tree and the constant-coalescent model were found to best fit our data.

To assess the temporal signal of these Bayesian estimates, we conducted a date-randomisation test where sampling times were assigned randomly to the sequences, and the analysis re-run 20 times with the best fitting models (constant-coalescent demographic and uncorrelated lognormal clock)<sup>22,23</sup>. The date-randomisation test revealed that these data displayed ‘strong’ temporal structure (meeting the criterion CR2 of Duchene et al 2016). Our preliminary BEAST runs resulted in implausible tree topologies and dated the most recent common ancestor (mrca) of H58 *S. Typhi* in Kenya ~1927 (95% highest posterior density = 1847-1984), conflicting with previously inferred divergence dates for the emergence of H58 (5,7,26). Fixing the tree topology to that obtained from ML inference yielded more plausible date estimates (~1968, 95% HPD = 1957-1977), however, sampling from the prior (without the sequence alignment) using the same model showed that this estimate was driven entirely by the priors provided to the model, with no information contributed by the sequence data. Taken together, these preliminary analyses suggested that while a temporal signal is present in the alignment, the signal is weak and would benefit from the specification of sensible priors to calibrate the root height. Previous analyses of the H58 divergence date, inferred using global data spanning a wider sampling period and with stronger temporal signal, estimate it emerged circa 1989 (95% HPD, 1981-1995)<sup>7</sup>, and we have previously reported the presence of H58 lineage 1 in Kenya in the late 1980s<sup>24</sup>. We therefore specified a log-normally distributed root height prior with mean 1989 and standard deviation 4 years. Use of this root height prior (without fixing the tree topology) yielded a plausible tree topology (i.e. consistent with the outgroup-rooted maximum likelihood tree inferred from the same alignment, with the expected separation of H58

sublineages into monophyletic clades), showed evidence of temporal signal (via date randomisation testing), and was not driven by priors alone; hence this approach was used for the final analyses presented here.

For the final analyses, 2 independent runs each conducted with a chain length of 100,000,000 steps sampling every 5,000 iterations were combined using LogCombiner (v1.10.0)<sup>21</sup>, after removing the first 10% of steps from each as 'burn-in'. Maximum-clade credibility trees (MCC) trees were generated with 'common ancestor heights' specified for node heights, using TreeAnnotator (v1.10.0)<sup>21</sup>. The effective sample sizes (ESS) from the combined runs were >200 for all reported parameters. The resultant MCC tree was visualized using *ggtree* (v1.14.6)<sup>16</sup> and Microreact<sup>15</sup> (interactive phylogeny available at: <https://microreact.org/project/l2KUoasUB>).

### **Genomic determinants of antimicrobial resistance**

The read mapping-based allele typer SRST2 (v0.2.0)<sup>25</sup> was used to detect the presence of plasmid replicons (PlasmidFinder database<sup>26</sup>) and antimicrobial resistance (AMR genes) (ARGannot database<sup>27</sup>) and to identify the precise alleles of AMR genes. Where AMR genes were observed without evidence of a known AMR plasmid, raw read data was *de novo* assembled using Unicycler (v0.4.7)<sup>28</sup> and then examined visually using the Bandage (v0.8.1)<sup>29</sup> assembly graph visualizer, in order to interrogate the assembly to confirm the chromosomal location and composition of AMR-associated transposons. ISMapper (v2.0)<sup>30</sup> was used with default parameters to screen all read sets for insertion sites of transposases of IS1 (accession number J01730) relative to the

CT18 reference chromosome sequence, in order to identify the location of any such insertion sequences in the chromosome of each Kenyan *S. Typhi* genome. Single point mutations located within the quinolone resistance determining region (QRDR) of genes *gyrA*, *gyrB*, and *parC* associated with reduced susceptibility to fluoroquinolones<sup>8</sup> were detected from the whole genome read alignments (BAM files) described above, using GenoTyphi<sup>4-6</sup>. Where a resistance phenotype was detected in the absence of known molecular determinants of AMR, DBGWAS (v0.5.4)<sup>31 31</sup> was utilised to carry out a bacterial genome-wide association study (GWAS) to screen for genetic loci and/or variants associated with the observed resistance phenotype.

### **Statistical and spatial analysis**

All statistical analyses unless otherwise stated were carried out using R (v4.0.2). Multivariate logistic regression analyses were conducted with the *glm()* function in base R, and linear regression analyses of were carried out using the *lm()* function in base R. Shannon diversity was calculated using the *diversity()* function in the R package *vegan*<sup>32</sup>. Base R function *chisq.test()* was used to conduct a Chi-Squared test of age groups and *S. Typhi* genotypes. Fisher's exact test was carried out using the *fisher.test()* function in base R to investigate the frequency of non-synonymous mutations among cases and carriers, as well as associations between binary categories ('high' vs 'low') for monthly case counts or carrier counts and weather conditions (monthly rainfall, minimum and maximum temperature) in either the same month, the previous month, or two months prior. Thresholds for the 'high' categories were: case or carrier counts >2; rainfall >75 mm; minimum temperature >14°C; maximum temperature >26°C.

984

985   GPS coordinate data were visualized using Microreact<sup>15</sup>.

986

987

988

## **Supplementary results**

### ***Precision of AMR phenotypes from genotypes***

Observed AMR phenotypes for all high quality WGS data (n=128 H58 and n=8 Non-H58 genome sequences) were largely explained by the presence of known molecular determinants of AMR (**Table S5**). Sensitivity was generally high for previous first line drugs for treating typhoid including chloramphenicol, ampicillin, co-trimoxazole, as well as tetracyclines (>94%), as was specificity (>74%), and low very major errors (VME; failure to predict a resistance phenotype) were determined for these drugs (<4%). Major errors (ME; failure to predict a susceptible resistance phenotype) ranged between 5.1-7.4% for these drugs, and for three sequences, this is potentially explained by the loss of an IncHI1 plasmid (n=2) or Tn2670-like transposon (n=1) associated with the MDR phenotype in culture, as resistance phenotypes were not observed for any of these drugs.

VME for nalidixic acid (32.4%), and ME (23.5%) for ciprofloxacin were both high. The sensitivity and specificity for these drugs (**Table S5**) are confounded by the presence of the GyrB-S464F mutation (**Table 2**), conserved in all n=73 genome sequences of genotype 4.3.1.2.EA2 (H58 lineage 2 sublineage East Africa 2; discussed below in detail). The GyrB-S464F mutation has been previously reported to cause Decreased Ciprofloxacin Susceptibility (DCS), but not nalidixic acid resistance<sup>33</sup>, however, in our data the relationship between GyrB-S464F Quinolone/Fluoroquinolone resistance in this strain background remains unclear as 50.7% of EA2 isolates showed reduced susceptibility to nalidixic acid and 47.9% ciprofloxacin, with the rest testing sensitive to

these drugs. Neither comparative analysis of resistant and sensitive EA2 sequences, nor further bacterial GWAS analysis, revealed any evidence of either causal or compensatory mutations, or the acquisition/loss of genetic loci responsible for these phenotypes, perhaps due to low power.

Specificity estimates were high (100%), but sensitivity low (0%), for third generation cephalosporins including ceftazidime cefotaxime ceftriaxone and cefpodoxime (see **Table S5**). This was the result of phenotypic resistance to 3<sup>rd</sup> generation cephalosporins detected at low frequency among our high quality sequenced genomes (n=1-4, 0.73-2.9%) in the absence of any known molecular determinants for resistance to these drugs. A GWAS was again carried out using susceptibility data for these drugs, but no candidate molecular mechanisms significantly associated with the observed resistance phenotypes were identified, again possibly due to low power.

### **Local subpopulations of S. Typhi H58**

*Salmonella* Typhi H58 (genotype 4.3.1) is subdivided into lineages I (genotype 4.3.1.1) and II (genotype 4.3.1.2). Lineage II was more common in this setting than lineage I: n=90 (62.1% of H58) vs n=55 (37.9%). Examination of the global phylogeny (**Fig. 2**, and online interactive version <https://microreact.org/project/wVigmaRdZuFVEb6yk4i1jU>) revealed all H58 lineage I isolates from this study shared a most recent common ancestor (mrca) whose descendants form a monophyletic clade that exclusively comprised *S. Typhi* from East African countries (see **Fig. 2**). This clade corresponds to the previously reported introduction of H58 lineage I from South Asia into Eastern

1035 Africa, which appears to have arrived in Kenya before spreading to Tanzania and on to  
 1036 Malawi and South Africa <sup>4,34</sup> (**Fig. 2**). Here, we define this as H58 sublineage EA1 (East  
 1037 Africa 1) with genotype designation 4.3.1.1.EA1 (labelled in **Fig. 2**), which can be  
 1038 identified by the presence of a synonymous marker SNP STY0750-G1407A (position  
 1039 751854 in CT18; this genotype has been added to the GenoTyphi scheme available at  
 1040 <http://github.com/katholt/genotyphi>).  
 1041  
 1042 S. Typhi H58 lineage II (genotype 4.3.1.2) isolates from our study belonged to two  
 1043 distinct clades of the global phylogeny (**Fig. 2**), which were each exclusively populated  
 1044 by East African isolates. The largest of these clades (n=80 isolates, of which 81.3%  
 1045 derive from the current study) formed a monophyletic group in which isolates from this  
 1046 study were intermingled with those obtained from previous studies in Kenya (n=14,  
 1047 17.5%), and a single Tanzanian strain isolated in 2012 (see **Fig. 2**), suggestive of a  
 1048 single inter-country transmission event from Kenya into Tanzania. This clade is nested  
 1049 within a deeper clade of diverse South Asian isolates (see **Fig. 2**), and corresponds to  
 1050 the previously reported introduction of H58 lineage II into Kenya from South Asia <sup>7,9</sup>.  
 1051 This lineage, here defined as H58 sublineage EA2 (East Africa 2) and designated  
 1052 genotype 4.3.1.2.EA2 (labelled in **Fig. 2**), can be identified by the presence of a  
 1053 synonymous marker SNP STY4818-C1069T (position 4680610 in CT18). The smaller  
 1054 East African H58 lineage II clade (n=43 isolates) comprised two sister clades, separated  
 1055 by  $\geq 13$  SNPs, one involving isolates from Kenya (n=13, all from this study) and the other  
 1056 isolates from Uganda (n=30, which accounted for 100% of the typhoid burden at the  
 1057 Ugandan site in the TSAP study <sup>9</sup>) (see **Fig. 2**). This clade (including both the Ugandan



and Kenyan subgroups) is here defined as H58 sublineage EA3 (East Africa 3) and designated genotype 4.3.1.2.EA3 (labelled in **Fig. 2**), identified by synonymous marker SNP STY2750-G96A (position 2587488 in CT18). Both EA2 and EA3 genotypes have been added to the GenoTyphi scheme.

The three East African H58 subgroups circulating in our setting all had high rates of MDR (84%, 74% and 94%, respectively); however in EA2, MDR was exclusively associated with the PST6-IncHI1 plasmid, and in EA3 exclusively with the chromosomal insertion (see **Table 2** and **Fig. 2**). In EA1, most MDR was associated with the PST6-IncHI1 plasmid. However, a subclade of isolates (associated with spread to Tanzania and Malawi) carried the chromosomal insertion instead (see **Table 2** and **Fig. 2**). Chromosomal integration of MDR strains has not previously been reported in *S. Typhi* from Kenya, although it has been reported in the Malawi and Tanzanian sublineages of EA1<sup>7</sup> which our data suggests transferred to those locations from Kenya. Here, the integration of the MDR composite transposon into the chromosome of Kenyan EA1 and EA3 isolates was supported by both examination of genome assembly graphs and analysis of IS1 insertion sites (see **Methods**), both of which supported integration near gene *cyaA* as has been reported previously<sup>5,7</sup>. Interestingly, MDR in the Ugandan subclade of EA3 was associated with the IncHI1-PST6 plasmid, suggesting that migration of the transposon from plasmid to chromosome may have occurred *in situ* in Kenya after divergence from the Ugandan branch. The three East African lineages also differed markedly in their patterns of mutations associated with reduced susceptibility to fluoroquinolones: GyrB-S464F was conserved among all EA2, whereas all EA3 isolates

1081 carried the GyrA-S83Y mutation, and three distinct GyrA mutations, and the GyrA-  
1082 S464F mutation were detected at low frequency in EA1 (see **Table 2**).

1083

1084 **Supplementary Table 1 – Sequences used in this study (excel file)**



# **Supplementary Table 2 – Outgroup sequences used in this study (excel file)**

| <b>Lane_id</b> | <b>Accession_number</b> | <b>Genotype</b> | <b>Year</b> | <b>Country</b>   | <b>Publication</b> |
|----------------|-------------------------|-----------------|-------------|------------------|--------------------|
| 10593_2_44     | ERR360657               | 0.0.1           | 1998        | Cameroon         | Wong et al 2015    |
| 10562_2_20     | ERR357775               | 0.0.2           | 2011        | Indonesia        | Wong et al 2015    |
| 10349_1_89     | ERR343337               | 0.0.3           | 2002        | India            | Wong et al 2015    |
| 10592_2_36     | ERR360484               | 0.1.0           | 2009        | Algeria          | Wong et al 2015    |
| 10592_2_57     | ERR360505               | 0.1.1           | 2001        | Cameroon         | Wong et al 2015    |
| 10593_2_55     | ERR360668               | 0.1.2           | 1999        | Algeria          | Wong et al 2015    |
| 10592_2_38     | ERR360486               | 0.1.3           | 1998        | Peru             | Wong et al 2015    |
| 10593_2_14     | ERR360627               | 1.1.1           | 2005        | Algeria          | Wong et al 2015    |
| 10071_3_32     | ERR338008               | 1.1.2           | 2007        | South Africa     | Wong et al 2015    |
| 10592_2_63     | ERR360511               | 1.1.3           | 1976        | DRC              | Wong et al 2015    |
| 10493_1_28     | ERR352453               | 1.1.4           | 2011        | Unknown          | Wong et al 2015    |
| 10561_2_77     | ERR357652               | 1.2.1           | 1993        | Vietnam          | Wong et al 2015    |
| 10592_2_5      | ERR360453               | 2.0.0           | 2003        | Pakistan         | Wong et al 2015    |
| 10592_2_2      | ERR360450               | 2.0.1           | 2003        | Pakistan         | Wong et al 2015    |
| 10349_1_73     | ERR343321               | 2.0.2           | 2011        | Mexico           | Wong et al 2015    |
| 10541_2_8      | ERR357445               | 2.1.0           | 2011        | East Timor       | Wong et al 2015    |
| 10060_5_18     | ERR331221               | 2.1.1           | 2006        | Indonesia        | Wong et al 2015    |
| 10349_1_3      | ERR343251               | 2.1.2           | 2002        | Western Asia     | Wong et al 2015    |
| 10071_3_76     | ERR338052               | 2.1.3           | 2004        | Indonesia        | Wong et al 2015    |
| 10349_1_2      | ERR343250               | 2.1.4           | 2002        | Western Asia     | Wong et al 2015    |
| 10493_1_42     | ERR352467               | 2.1.5           | 2011        | Indonesia        | Wong et al 2015    |
| 10060_5_49     | ERR331252               | 2.1.6           | 2009        | Indonesia        | Wong et al 2015    |
| 10562_2_49     | ERR357804               | 2.1.7           | 1993        | Papua New Guinea | Wong et al 2015    |
| 9953_5_54      | ERR326650               | 2.1.8           | 2006        | Indonesia        | Wong et al 2015    |
| 9953_5_57      | ERR326653               | 2.1.9           | 2007        | Indonesia        | Wong et al 2015    |
| 10060_6_73     | ERR331370               | 2.2.0           | 2006        | Tanzania         | Wong et al 2015    |
| 10493_1_15     | ERR352440               | 2.2.1           | 2012        | India            | Wong et al 2015    |
| 10562_2_12     | ERR357767               | 2.2.2           | 2011        | India            | Wong et al 2015    |
| 10209_5_36     | ERR340792               | 2.2.3           | 2002        | Laos             | Wong et al 2015    |
| 9475_4_57      | ERR279353               | 2.2.4           | 2004        | India            | Wong et al 2015    |
| 10593_2_56     | ERR360669               | 2.3.1           | 2007        | Cameroon         | Wong et al 2015    |
| 10592_2_59     | ERR360507               | 2.3.2           | 1999        | Mali             | Wong et al 2015    |
| 10593_2_49     | ERR360662               | 2.3.3           | 2000        | Bangladesh       | Wong et al 2015    |
| 9953_5_69      | ERR326665               | 2.3.4           | 2010        | Laos             | Wong et al 2015    |
| 10493_1_70     | ERR352495               | 2.3.5           | 1983        | Fiji             | Wong et al 2015    |
| 10071_3_68     | ERR338044               | 2.4.0           | 2009        | South Africa     | Wong et al 2015    |
| 10071_3_40     | ERR338016               | 2.4.1           | 2006        | South Africa     | Wong et al 2015    |
| 10349_1_5      | ERR343253               | 2.5.0           | 2002        | India            | Wong et al 2015    |
| 10561_2_5      | ERR357580               | 2.5.1           | 2011        | DRC              | Wong et al 2015    |
| 10060_5_34     | ERR331237               | 3.0.0           | 2011        | Indonesia        | Wong et al 2015    |
| 10593_2_45     | ERR360658               | 3.0.1           | 2000        | Morocco          | Wong et al 2015    |
| 10541_2_6      | ERR357443               | 3.0.2           | 2012        | India            | Wong et al 2015    |
| 10593_2_18     | ERR360631               | 3.1.0           | 2002        | China            | Wong et al 2015    |
| 10593_2_58     | ERR360671               | 3.1.1           | 2004        | Benin            | Wong et al 2015    |
| 9953_5_15      | ERR326611               | 3.1.2           | 2010        | Indonesia        | Wong et al 2015    |
| 10060_6_66     | ERR331363               | 3.2.1           | 2010        | Laos             | Wong et al 2015    |
| 10592_2_25     | ERR360473               | 3.2.2           | 2003        | Pakistan         | Wong et al 2015    |
| 10592_2_17     | ERR360465               | 3.3.0           | 2003        | Pakistan         | Wong et al 2015    |
| 7468_7_78      | ERR108677               | 3.3.1           | 2009        | Tanzania         | Wong et al 2015    |
| 9953_5_93      | ERR326689               | 3.4.0           | 2008        | Laos             | Wong et al 2015    |
| 8490_6_44      | ERR213262               | 3.5.0           | 1996        | Fiji             | Wong et al 2015    |
| 10493_1_76     | ERR352501               | 3.5.1           | 1985        | Fiji             | Wong et al 2015    |
| 10060_6_15     | ERR331312               | 3.5.2           | 2010        | Laos             | Wong et al 2015    |
| 10492_1_5      | ERR352258               | 3.5.3           | 2010        | Samoa            | Wong et al 2015    |
| 10071_8_55     | ERR338124               | 3.5.4           | 2012        | Samoa            | Wong et al 2015    |
| 10071_8_60     | ERR338129               | 4.1.0           | 2012        | Samoa            | Wong et al 2015    |
| 9475_6_92      | ERR279189               | 4.1.1           | 2006        | Malawi           | Wong et al 2015    |
| 8490_6_49      | ERR213267               | 4.2.0           | 1996        | Fiji             | Wong et al 2015    |
| 8447_8_28      | ERR204271               | 4.2.1           | 2008        | Fiji             | Wong et al 2015    |

1148 8490\_5\_25 ERR213243 4.2.2 2011 Fiji Wong et al 2015  
 1149 8490\_6\_61 ERR213279 4.2.3 1994 Fiji Wong et al 2015  
 1150  
 1151  
 1152

**Supplementary Table 3 – Kenyan sequences used in temporal analyses (excel file)**

| <u>Lane.and.tree_ID</u> | <u>Accession_number</u> | <u>Genotype</u> | <u>Year</u> | <u>Date</u> | <u>Country</u> | <u>Publication</u> |  |
|-------------------------|-------------------------|-----------------|-------------|-------------|----------------|--------------------|--|
| 16404_4_5               | ERR984707               | 4.3.1.1         | 2012        | 01-07-12    | Kenya          | Park et al. 2018   |  |
| 16404_4_75              | ERR984776               | 4.3.1.1         | 2012        | 01-07-12    | Kenya          | Park et al. 2018   |  |
| 16404_5_36              | ERR984827               | 4.3.1.1         | 2012        | 01-07-12    | Kenya          | Park et al. 2018   |  |
| 16404_5_43              | ERR984834               | 4.3.1.1         | 2012        | 01-07-12    | Kenya          | Park et al. 2018   |  |
| 16404_5_67              | ERR984858               | 4.3.1.1         | 2012        | 01-07-12    | Kenya          | Park et al. 2018   |  |
| 16549_7_4               | ERR1010003              | 4.3.1.1         | 2012        | 01-07-12    | Kenya          | Park et al. 2018   |  |
| 16404_4_46              | ERR984748               | 4.3.1.1         | 2012        | 01-07-12    | Kenya          | Park et al. 2018   |  |
| 16404_4_59              | ERR984761               | 4.3.1.1         | 2012        | 01-07-12    | Kenya          | Park et al. 2018   |  |
| 16404_4_65              | ERR984767               | 4.3.1.1         | 2013        | 01-07-13    | Kenya          | Park et al. 2018   |  |
| 16404_4_66              | ERR984768               | 4.3.1.1         | 2012        | 01-07-12    | Kenya          | Park et al. 2018   |  |
| 16404_4_73              | ERR984774               | 4.3.1.1         | 2012        | 01-07-12    | Kenya          | Park et al. 2018   |  |
| 16404_4_80              | ERR984781               | 4.3.1.1         | 2012        | 01-07-12    | Kenya          | Park et al. 2018   |  |
| 16404_4_87              | ERR984788               | 4.3.1.1         | 2012        | 01-07-12    | Kenya          | Park et al. 2018   |  |
| 16404_4_89              | ERR984790               | 4.3.1.1         | 2013        | 01-07-13    | Kenya          | Park et al. 2018   |  |
| 16404_5_35              | ERR984826               | 4.3.1.1         | 2012        | 01-07-12    | Kenya          | Park et al. 2018   |  |
| 16404_5_37              | ERR984828               | 4.3.1.1         | 2012        | 01-07-12    | Kenya          | Park et al. 2018   |  |
| 16404_5_44              | ERR984835               | 4.3.1.1         | 2012        | 01-07-12    | Kenya          | Park et al. 2018   |  |
| 16404_5_45              | ERR984836               | 4.3.1.1         | 2013        | 01-07-13    | Kenya          | Park et al. 2018   |  |
| 16404_5_51              | ERR984842               | 4.3.1.1         | 2012        | 01-07-12    | Kenya          | Park et al. 2018   |  |
| 16404_5_52              | ERR984843               | 4.3.1.1         | 2012        | 01-07-12    | Kenya          | Park et al. 2018   |  |
| 16404_5_53              | ERR984844               | 4.3.1.1         | 2012        | 01-07-12    | Kenya          | Park et al. 2018   |  |
| 16404_5_60              | ERR984851               | 4.3.1.1         | 2012        | 01-07-12    | Kenya          | Park et al. 2018   |  |
| 16404_5_68              | ERR984859               | 4.3.1.1         | 2012        | 01-07-12    | Kenya          | Park et al. 2018   |  |
| 16404_5_76              | ERR984867               | 4.3.1.1         | 2012        | 01-07-12    | Kenya          | Park et al. 2018   |  |
| 16404_5_77              | ERR984868               | 4.3.1.1         | 2012        | 01-07-12    | Kenya          | Park et al. 2018   |  |
| 16404_5_84              | ERR984875               | 4.3.1.1         | 2012        | 01-07-12    | Kenya          | Park et al. 2018   |  |

|            |            |         |      |          |       |                  |
|------------|------------|---------|------|----------|-------|------------------|
| 16404_5_85 | ERR984876  | 4.3.1.1 | 2012 | 01-07-12 | Kenya | Park et al. 2018 |
| 16549_7_18 | ERR1010016 | 4.3.1.1 | 2012 | 01-07-12 | Kenya | Park et al. 2018 |
| 16549_7_20 | ERR1010018 | 4.3.1.1 | 2012 | 01-07-12 | Kenya | Park et al. 2018 |
| 16549_7_23 | ERR1010021 | 4.3.1.1 | 2012 | 01-07-12 | Kenya | Park et al. 2018 |
| 16549_8_1  | ERR1010089 | 4.3.1.1 | 2012 | 01-07-12 | Kenya | Park et al. 2018 |
| 16549_8_10 | ERR1010098 | 4.3.1.1 | 2012 | 01-07-12 | Kenya | Park et al. 2018 |
| 16549_8_16 | ERR1010104 | 4.3.1.1 | 2012 | 01-07-12 | Kenya | Park et al. 2018 |
| 16549_8_17 | ERR1010105 | 4.3.1.1 | 2012 | 01-07-12 | Kenya | Park et al. 2018 |
| 16549_8_18 | ERR1010106 | 4.3.1.1 | 2012 | 01-07-12 | Kenya | Park et al. 2018 |
| 16549_8_2  | ERR1010090 | 4.3.1.1 | 2012 | 01-07-12 | Kenya | Park et al. 2018 |
| 16549_8_31 | ERR1010119 | 4.3.1.1 | 2013 | 01-07-13 | Kenya | Park et al. 2018 |
| 16549_8_33 | ERR1010121 | 4.3.1.1 | 2012 | 01-07-12 | Kenya | Park et al. 2018 |
| 16549_8_47 | ERR1010133 | 4.3.1.1 | 2012 | 01-07-12 | Kenya | Park et al. 2018 |
| 16549_8_48 | ERR1010134 | 4.3.1.1 | 2012 | 01-07-12 | Kenya | Park et al. 2018 |
| 16549_8_54 | ERR1010140 | 4.3.1.1 | 2012 | 01-07-12 | Kenya | Park et al. 2018 |
| 16549_8_63 | ERR1010148 | 4.3.1.1 | 2012 | 01-07-12 | Kenya | Park et al. 2018 |
| 16549_8_8  | ERR1010096 | 4.3.1.1 | 2012 | 01-07-12 | Kenya | Park et al. 2018 |
| 16549_8_9  | ERR1010097 | 4.3.1.1 | 2012 | 01-07-12 | Kenya | Park et al. 2018 |
| 16404_5_75 | ERR984866  | 4.3.1.1 | 2012 | 01-07-12 | Kenya | Park et al. 2018 |
| 16404_4_82 | ERR984783  | 4.3.1.1 | 2012 | 01-07-12 | Kenya | Park et al. 2018 |
| 16404_4_53 | ERR984755  | 4.3.1.1 | 2012 | 01-07-12 | Kenya | Park et al. 2018 |
| 16549_8_26 | ERR1010114 | 4.3.1.1 | 2012 | 01-07-12 | Kenya | Park et al. 2018 |
| 16404_5_59 | ERR984850  | 4.3.1.1 | 2012 | 01-07-12 | Kenya | Park et al. 2018 |
| 16404_5_61 | ERR984852  | 4.3.1.1 | 2012 | 01-07-12 | Kenya | Park et al. 2018 |
| 16404_6_3  | ERR984885  | 4.3.1.1 | 2012 | 01-07-12 | Kenya | Park et al. 2018 |
| 16404_6_35 | ERR984917  | 4.3.1.1 | 2012 | 01-07-12 | Kenya | Park et al. 2018 |
| 16549_8_25 | ERR1010113 | 4.3.1.1 | 2012 | 01-07-12 | Kenya | Park et al. 2018 |
| 16549_8_7  | ERR1010095 | 4.3.1.1 | 2013 | 01-07-13 | Kenya | Park et al. 2018 |
| 16549_8_71 | ERR1010156 | 4.3.1.1 | 2012 | 01-07-12 | Kenya | Park et al. 2018 |
| 10071_8_62 | ERR338131  | 4.3.1.1 | 2007 | 01-07-07 | Kenya | Wong et al. 2016 |



|            |           |         |      |          |       |                  |
|------------|-----------|---------|------|----------|-------|------------------|
| 10071_8_63 | ERR338132 | 4.3.1.1 | 2008 | 01-07-08 | Kenya | Wong et al. 2016 |
| 10071_8_64 | ERR338133 | 4.3.1.1 | 2007 | 01-07-07 | Kenya | Wong et al. 2016 |
| 10071_8_67 | ERR338136 | 4.3.1.1 | 2008 | 01-07-08 | Kenya | Wong et al. 2016 |
| 10071_8_68 | ERR338137 | 4.3.1.1 | 2007 | 01-07-07 | Kenya | Wong et al. 2016 |
| 10071_8_70 | ERR338139 | 4.3.1.1 | 2008 | 01-07-08 | Kenya | Wong et al. 2016 |
| 10071_8_71 | ERR338140 | 4.3.1.1 | 2009 | 01-07-09 | Kenya | Wong et al. 2016 |
| 10071_8_72 | ERR338141 | 4.3.1.1 | 2007 | 01-07-07 | Kenya | Wong et al. 2016 |
| 10071_8_74 | ERR338143 | 4.3.1.1 | 2008 | 01-07-08 | Kenya | Wong et al. 2016 |
| 10071_8_76 | ERR338145 | 4.3.1.1 | 2007 | 01-07-07 | Kenya | Wong et al. 2016 |
| 10071_8_78 | ERR338147 | 4.3.1.1 | 2008 | 01-07-08 | Kenya | Wong et al. 2016 |
| 10071_8_79 | ERR338148 | 4.3.1.1 | 2007 | 01-07-07 | Kenya | Wong et al. 2016 |
| 10071_8_82 | ERR338151 | 4.3.1.1 | 2008 | 01-07-08 | Kenya | Wong et al. 2016 |
| 10071_8_83 | ERR338152 | 4.3.1.1 | 2007 | 01-07-07 | Kenya | Wong et al. 2016 |
| 10071_8_88 | ERR338157 | 4.3.1.1 | 2007 | 01-07-07 | Kenya | Wong et al. 2016 |
| 10071_8_90 | ERR338159 | 4.3.1.1 | 2009 | 01-07-09 | Kenya | Wong et al. 2016 |
| 10071_8_91 | ERR338160 | 4.3.1.1 | 2008 | 01-07-08 | Kenya | Wong et al. 2016 |
| 10071_8_94 | ERR338163 | 4.3.1.1 | 2008 | 01-07-08 | Kenya | Wong et al. 2016 |
| 10071_8_95 | ERR338164 | 4.3.1.1 | 2007 | 01-07-07 | Kenya | Wong et al. 2016 |
| 8525_2_54  | ERR212564 | 4.3.1.1 | 2008 | 01-07-08 | Kenya | Wong et al. 2016 |
| 8525_3_30  | ERR212636 | 4.3.1.1 | 2008 | 01-07-08 | Kenya | Wong et al. 2016 |
| 8525_3_32  | ERR212638 | 4.3.1.1 | 2008 | 01-07-08 | Kenya | Wong et al. 2016 |
| 8525_3_33  | ERR212639 | 4.3.1.1 | 2008 | 01-07-08 | Kenya | Wong et al. 2016 |
| 8525_3_34  | ERR212640 | 4.3.1.1 | 2008 | 01-07-08 | Kenya | Wong et al. 2016 |
| 8525_3_37  | ERR212643 | 4.3.1.1 | 2008 | 01-07-08 | Kenya | Wong et al. 2016 |
| 8525_3_40  | ERR212646 | 4.3.1.1 | 2008 | 01-07-08 | Kenya | Wong et al. 2016 |
| 8525_3_42  | ERR212648 | 4.3.1.1 | 2008 | 01-07-08 | Kenya | Wong et al. 2016 |
| 8525_3_45  | ERR212651 | 4.3.1.1 | 2008 | 01-07-08 | Kenya | Wong et al. 2016 |
| 8525_3_46  | ERR212652 | 4.3.1.1 | 2008 | 01-07-08 | Kenya | Wong et al. 2016 |
| 8525_3_47  | ERR212653 | 4.3.1.1 | 2008 | 01-07-08 | Kenya | Wong et al. 2016 |
| 8525_3_48  | ERR212654 | 4.3.1.1 | 2008 | 01-07-08 | Kenya | Wong et al. 2016 |

|             |            |         |      |          |       |                  |  |
|-------------|------------|---------|------|----------|-------|------------------|--|
| 8525_3_49   | ERR212655  | 4.3.1.1 | 2008 | 01-07-08 | Kenya | Wong et al. 2016 |  |
| 8525_3_51   | ERR212657  | 4.3.1.1 | 2008 | 01-07-08 | Kenya | Wong et al. 2016 |  |
| 8525_3_53   | ERR212659  | 4.3.1.1 | 2008 | 01-07-08 | Kenya | Wong et al. 2016 |  |
| 8525_3_54   | ERR212660  | 4.3.1.1 | 2008 | 01-07-08 | Kenya | Wong et al. 2016 |  |
| 8525_3_55   | ERR212661  | 4.3.1.1 | 2008 | 01-07-08 | Kenya | Wong et al. 2016 |  |
| 8525_3_56   | ERR212662  | 4.3.1.1 | 2008 | 01-07-08 | Kenya | Wong et al. 2016 |  |
| 8525_3_58   | ERR212664  | 4.3.1.1 | 2008 | 01-07-08 | Kenya | Wong et al. 2016 |  |
| 8525_3_59   | ERR212665  | 4.3.1.1 | 2008 | 01-07-08 | Kenya | Wong et al. 2016 |  |
| 8525_3_60   | ERR212666  | 4.3.1.1 | 2008 | 01-07-08 | Kenya | Wong et al. 2016 |  |
| 8525_3_61   | ERR212667  | 4.3.1.1 | 2008 | 01-07-08 | Kenya | Wong et al. 2016 |  |
| 8615_4_29   | ERR217406  | 4.3.1.1 | 2004 | 01-07-04 | Kenya | Wong et al. 2016 |  |
| 16404_4_39  | ERR984741  | 4.3.1.2 | 2013 | 01-07-13 | Kenya | Park et al. 2018 |  |
| 16404_5_69  | ERR984860  | 4.3.1.2 | 2013 | 01-07-13 | Kenya | Park et al. 2018 |  |
| 16549_7_5   | ERR1010004 | 4.3.1.2 | 2013 | 01-07-13 | Kenya | Park et al. 2018 |  |
| 16549_8_34  | ERR1010122 | 4.3.1.2 | 2013 | 01-07-13 | Kenya | Park et al. 2018 |  |
| 10071_8_65  | ERR338134  | 4.3.1.2 | 2007 | 01-07-07 | Kenya | Wong et al. 2016 |  |
| 10071_8_66  | ERR338135  | 4.3.1.2 | 2007 | 01-07-07 | Kenya | Wong et al. 2016 |  |
| 10071_8_69  | ERR338138  | 4.3.1.2 | 2007 | 01-07-07 | Kenya | Wong et al. 2016 |  |
| 10071_8_77  | ERR338146  | 4.3.1.2 | 2007 | 01-07-07 | Kenya | Wong et al. 2016 |  |
| 10071_8_80  | ERR338149  | 4.3.1.2 | 2007 | 01-07-07 | Kenya | Wong et al. 2016 |  |
| 10071_8_81  | ERR338150  | 4.3.1.2 | 2007 | 01-07-07 | Kenya | Wong et al. 2016 |  |
| 10071_8_89  | ERR338158  | 4.3.1.2 | 2007 | 01-07-07 | Kenya | Wong et al. 2016 |  |
| 10071_8_92  | ERR338161  | 4.3.1.2 | 2008 | 01-07-08 | Kenya | Wong et al. 2016 |  |
| 8525_3_31   | ERR212637  | 4.3.1.2 | 2008 | 01-07-08 | Kenya | Wong et al. 2016 |  |
| 8525_3_71   | ERR212677  | 4.3.1.2 | 2001 | 01-07-01 | Kenya | Wong et al. 2016 |  |
| 22204_7_274 | ERR3332596 | 4.3.1.1 | 2014 | 16-01-14 | Kenya | This study       |  |
| 24276_3_143 | ERR3332776 | 4.3.1.2 | 2016 | 18-07-16 | Kenya | This study       |  |
| 22306_3_253 | ERR3332773 | 4.3.1.2 | 2016 | 11-07-16 | Kenya | This study       |  |
| 22306_3_248 | ERR3332770 | 4.3.1.2 | 2014 | 22-09-14 | Kenya | This study       |  |
| 22306_3_247 | ERR3332769 | 4.3.1.1 | 2014 | 15-09-14 | Kenya | This study       |  |



|             |            |         |      |          |       |            |  |
|-------------|------------|---------|------|----------|-------|------------|--|
| 22306_3_244 | ERR3332766 | 4.3.1.2 | 2016 | 13-07-16 | Kenya | This study |  |
| 22306_3_228 | ERR3332758 | 4.3.1.2 | 2014 | 08-09-14 | Kenya | This study |  |
| 22306_3_225 | ERR3332755 | 4.3.1.1 | 2014 | 10-03-14 | Kenya | This study |  |
| 22306_3_218 | ERR3332750 | 4.3.1.1 | 2015 | 12-03-15 | Kenya | This study |  |
| 22306_3_207 | ERR3332746 | 4.3.1.1 | 2014 | 21-07-14 | Kenya | This study |  |
| 22306_3_206 | ERR3332745 | 4.3.1.1 | 2013 | 03-09-13 | Kenya | This study |  |
| 22306_3_205 | ERR3332744 | 4.3.1.1 | 2013 | 23-09-13 | Kenya | This study |  |
| 22306_3_204 | ERR3332743 | 4.3.1.2 | 2014 | 05-03-14 | Kenya | This study |  |
| 22306_3_200 | ERR3332740 | 4.3.1.2 | 2014 | 26-05-14 | Kenya | This study |  |
| 22306_3_197 | ERR3332737 | 4.3.1.1 | 2014 | 01-09-14 | Kenya | This study |  |
| 24276_3_244 | ERR2909580 | 4.3.1.2 | 2014 | 03-03-14 | Kenya | This study |  |
| 22306_3_191 | ERR3332731 | 4.3.1.2 | 2013 | 07-12-13 | Kenya | This study |  |
| 22306_3_188 | ERR3332729 | 4.3.1.2 | 2014 | 03-04-14 | Kenya | This study |  |
| 22306_3_185 | ERR3332727 | 4.3.1.2 | 2014 | 05-03-14 | Kenya | This study |  |
| 22306_3_184 | ERR3332726 | 4.3.1.1 | 2014 | 16-06-14 | Kenya | This study |  |
| 22204_8_178 | ERS3403506 | 4.3.1.1 | 2013 | 04-09-13 | Kenya | This study |  |
| 22306_3_177 | ERR3332719 | 4.3.1.2 | 2013 | 04-09-13 | Kenya | This study |  |
| 24276_3_194 | ERR2909540 | 4.3.1.1 | 2014 | 08-07-14 | Kenya | This study |  |
| 22306_3_85  | ERR3332652 | 4.3.1.2 | 2014 | 06-03-14 | Kenya | This study |  |
| 22306_3_75  | ERR3332648 | 4.3.1.2 | 2013 | 30-09-13 | Kenya | This study |  |
| 22306_3_68  | ERR3332643 | 4.3.1.1 | 2014 | 03-07-14 | Kenya | This study |  |
| 22306_3_67  | ERR3332642 | 4.3.1.2 | 2014 | 09-07-14 | Kenya | This study |  |
| 22306_3_66  | ERR3332641 | 4.3.1.1 | 2014 | 13-02-14 | Kenya | This study |  |
| 22306_3_56  | ERR3332634 | 4.3.1.1 | 2013 | 03-09-13 | Kenya | This study |  |
| 22306_3_55  | ERR3332633 | 4.3.1.1 | 2014 | 11-06-14 | Kenya | This study |  |
| 22306_3_38  | ERR3332623 | 4.3.1.1 | 2013 | 26-09-13 | Kenya | This study |  |
| 24276_3_113 | ERR2909474 | 4.3.1.1 | 2015 | 28-08-15 | Kenya | This study |  |
| 22306_3_27  | ERR3332617 | 4.3.1.2 | 2015 | 11-08-15 | Kenya | This study |  |
| 22306_3_164 | ERR3332709 | 4.3.1.2 | 2015 | 23-07-15 | Kenya | This study |  |
| 24276_3_184 | ERR2909536 | 4.3.1.2 | 2016 | 29-03-16 | Kenya | This study |  |

|             |            |         |      |          |       |            |  |
|-------------|------------|---------|------|----------|-------|------------|--|
| 22306_3_155 | ERR3332701 | 4.3.1.1 | 2015 | 08-07-15 | Kenya | This study |  |
| 22306_3_147 | ERR3332694 | 4.3.1.1 | 2016 | 03-05-16 | Kenya | This study |  |
| 24276_3_168 | ERR2909520 | 4.3.1.2 | 2015 | 02-07-15 | Kenya | This study |  |
| 22306_3_140 | ERR3332691 | 4.3.1.2 | 2015 | 02-07-15 | Kenya | This study |  |
| 22306_3_138 | ERR3332690 | 4.3.1.2 | 2015 | 03-07-15 | Kenya | This study |  |
| 24276_3_116 | ERR2909477 | 4.3.1.1 | 2015 | 28-09-15 | Kenya | This study |  |
| 22306_3_129 | ERR3332685 | 4.3.1.2 | 2016 | 13-06-16 | Kenya | This study |  |
| 22306_3_126 | ERR3332684 | 4.3.1.2 | 2014 | 23-07-14 | Kenya | This study |  |
| 24276_3_185 | ERR2909537 | 4.3.1.2 | 2016 | 06-04-16 | Kenya | This study |  |
| 22306_3_116 | ERR3332677 | 4.3.1.1 | 2016 | 07-06-16 | Kenya | This study |  |
| 22306_3_115 | ERR3332676 | 4.3.1.1 | 2016 | 02-06-16 | Kenya | This study |  |
| 22306_3_108 | ERR3332669 | 4.3.1.2 | 2015 | 08-07-15 | Kenya | This study |  |
| 22306_3_96  | ERR3332662 | 4.3.1.2 | 2014 | 04-02-14 | Kenya | This study |  |
| 22306_3_93  | ERR3332660 | 4.3.1.2 | 2016 | 11-01-16 | Kenya | This study |  |
| 22306_3_92  | ERR3332659 | 4.3.1.2 | 2015 | 02-11-15 | Kenya | This study |  |
| 24276_3_171 | ERR2909523 | 4.3.1.2 | 2015 | 01-10-15 | Kenya | This study |  |
| 24276_3_170 | ERR2909522 | 4.3.1.2 | 2015 | 13-08-15 | Kenya | This study |  |
| 24276_3_214 | ERR2909557 | 4.3.1.1 | 2013 | 12-10-13 | Kenya | This study |  |
| 24276_3_115 | ERR2909476 | 4.3.1.2 | 2015 | 14-09-15 | Kenya | This study |  |
| 24276_3_277 | ERR2909611 | 4.3.1.1 | 2013 | 21-11-13 | Kenya | This study |  |
| 24276_3_249 | ERR2909585 | 4.3.1.2 | 2013 | 23-09-13 | Kenya | This study |  |
| 24276_3_129 | ERR2909490 | 4.3.1.2 | 2016 | 10-02-16 | Kenya | This study |  |
| 24276_3_126 | ERR2909487 | 4.3.1.1 | 2016 | 26-01-16 | Kenya | This study |  |
| 24276_3_180 | ERR2909532 | 4.3.1.1 | 2016 | 08-02-16 | Kenya | This study |  |
| 22204_7_161 | ERR3332562 | 4.3.1.1 | 2013 | 11-11-13 | Kenya | This study |  |
| 24276_3_278 | ERR2909612 | 4.3.1.2 | 2013 | 27-11-13 | Kenya | This study |  |
| 24276_3_248 | ERR2909584 | 4.3.1.2 | 2013 | 23-09-13 | Kenya | This study |  |
| 24276_3_197 | ERR2909543 | 4.3.1.2 | 2013 | 20-08-13 | Kenya | This study |  |
| 24276_3_256 | ERR2909592 | 4.3.1.1 | 2015 | 03-06-15 | Kenya | This study |  |
| 24276_3_177 | ERR2909529 | 4.3.1.2 | 2016 | 28-01-16 | Kenya | This study |  |

|             |            |         |      |          |       |            |  |
|-------------|------------|---------|------|----------|-------|------------|--|
| 24276_3_155 | ERR2909508 | 4.3.1.1 | 2015 | 17-03-15 | Kenya | This study |  |
| 24276_3_247 | ERR2909583 | 4.3.1.2 | 2013 | 23-09-13 | Kenya | This study |  |
| 24276_3_159 | ERR2909511 | 4.3.1.2 | 2015 | 05-05-15 | Kenya | This study |  |
| 24276_3_193 | ERR2909539 | 4.3.1.2 | 2014 | 28-04-14 | Kenya | This study |  |
| 24276_3_164 | ERR2909516 | 4.3.1.2 | 2014 | 16-10-14 | Kenya | This study |  |
| 22204_7_146 | ERR3332556 | 4.3.1.2 | 2013 | 29-08-13 | Kenya | This study |  |
| 22204_7_145 | ERR3332555 | 4.3.1.1 | 2016 | 01-03-16 | Kenya | This study |  |
| 24276_3_122 | ERR2909483 | 4.3.1.1 | 2015 | 17-11-15 | Kenya | This study |  |
| 22204_7_142 | ERR2525481 | 4.3.1.1 | 2015 | 09-11-15 | Kenya | This study |  |
| 24276_3_135 | ERR2909496 | 4.3.1.2 | 2016 | 24-02-16 | Kenya | This study |  |
| 24276_3_226 | ERR2909568 | 4.3.1.1 | 2016 | 08-02-16 | Kenya | This study |  |
| 24276_3_153 | ERR2909506 | 4.3.1.2 | 2015 | 04-03-15 | Kenya | This study |  |
| 24276_3_157 | ERR2909509 | 4.3.1.2 | 2015 | 21-04-15 | Kenya | This study |  |
| 22204_7_130 | ERR3332551 | 4.3.1.1 | 2015 | 24-04-15 | Kenya | This study |  |
| 22204_7_122 | ERR3332548 | 4.3.1.1 | 2015 | 23-06-15 | Kenya | This study |  |
| 22204_7_115 | ERR3332546 | 4.3.1.2 | 2015 | 08-04-15 | Kenya | This study |  |
| 22204_7_111 | ERR3332545 | 4.3.1.2 | 2015 | 11-06-15 | Kenya | This study |  |
| 22204_7_107 | ERR3332543 | 4.3.1.2 | 2015 | 23-11-15 | Kenya | This study |  |
| 22204_7_105 | ERR3332542 | 4.3.1.2 | 2015 | 13-11-15 | Kenya | This study |  |
| 22204_7_104 | ERR3332541 | 4.3.1.2 | 2015 | 11-11-15 | Kenya | This study |  |
| 22204_7_97  | ERR3332539 | 4.3.1.1 | 2016 | 08-02-16 | Kenya | This study |  |
| 24276_3_272 | ERR2909608 | 4.3.1.2 | 2016 | 09-03-16 | Kenya | This study |  |
| 22204_7_95  | ERR2525467 | 4.3.1.1 | 2016 | 09-03-16 | Kenya | This study |  |
| 22204_7_262 | ERR2525516 | 4.3.1.2 | 2015 | 07-05-15 | Kenya | This study |  |
| 22204_7_261 | ERR2525515 | 4.3.1.1 | 2015 | 29-06-15 | Kenya | This study |  |
| 22204_7_258 | ERR3332591 | 4.3.1.2 | 2015 | 17-02-15 | Kenya | This study |  |
| 22204_7_256 | ERR3332589 | 4.3.1.2 | 2015 | 27-04-15 | Kenya | This study |  |
| 22204_7_251 | ERR2525508 | 4.3.1.2 | 2015 | 18-03-15 | Kenya | This study |  |
| 22204_7_243 | ERR3332587 | 4.3.1.2 | 2015 | 26-02-15 | Kenya | This study |  |
| 24276_3_152 | ERR2909505 | 4.3.1.1 | 2015 | 19-02-15 | Kenya | This study |  |

|             |            |         |      |          |       |            |  |
|-------------|------------|---------|------|----------|-------|------------|--|
| 22204_7_239 | ERR3332586 | 4.3.1.2 | 2015 | 03-06-15 | Kenya | This study |  |
| 24276_3_160 | ERR2909512 | 4.3.1.2 | 2015 | 26-05-15 | Kenya | This study |  |
| 24276_3_162 | ERR2909514 | 4.3.1.2 | 2015 | 08-06-15 | Kenya | This study |  |
| 22204_7_237 | ERR3332585 | 4.3.1.2 | 2015 | 12-06-15 | Kenya | This study |  |
| 22204_7_236 | ERR2525501 | 4.3.1.2 | 2015 | 12-06-15 | Kenya | This study |  |
| 24276_3_163 | ERR2909515 | 4.3.1.2 | 2015 | 15-06-15 | Kenya | This study |  |
| 22204_7_232 | ERR3332584 | 4.3.1.2 | 2015 | 21-05-15 | Kenya | This study |  |
| 22204_7_223 | ERR2525493 | 4.3.1.2 | 2015 | 13-04-15 | Kenya | This study |  |
| 22204_7_219 | ERR2525491 | 4.3.1.2 | 2015 | 12-05-15 | Kenya | This study |  |
| 24276_3_142 | ERR2909503 | 4.3.1.1 | 2015 | 15-01-15 | Kenya | This study |  |
| 24276_3_141 | ERR2909502 | 4.3.1.2 | 2015 | 13-01-15 | Kenya | This study |  |
| 22204_7_216 | ERR2525488 | 4.3.1.1 | 2015 | 14-01-15 | Kenya | This study |  |
| 22204_7_215 | ERR2525487 | 4.3.1.1 | 2016 | 25-02-16 | Kenya | This study |  |
| 24276_3_161 | ERR2909513 | 4.3.1.2 | 2015 | 08-06-15 | Kenya | This study |  |
| 22204_7_210 | ERR2525484 | 4.3.1.2 | 2015 | 19-10-15 | Kenya | This study |  |
| 24276_3_167 | ERR2909519 | 4.3.1.2 | 2015 | 04-06-15 | Kenya | This study |  |
| 22204_7_209 | ERR2525483 | 4.3.1.2 | 2015 | 26-10-15 | Kenya | This study |  |
| 24276_3_134 | ERR2909495 | 4.3.1.1 | 2016 | 24-02-16 | Kenya | This study |  |
| 24276_3_182 | ERR2909534 | 4.3.1.2 | 2016 | 22-02-16 | Kenya | This study |  |
| 22204_7_208 | ERR3332581 | 4.3.1.2 | 2016 | 09-11-16 | Kenya | This study |  |
| 22204_7_207 | ERR3332580 | 4.3.1.2 | 2016 | 17-11-16 | Kenya | This study |  |
| 24276_3_146 | ERR3332777 | 4.3.1.1 | 2016 | 03-10-16 | Kenya | This study |  |
| 22204_7_193 | ERR3332578 | 4.3.1.2 | 2016 | 26-09-16 | Kenya | This study |  |
| 22204_7_188 | ERR3332577 | 4.3.1.2 | 2016 | 25-10-16 | Kenya | This study |  |
| 24276_3_149 | ERR3332778 | 4.3.1.1 | 2016 | 26-10-16 | Kenya | This study |  |
| 22204_7_185 | ERR3332576 | 4.3.1.1 | 2016 | 11-10-16 | Kenya | This study |  |
| 22204_7_184 | ERR3332575 | 4.3.1.1 | 2016 | 11-10-16 | Kenya | This study |  |
| 22204_7_181 | ERR3332574 | 4.3.1.2 | 2016 | 24-10-16 | Kenya | This study |  |
| 24276_3_276 | ERR3332782 | 4.3.1.2 | 2016 | 25-10-16 | Kenya | This study |  |
| 24276_3_150 | ERR3332779 | 4.3.1.1 | 2016 | 03-11-16 | Kenya | This study |  |

|             |            |         |      |          |       |            |  |
|-------------|------------|---------|------|----------|-------|------------|--|
| 24276_3_238 | ERR3332780 | 4.3.1.1 | 2016 | 10-10-16 | Kenya | This study |  |
| 22204_7_180 | ERR3332573 | 4.3.1.1 | 2016 | 13-10-16 | Kenya | This study |  |
| 22306_3_57  | ERR3332635 | 4.3.1.2 | 2014 | 10-10-14 | Kenya | This study |  |

# **Supplementary Table 4. Culture positive typhoid cases and asymptomatic carriers**

| <b><u>Typhoid Cases</u></b>                                | <b>Total</b> | <b>&lt;=1 year</b> | <b>1-7 years</b> | <b>7-16 years</b> | <b>Linear regression association with age (p-value)</b> |
|------------------------------------------------------------|--------------|--------------------|------------------|-------------------|---------------------------------------------------------|
| Febrile participants subjected to stool and blood culture  | 4,670        | 630                | 3,299            | 741               | -                                                       |
| <i>S. Typhi</i> positive                                   | 148 (3.2%)   | 14 (2.2%)          | 102 (3.1%)       | 32 (4.3%)         | 0.000525*                                               |
| - Female                                                   | 49 (1.0%)    | 6 (0.95%)          | 36 (1.1%)        | 7 (0.94%)         | 0.536                                                   |
| - Male                                                     | 99 (2.1%)    | 8 (1.3%)           | 66 (2.0%)        | 25 (3.4%)         | 0.0000773*                                              |
| WGS confirmed <i>S. Typhi</i> positive                     | 100 (2.1%)   | 7 (1.1%)           | 67 (2.0%)        | 26 (3.5%)         | 0.0001*                                                 |
| - Female                                                   | 36 (0.77%)   | 4 (0.63%)          | 25 (0.76%)       | 7 (0.94%)         | 0.508                                                   |
| - Male                                                     | 64 (1.4%)    | 3 (0.48%)          | 42 (1.27%)       | 19 (2.6%)         | 0.000009*                                               |
| <b><u>Asymptomatic Carriers</u></b>                        | <b>8,549</b> | <b>641</b>         | <b>5,495</b>     | <b>2,413</b>      | <b>-</b>                                                |
| Total stool cultures from non-febrile age-matched controls | 8,530        | 641                | 5,480            | 2,409             | -                                                       |
| <i>S. Typhi</i> positive                                   | 95 (1.1%)    | 4 (0.62%)          | 62 (1.1%)        | 29 (1.2%)         | 0.402                                                   |
| - Female                                                   | 46 (0.54%)   | 3 (0.47%)          | 31 (0.57%)       | 12 (0.50%)        | 0.585                                                   |
| - Male                                                     | 49 (0.57%)   | 1 (0.16%)          | 31 (0.57%)       | 17 (0.71%)        | 0.081                                                   |
| WGS confirmed <i>S. Typhi</i> positive                     | 55 (0.64%)   | 4 (0.62%)          | 31 (0.57%)       | 20 (0.83%)        | 0.256                                                   |
| - Female                                                   | 29 (0.34%)   | 3 (0.47%)          | 16 (0.29%)       | 10 (0.42%)        | 0.909                                                   |
| - Male                                                     | 26 (0.30%)   | 1 (0.16%)          | 15 (0.27%)       | 10 (0.42%)        | 0.127                                                   |

**Supplementary Table 5 – Comparison of phenotypic and genotypic AMR profiles of 136 (n=128 H58, n=8 Non-H58) high quality *S. Typhi* genome sequences**

| <u>Drug class</u>                      | <u>Resistant phenotype*</u> | <u>Resistant genotype</u> | <u>Very major error</u> | <u>Susceptible phenotype</u> | <u>Susceptible genotype</u> | <u>Major error</u> | <u>Sensitivity</u> | <u>Specificity</u> | <u>PPV</u> |
|----------------------------------------|-----------------------------|---------------------------|-------------------------|------------------------------|-----------------------------|--------------------|--------------------|--------------------|------------|
| <b>Beta-lactamases</b>                 |                             |                           |                         |                              |                             |                    |                    |                    |            |
| Ampicillin                             | 100                         | 95                        | 5 (3.7%)                | 36                           | 28                          | 8 (5.9%)           | 95%                | 77.8 %             | 92.2%      |
| Ceftazidime                            | 1                           | 0                         | 1 (0.74%)               | 135                          | 135                         | 0                  | 0%                 | 100%               | 0%         |
| Cefotaxime                             | 4                           | 0                         | 4 (2.9%)                | 132                          | 132                         | 0                  | 0%                 | 100%               | 0%         |
| Ceftriaxone                            | 1                           | 0                         | 1 (0.74%)               | 135                          | 135                         | 0                  | 0%                 | 100%               | 0%         |
| Cefpodoxime                            | 4                           | 0                         | 4 (2.9%)                | 132                          | 132                         | 0                  | 0%                 | 100%               | 0%         |
| <b>Chloramphenicol</b>                 |                             |                           |                         |                              |                             |                    |                    |                    |            |
| Chloramphenicol                        | 93                          | 92                        | 1 (0.74%)               | 43                           | 32                          | 10 (7.4%)          | 98.9%              | 74.4%              | 89.3%      |
| <b>Tetracyclines</b>                   |                             |                           |                         |                              |                             |                    |                    |                    |            |
| Tetracycline                           | 69                          | 65                        | 4 (2.9%)                | 67                           | 59                          | 8 (5.9%)           | 94.2%              | 88.1%              | 89.0%      |
| <b>Folate pathway inhibitors</b>       |                             |                           |                         |                              |                             |                    |                    |                    |            |
| Co-trimoxazole                         | 98                          | 96                        | 2 (1.5%)                | 38                           | 31                          | 7 (5.1%)           | 98.0%              | 81.6%              | 93.2%      |
| <b>Quinolones and Fluoroquinolones</b> |                             |                           |                         |                              |                             |                    |                    |                    |            |
| Ciprofloxacin                          | 63                          | 55                        | 8 (5.9%)                | 73                           | 41                          | 32 (23.5%)         | 87.3%              | 56.2%              | 63.2%      |
| Nalidixic acid                         | 65                          | 21                        | 44 (32.4%)              | 71                           | 71                          | 0                  | 32.3%              | 100%               | 100%       |

\*indicates where resistant and intermediate phenotypes have been combined as resistant

**Supplementary Table 6 – Distribution of n=153 *S. Typhi* genotypes among each sex for cases and controls**

|  | <u>Female</u> | <u>Male</u> |
|--|---------------|-------------|
|--|---------------|-------------|

|                               |            |            |
|-------------------------------|------------|------------|
| <b>WGS-confirmed cases</b>    | <b>35</b>  | <b>64</b>  |
| EA1                           | 12 (34.3%) | 23 (35.9%) |
| EA2                           | 16 (45.7%) | 30 (46.9%) |
| EA3                           | 4 (11.4%)  | 11 (17.9%) |
| non-H58                       | 3 (8.57%)  | 0          |
| <b>WGS-confirmed carriers</b> | <b>28</b>  | <b>26</b>  |
| EA1                           | 10 (35.7%) | 10 (38.5%) |
| EA2                           | 18 (64.3%) | 9 (34.6%)  |
| EA3                           | 0          | 2 (7.69%)  |
| non-H58                       | 0          | 5 (19.2%)  |

**Supplementary table 7 - Climatic predictors of elevated case and carrier counts for all samples**

| <b>Typhoid Cases</b>             |                   |         |                  |         |                 |         |
|----------------------------------|-------------------|---------|------------------|---------|-----------------|---------|
| Month                            | Same month        |         | Previous month   |         | 2 months prior  |         |
|                                  | OR (95% CI)       | p-value | OR (95% CI)      | p-value | OR (95% CI)     | p-value |
| Rainfall (precipitation) > 75 mm | 0.65 (0.13-3.2)   | 0.72    | 0.85 (0.17-4.4)  | 1       | 2.4 (0.46-17.1) | 0.29    |
| Minimum temperature >14°C        | 0.17 (0.025-0.86) | 0.022*  | 0.39 (0.080-1.7) | 0.20    | 0.60 (0.13-2.6) | 0.53    |
| Maximum temperature >26°C        | 0.43 (0.094-1.8)  | 0.22    | 0.43 (0.094-1.8) | 0.22    | 0.55 (0.12-2.3) | 0.52    |
| <b>Asymptomatic Carriers</b>     |                   |         |                  |         |                 |         |
| Month                            | Same month        |         | Previous month   |         | 2 months prior  |         |
|                                  | OR (95% CI)       | p-value | OR (95% CI)      | p-value | OR (95% CI)     | p-value |
| Rainfall (precipitation) > 75 mm | 0.95 (0.19-4.5)   | 1       | 1.18 (0.23-5.9)  | 1       | 1.18 (0.23-5.9) | 1       |
| Minimum temperature >14°C        | 0.16 (0.029-0.74) | 0.0095* | 0.72 (0.17-3.1)  | 0.75    | 1.1 (0.26-4.7)  | 1       |
| Maximum temperature >26°C        | 0.19 (0.037-0.86) | 0.024*  | 0.30 (0.063-1.3) | 0.11    | 0.82 (0.19-3.4) | 1       |

Values in cells are odds ratios and p-values for Fisher's exact test between high case/control count and high rainfall/temperature. \* highlights p-value <0.05.

**Supplementary Table 8: nonsynonymous (NS) Mutations among S. Typhi isolates**

| Lane_and_tree_ID | Accession_number | Status  | Study_area | Position_in_Ancestral | Allele | CT18_Gene_Classification | Gene_product/Functional | Codon                        | Ancestor | CoDerived | CodAncestor | AnDerived | Am | Mutation      |
|------------------|------------------|---------|------------|-----------------------|--------|--------------------------|-------------------------|------------------------------|----------|-----------|-------------|-----------|----|---------------|
| 22204_8_178      | ERS3403506       | Control | Yes        | 4626124               | C      | A                        | ytfM/STY4764.1.0        | Putative expiPeriplasmic/    | 322 AAC  | AAA       | N           | K         |    | ytfM-N322K    |
| 24276_3_116      | ERS1909313       | Case    | No         | 4021517               | G      | A                        | yjhW/STY4164.1.1        | putative merInner membi      | 168 GGC  | AGC       | G           | S         |    | yjhW-G168S    |
| 24276_3_116      | ERS1909313       | Case    | No         | 3385249               | C      | T                        | yhcP/STY3544.1.1        | Putative merInner membi      | 106 TGT  | TAT       | C           | Y         |    | yhcP-C106Y    |
| 22204_7_236      | ERS1573056       | Control | Yes        | 2171000               | G      | A                        | yegD/STY2330.0.2        | conserved hyUnknown fur      | 183 GCC  | ACC       | A           | T         |    | yegD-A183T    |
| 22306_3_66       | ERS3403489       | Case    | No         | 962807                | T      | C                        | ycalM/STY0915.0         | Probable traTransport/bi     | 440 TTC  | CTC       | F           | L         |    | ycalM-F440L   |
| 22204_7_145      | ERS3403339       | Case    | Yes        | 868216                | T      | G                        | ybir/STY0874.1.1        | Putative merInner membi      | 322 TTT  | GTT       | F           | V         |    | ybir-F322V    |
| 24276_3_146      | ERS3403282       | Case    | No         | 662248                | A      | G                        | ybdQ/STY0600.0.2        | Conserved hyUnknown fur      | 128 TCA  | CCA       | S           | P         |    | ybdQ-S128P    |
| 22204_7_236      | ERS1573056       | Control | Yes        | 2143349               | T      | G                        | wzc/STY2314.1.4         | putative tranSurface poly    | 26 TTA   | TTT       | L           | F         |    | wzc-L26F      |
| 22204_7_130      | ERS3403329       | Control | Yes        | 2160205               | A      | C                        | wza/STY23314.1.4        | Putative polySurface poly    | 137 GTC  | GGC       | V           | G         |    | wza-V137G     |
| 24276_3_129      | ERS1909314       | Case    | No         | 4725276               | A      | T                        | uxuR/STY4866.1.1        | uxi operon tGlobal regula    | 71 ATC   | TTT       | I           | F         |    | uxuR-I71F     |
| 24276_3_159      | ERS1909348       | Control | No         | 4517487               | G      | A                        | twiE/STY4655.1.5        | Vi polysacchiSurface poly    | 263 CCG  | TCG       | P           | S         |    | twiE-P263S    |
| 24276_3_194      | ERS1909377       | Control | Yes        | 4521071               | G      | A                        | twiD/STY4655.1.5        | Vi polysacchiSurface poly    | 159 CGT  | TGT       | R           | C         |    | twiD-R159C    |
| 24276_3_135      | ERS1909320       | Case    | No         | 4523895               | C      | T                        | twiB/STY46615.1.5       | Vi polysacchiSurface poly    | 1 GTG    | ATG       | V           | M         |    | twiB-V1M      |
| 24276_3_149      | ERS3403283       | Case    | No         | 1282526               | G      | A                        | trpB/STY13231.1.19      | tryptophan sAmino acid b     | 35 GCG   | GTG       | A           | V         |    | trpB-A35V     |
| 24276_3_161      | ERS1909350       | Case    | No         | 4653330               | G      | A                        | treB/STY47915.37        | PTS system, tTransport/bi    | 323 ACC  | ATC       | T           | I         |    | treB-T323I    |
| 22204_7_111      | ERS3403322       | Control | Yes        | 4318042               | C      | T                        | STY4449                 | putative lipiPeriplasmic/    | 55 TGG   | TAG       | W           | *         |    | STY4449-W55*  |
| 24276_3_150      | ERS3403284       | Control | No         | 4104133               | C      | T                        | STY4236                 | putative merInner membi      | 43 TGG   | TAG       | W           | *         |    | STY4236-W43*  |
| 24276_3_194      | ERS1909377       | Control | Yes        | 4102295               | C      | T                        | STY4235                 | heavy metal-Transport/bi     | 420 GGC  | GAC       | G           | D         |    | STY4235-G420D |
| 24276_3_194      | ERS1909377       | Control | Yes        | 3788415               | G      | T                        | STY3925                 | probable PTSTransport/bi     | 38 GTT   | TTT       | V           | F         |    | STY3925-V38F  |
| 24276_3_146      | ERS3403282       | Case    | No         | 3695295               | G      | A                        | STY3837                 | putative lipiPeriplasmic/    | 36 GCG   | ACG       | A           | T         |    | STY3837-A36T  |
| 22204_7_216      | ERS1573035       | Case    | Yes        | 3628992               | G      | A                        | STY3765                 | hypothetical Unknown fur     | 377 CCG  | TCG       | P           | S         |    | STY3765-P377S |
| 22306_3_185      | ERS3403513       | Control | Yes        | 3471310               | A      | C                        | STY3618                 | Putative merInner membi      | 35 TTA   | GTA       | L           | V         |    | STY3618-L35V  |
| 24276_3_193      | ERS1909376       | Case    | Yes        | 3471046               | T      | C                        | STY3618                 | Putative merInner membi      | 123 ATT  | GTT       | I           | V         |    | STY3618-I123V |
| 24276_3_116      | ERS1909313       | Case    | No         | 3170381               | G      | T                        | STY3325                 | methyl-accepChemotaxis       | 493 GCG  | GAG       | A           | E         |    | STY3325-A493E |
| 24276_3_182      | ERS1909371       | Case    | Yes        | 3119041               | G      | A                        | STY3257                 | possible oxyBiosynthesis     | 82 GAC   | AAC       | D           | N         |    | STY3257-D82N  |
| 24276_3_194      | ERS1909377       | Control | Yes        | 2501788               | C      | T                        | STY2664                 | cell division tCell division | 299 GTC  | ATC       | V           | I         |    | STY2664-V299I |
| 22204_7_130      | ERS3403329       | Control | Yes        | 2480004               | G      | C                        | STY2645                 | Putative merInner membi      | 88 GAA   | CAA       | E           | Q         |    | STY2645-E88Q  |
| 22204_7_274      | ERS3403567       | Case    | Yes        | 2399174               | G      | T                        | STY2563                 | putative sodiUnclassified/   | 557 TCC  | TAC       | S           | Y         |    | STY2563-S557Y |
| 22204_7_216      | ERS1573035       | Case    | Yes        | 2333750               | T      | C                        | STY2499                 | DNA gyrase sDNA - replica    | 87 GAC   | GGC       | D           | G         |    | gyrA-D87G     |
| 22306_3_207      | ERS3403522       | Case    | Yes        | 2333750               | T      | C                        | STY2499                 | DNA gyrase sDNA - replica    | 87 GAC   | GGC       | D           | G         |    | gyrA-D87G     |
| 22204_7_232      | ERS3403299       | Control | Yes        | 2194420               | G      | A                        | STY2361                 | putative expiPeriplasmic/    | 100 CCA  | CTA       | P           | L         |    | STY2361-P100L |
| 22204_7_207      | ERS3403295       | Case    | Yes        | 2051377               | G      | A                        | STY2216                 | putative inneInner membi     | 397 GCC  | GTG       | A           | V         |    | STY2216-A397V |
| 22306_3_66       | ERS3403489       | Case    | No         | 1749811               | G      | T                        | STY1831                 | Conserved hyUnknown fur      | 110 GGA  | TGA       | G           | *         |    | STY1831-G110* |
| 22204_7_274      | ERS3403567       | Case    | Yes        | 1670239               | G      | A                        | STY1750                 | putative amiCentral interi   | 9 CGG    | TGG       | R           | W         |    | STY1750-R9W   |
| 22306_3_66       | ERS3403489       | Case    | No         | 1533338               | T      | C                        | STY1587                 | putative merInner membi      | 77 GTA   | GCA       | V           | A         |    | STY1587-V77A  |
| 22204_7_105      | ERS3403315       | Case    | No         | 1491452               | G      | G                        | STY1537                 | putative regGlobal regula    | 42 GAC   | GGC       | D           | G         |    | STY1537-D42G  |
| 22204_7_208      | ERS3403296       | Case    | No         | 1456243               | G      | A                        | STY1409                 | hypothetical Unknown fur     | 187 CAA  | TAA       | Q           | *         |    | STY1409-Q187* |
| 22306_3_66       | ERS3403489       | Case    | No         | 1410841               | T      | C                        | STY1460                 | putative pepDegradation      | 250 TAT  | CAT       | Y           | H         |    | STY1460-Y250H |
| 22204_7_237      | ERS3403300       | Case    | Yes        | 1396606               | C      | T                        | STY1434                 | putative expiPeriplasmic/    | 185 CAG  | TAG       | Q           | *         |    | STY1443-Q185* |
| 22306_3_66       | ERS3403489       | Case    | No         | 1385997               | T      | C                        | STY1434                 | putative merInner membi      | 274 AAC  | AGC       | N           | S         |    | STY1434-N274S |
| 24276_3_116      | ERS1909313       | Case    | No         | 1369705               | C      | T                        | STY1419                 | probable pyr Unclassified/   | 613 GCG  | ACG       | A           | T         |    | STY1419-A613T |
| 22204_7_216      | ERS1573035       | Case    | Yes        | 1239385               | T      | C                        | STY1284                 | putative invaPathogenicity   | 466 TGG  | CGG       | W           | R         |    | STY1284-W466R |
| 24276_3_135      | ERS1909320       | Case    | No         | 1061235               | A      | G                        | STY1083                 | ABC TransporTransport/bi     | 64 CAG   | CGG       | Q           | R         |    | STY1083-Q64R  |
| 22204_7_130      | ERS3403329       | Control | Yes        | 339327                | G      | A                        | STY0326                 | conserved hyPathogenicity    | 84 TGG   | TGA       | W           | *         |    | STY0326-W84*  |
| 24276_3_150      | ERS3403284       | Control | No         | 337744                | C      | T                        | STY0324                 | Rhs-family pyrPathogenicity  | 427 CAG  | TAG       | Q           | *         |    | STY0324-Q427* |
| 22204_7_216      | ERS1573035       | Case    | Yes        | 319124                | C      | T                        | STY0306                 | Putative merPathogenicity    | 36 CGT   | TGT       | R           | C         |    | STY0306-R36C  |
| 22204_7_216      | ERS1573035       | Case    | Yes        | 306487                | C      | T                        | STY0290                 | conserved hyPathogenicity    | 151 CGC  | CAC       | R           | H         |    | STY0290-H151H |
| 22204_7_130      | ERS3403329       | Control | Yes        | 306208                | C      | T                        | STY0289                 | hypothetical Pathogenicity   | 74 CGG   | CAG       | R           | Q         |    | STY0289-R74Q  |
| 22204_7_216      | ERS1573035       | Case    | Yes        | 1641786               | G      | A                        | sscA/STY1725.1.5        | putative TypiPathogenicity   | 142 CTC  | TTT       | L           | F         |    | sscA-L142F    |
| 24276_3_194      | ERS1909377       | Control | Yes        | 1874307               | G      | A                        | sopE2/STY1915.1.5       | putative invaPathogenicity   | 9 CAG    | TAG       | Q           | *         |    | sopE2-Q9*     |
| 22204_7_232      | ERS3403299       | Control | Yes        | 4603536               | C      | T                        | sgaH/STY4743.3.15       | putative hexiCentral interi  | 186 CAT  | TAT       | H           | Y         |    | sgaH-H186Y    |
| 24276_3_168      | ERS1909357       | Case    | Yes        | 4227390               | G      | A                        | rpsF/STY4354.2.2        | 30S ribosomeRibosome co      | 43 ATA   | ATA       | V           | I         |    | rpsG-V43I     |
| 22204_7_274      | ERS3403567       | Case    | Yes        | 4606083               | G      | A                        | rpsF/STY4744.2.2        | 30S ribosomeRibosome co      | 9 ATG    | ATA       | M           | I         |    | rpsF-M9I      |
| 24276_3_194      | ERS1909377       | Control | Yes        | 4794595               | C      | T                        | rob/STY4933.1.2.1       | right origin-bChromosome     | 185 CGC  | CAC       | R           | H         |    | STY4933-H185H |
| 22204_7_274      | ERS3403567       | Case    | Yes        | 219180                | C      | T                        | pcnB/STY02022.0.11      | poly(A) polyrRNA synthes     | 174 AGC  | AAC       | S           | N         |    | pcnB-S174N    |
| 22204_7_130      | ERS3403329       | Control | Yes        | 4080652               | C      | T                        | pitA/STY4214.15.23      | putative lowTransport/bi     | 340 CGT  | CAT       | R           | H         |    | STY4214-H340H |
| 22306_3_68       | ERS3403491       | Control | Yes        | 687449                | C      | T                        | pbpA/STY0654.1.2        | penicillin-binMurein sacc    | 409 GGT  | AGT       | G           | S         |    | mrdA-G409S    |
| 24276_3_150      | ERS3403284       | Control | No         | 3892927               | G      | T                        | msl/STY4035.1.5         | putative virulPathogenicity  | 402 CGC  | AGC       | R           | S         |    | msl-R402S     |
| 22204_7_274      | ERS3403567       | Case    | Yes        | 2216980               | G      | A                        | metG/STY2312.2.0.1      | methionyl-tRAmino acyl t     | 554 GCA  | ACA       | A           | T         |    | metG-A554T    |
| 24276_3_168      | ERS1909357       | Case    | Yes        | 4294622               | T      | G                        | malE/STY44215.03        | periplasmic rTransport/bi    | 340 GAC  | GCC       | D           | A         |    | malE-D340A    |
| 22306_3_66       | ERS3403489       | Case    | No         | 742865                | T      | C                        | kdpE/STY0746.1.1        | KDP operon tGlobal regula    | 3 AAC    | AGC       | N           | S         |    | kdpE-N3S      |
| 22204_7_232      | ERS3403299       | Control | Yes        | 2841954               | G      | A                        | hypl/STY2963.5.2        | hydrogenaseAnaerobic re      | 305 CCA  | CTA       | P           | L         |    | hydA-P305L    |
| 24276_3_150      | ERS3403284       | Control | No         | 1103229               | C      | A                        | hpcG/STY1133.4.3        | 2-oxo-hepta-Degradation      | 261 GCG  | GAG       | A           | E         |    | hpcG-A261E    |
| 22204_7_236      | ERS1573056       | Control | Yes        | 2420019               | G      | A                        | hisi/STY2584.15.03      | histidine-binTransport/bi    | 92 TCG   | TTG       | S           | L         |    | hisi-S92L     |
| 22204_7_130      | ERS3403329       | Control | Yes        | 3810322               | C      | T                        | gyrB/STY3942.2.0.3      | DNA gyrase sDNA - replica    | 464 TCC  | TTT       | S           | F         |    | gyrB-F464F    |
| 24276_3_135      | ERS1909320       | Case    | No         | 4142147               | G      | A                        | glgC/STY4272.2.0.8      | glucose-1-phPolysacchari     | 110 GGC  | AGC       | G           | S         |    | glgC-G110S    |
| 22306_3_66       | ERS3403489       | Case    | No         | 2984469               | T      | C                        | fucD/STY31163.4.3       | L-fuculose isCDegradation    | 238 TTC  | CTC       | F           | L         |    | fucI-F238L    |
| 24276_3_146      | ERS3403282       | Case    | No         | 231921                | G      | A                        | fhud/STY02215.2.3       | ferrichrome-tTransport/bi    | 246 ATG  | ATA       | M           | I         |    | fhud-M246I    |
| 24276_3_135      | ERS1909320       | Case    | No         | 628273                | G      | A                        | fes/STY0629.15.23       | enterochelin Transport/bi    | 51 TGG   | TGA       | W           | *         |    | fes-W51*      |
| 22204_7_236      | ERS1573056       | Control | Yes        | 3176266               | G      | A                        | exbB/STY33315.23        | biopolymer tTransport/bi     | 54 CGC   | TGC       | R           | C         |    | exbB-R54C     |
| 24276_3_150      | ERS3403284       | Control | No         | 2038114               | C      | T                        | dcm/STY22022.0.3        | DNA-cytosineDNA - replica    | 419 GCG  | ACG       | A           | T         |    | dcm-A419T     |
| 22204_8_178      | ERS3403506       | Control | Yes        | 1692237               | C      | A                        | btuC/STY1771.5.0.2      | biotin B12 tTransport/bi     | 294 GCC  | TCC       | A           | S         |    | btuC-A294S    |
| 24276_3_135      | ERS1909320       | Case    | No         | 4018331               | C      | A                        | bisC/STY415f7.0.0       | biotin sulfoxiUnclassified/  | 570 CCG  | CAG       | P           | Q         |    | bisC-P570Q    |
| 24276_3_146      | ERS3403282       | Case    | No         | 3346023               | G      | A                        | arcB/STY3506.1.1        | aerobic respiGlobal regula   | 443 CCG  | CTG       | P           | L         |    | arcB-P443L    |
| 24276_3_135      | ERS1909320       | Case    | No         | 2169799               | C      | T                        | alkA/STY23312.2.0.3     | DNA-3-methDNA - replica      | 174 ATG  | ATA       | M           | I         |    | alkA-M174I    |
| 22204_7_274      | ERS3403567       | Case    | Yes        | 2551336               | C      | T                        | aegA/STY2717.0.0        | putative oxidUnclassified/   | 116 GCC  | ACC       | A           | T         |    | aegA-A116T    |
| 24276_3_197      | ERS1909380       | Control | Yes        | 2551116               | G      | T                        | aegA/STY2717.0.0        | putative oxidUnclassified/   | 189 GCG  | GAG       | A           | E         |    | aegA-A189E    |

1195  
1196  
1197  
1198  
1199

## Supplementary Figure 1



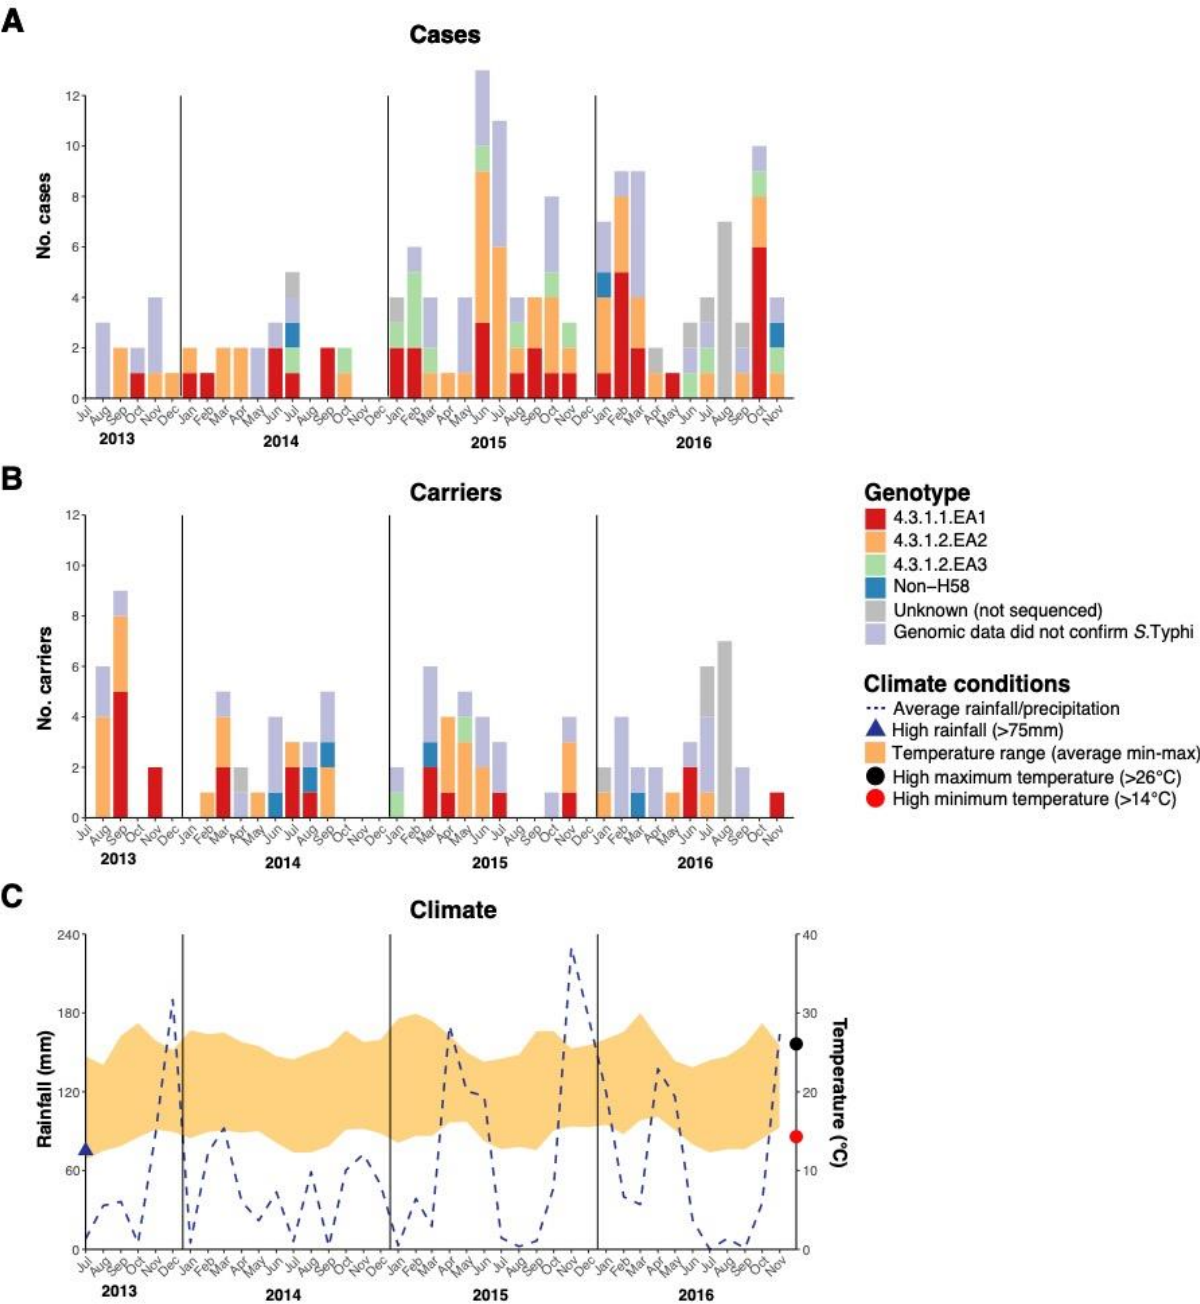

Supplementary Figure 2

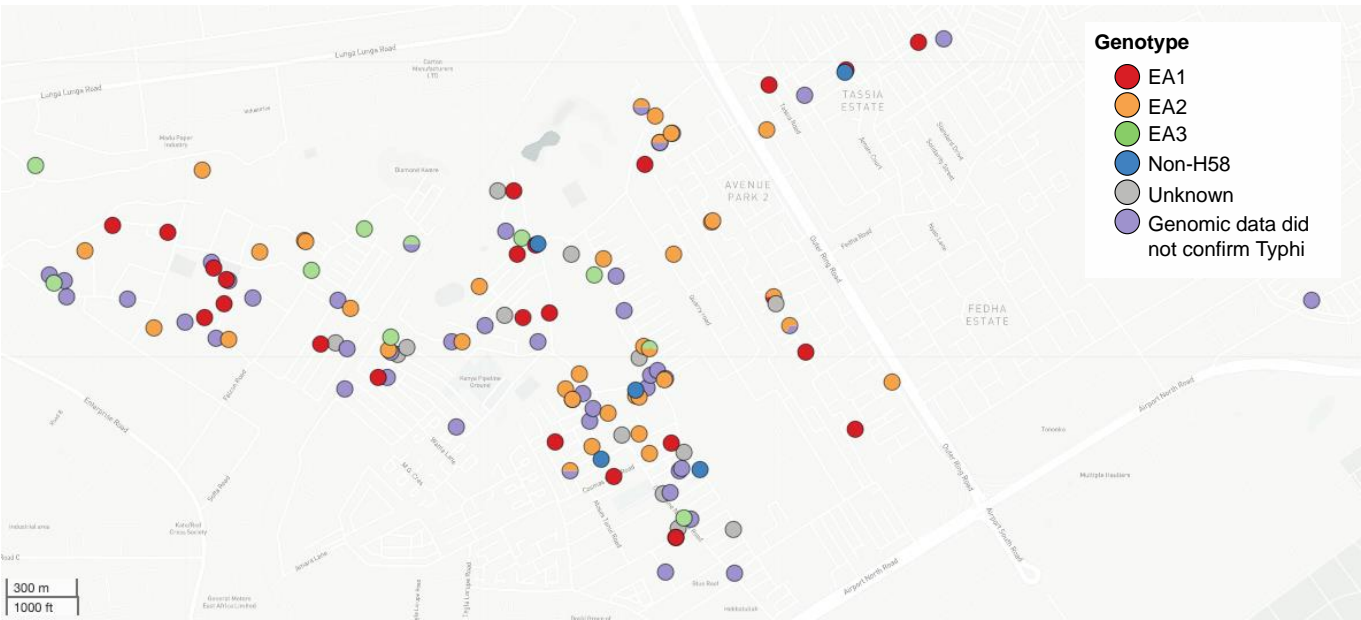

**Supplementary Figure 3**

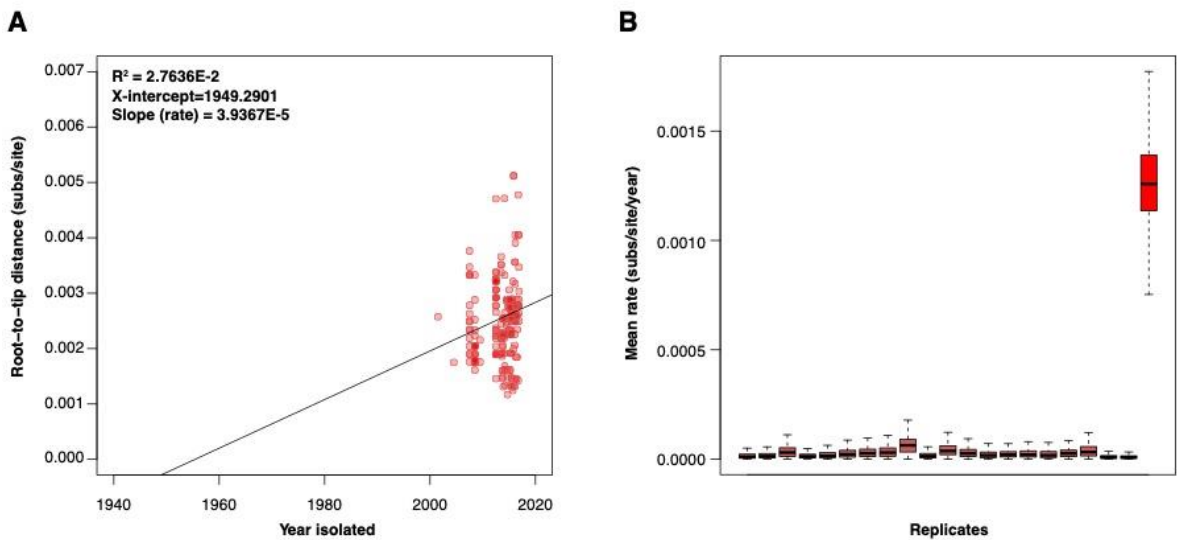

Supplementary Figure 4

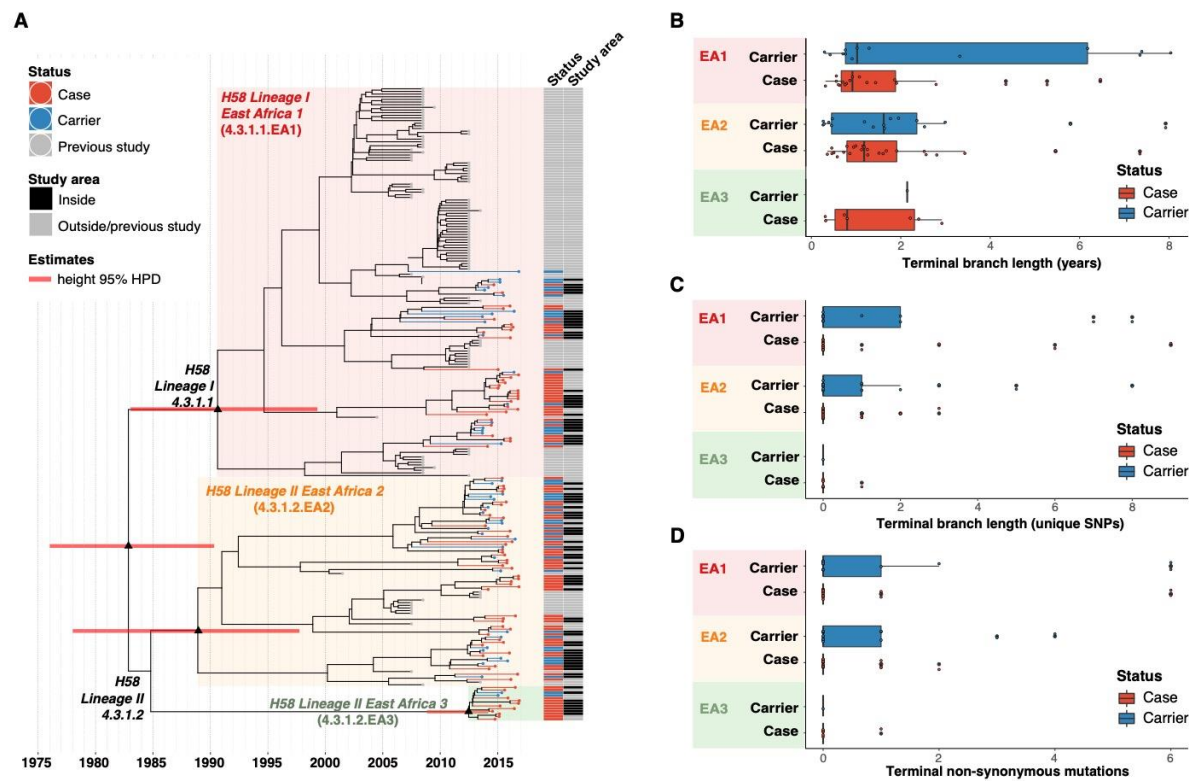

1232     **Supplementary Figure 5**

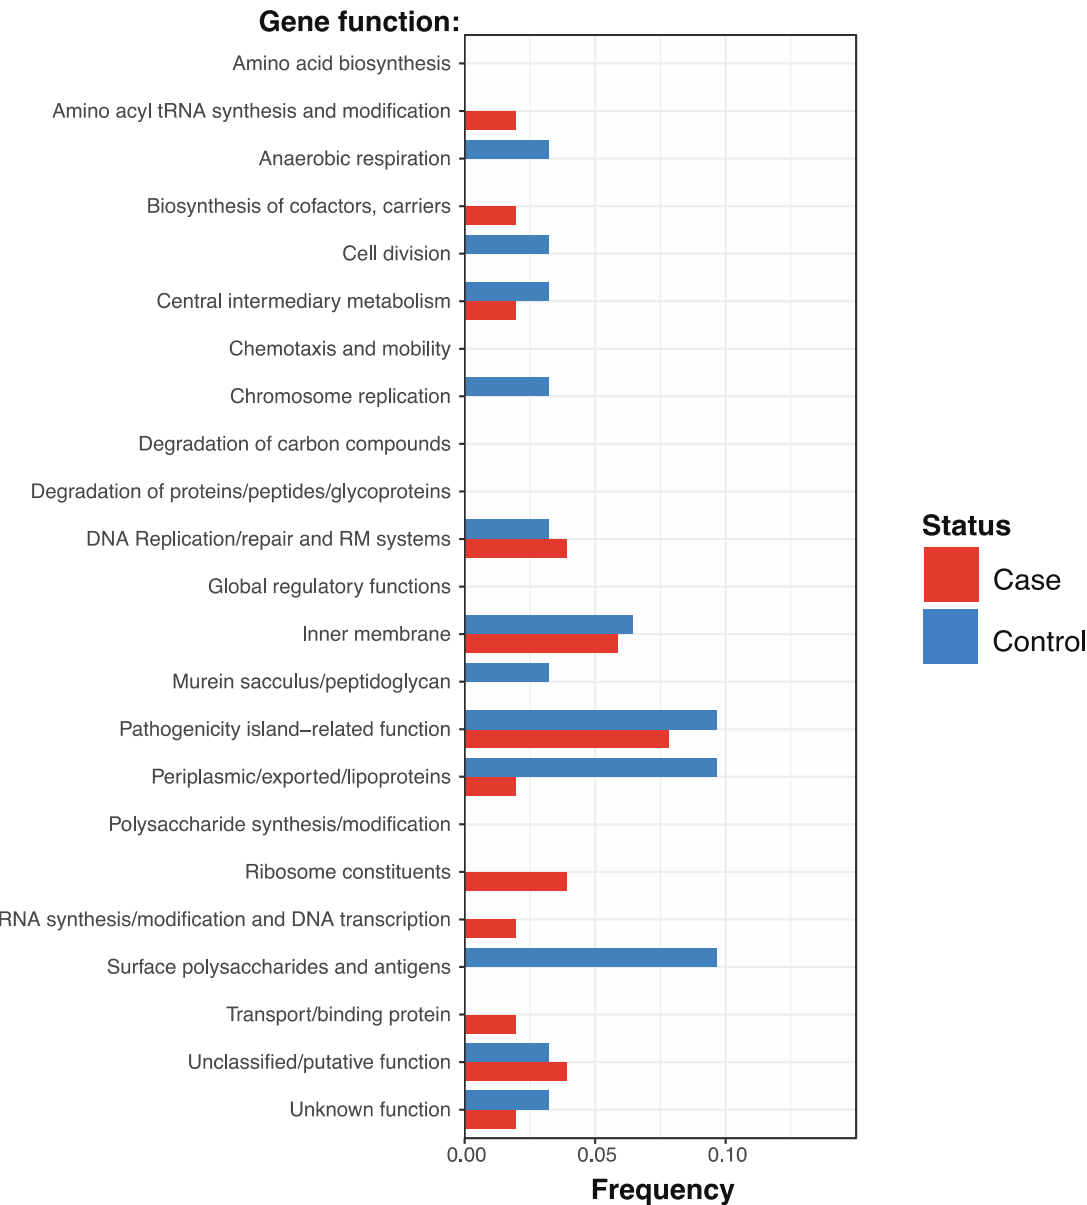

1233  
1234  
1235  
1236     **Supplementary references:**  
1237  
1238

- 1239     1     Parkhill J, Dougan G, James KD, *et al.* Complete genome sequence of a multiple  
1240     drug resistant *Salmonella enterica* serovar Typhi CT18. *Nature* 2001; **413**: 848–52.

- 1241 2 Langmead B, Salzberg SL. Fast gapped-read alignment with Bowtie 2. *Nat Meth*  
1242 2012; **9**: 357–9.
- 1243 3 Li H, Handsaker B, Wysoker A, *et al.* The Sequence Alignment/Map format and  
1244 SAMtools. *Bioinformatics* 2009; **25**: 2078–9.
- 1245 4 Wong VK, Baker S, Connor TR, *et al.* An extended genotyping framework for  
1246 *Salmonella enterica* serovar Typhi, the cause of human typhoid. *Nat Commun*  
1247 2016; **7**: 12827.
- 1248 5 Britto CD, Dyson ZA, Duchene S, *et al.* Laboratory and molecular surveillance of  
1249 paediatric typhoidal *Salmonella* in Nepal: Antimicrobial resistance and implications  
1250 for vaccine policy. *PLoS Negl Trop Dis* 2018; **12**: e0006408.
- 1251 6 Rahman SIA, Dyson ZA, Klemm EJ, *et al.* Population structure and antimicrobial  
1252 resistance patterns of *Salmonella* Typhi isolates in urban Dhaka, Bangladesh from  
1253 2004 to 2016. *PLoS Negl Trop Dis* 2020; **14**: e0008036.
- 1254 7 Wong VK, Baker S, Pickard DJ, *et al.* Phylogeographical analysis of the dominant  
1255 multidrug-resistant H58 clade of *Salmonella* Typhi identifies inter- and  
1256 intracontinental transmission events. *Nat Genet* 2015; **47**: 632–9.
- 1257 8 Pham Thanh D, Karkey A, Dongol S, *et al.* A novel ciprofloxacin-resistant subclade  
1258 of H58 *Salmonella* Typhi is associated with fluoroquinolone treatment failure. *Elife*  
1259 2016; **5**: e14003.
- 1260 9 Park SE, Pham DT, Boinett C, *et al.* The phylogeography and incidence of multi-  
1261 drug resistant typhoid fever in sub-Saharan Africa. *Nat Commun* 2018; **9**: 5094.
- 1262 10 Holt KE, Thomson NR, Wain J, *et al.* Pseudogene accumulation in the evolutionary  
1263 histories of *Salmonella enterica* serovars Paratyphi A and Typhi. *BMC Genomics*  
1264 2009; **10**: 36.
- 1265 11 Holt KE, Parkhill J, Mazzoni CJ, *et al.* High-throughput sequencing provides  
1266 insights into genome variation and evolution in *Salmonella* Typhi. *Nat Genet* 2008;  
1267 **40**: 987–93.
- 1268 12 Ingle DJ, Nair S, Hartman H, *et al.* Informal genomic surveillance of regional  
1269 distribution of *Salmonella* Typhi genotypes and antimicrobial resistance via  
1270 returning travellers. *PLoS Negl Trop Dis* 2019; **13**: e0007620.
- 1271 13 Croucher NJ, Page AJ, Connor TR, *et al.* Rapid phylogenetic analysis of large  
1272 samples of recombinant bacterial whole genome sequences using Gubbins.  
1273 *Nucleic Acids Res* 2015; **43**: e15–5.
- 1274 14 Stamatakis A. RAxML version 8: a tool for phylogenetic analysis and post-analysis  
1275 of large phylogenies. *Bioinformatics* 2014; **30**: 1312–3.

- 1276 15 Argimon S, Abudahab K, Goater RJE, *et al.* Microreact: visualizing and sharing  
1277 data for genomic epidemiology and phylogeography. *Microbial Genomics* 2016; **2**:  
1278 e000093.
- 1279 16 Yu G, Smith DK, Zhu H, Guan Y, Lam TT-Y. ggtree: an rpackage for visualization  
1280 and annotation of phylogenetic trees with their covariates and other associated  
1281 data. *Methods Ecol Evol* 2016; **8**: 28–36.
- 1282 17 Paradis E, Claude J, Strimmer K. APE: Analyses of Phylogenetics and Evolution in  
1283 R language. *Bioinformatics* 2004; **20**: 289–90.
- 1284 18 Edwards DJ, Duchêne S, Pope B, Holt KE. SNPPar: identifying convergent  
1285 evolution and other homoplasies from microbial whole-genome alignments. *bioRxiv*  
1286 DOI:10.1101/2020.07.08.194480.
- 1287 19 Thanh DP, Thieu NTV, Nguyen Thi Nguyen T, *et al.* Gallbladder carriage generates  
1288 genetic variation and genome degradation in Salmonella Typhi. *PLoS Pathog* 2020;  
1289 **16**: e1008998.
- 1290 20 Rambaut A, Lam TT, Max Carvalho L, Pybus OG. Exploring the temporal structure  
1291 of heterochronous sequences using TempEst (formerly Path-O-Gen). *Virus Evol*  
1292 2016; **2**: vew007.
- 1293 21 Suchard MA, Lemey P, Baele G, Ayres DL, Drummond AJ, Rambaut A. Bayesian  
1294 phylogenetic and phylodynamic data integration using BEAST 1.10. *Virus Evol*  
1295 2018; **4**: vey016.
- 1296 22 Duchene S, Holt KE, Weill F-X, *et al.* Genome-scale rates of evolutionary change in  
1297 bacteria. *Microb Genom* 2016; **2**: e000094.
- 1298 23 Firth C, Kitchen A, Shapiro B, Suchard MA, Holmes EC, Rambaut A. Using time-  
1299 structured data to estimate evolutionary rates of double-stranded DNA viruses. *Mol*  
1300 *Biol and Evol* 2010; **27**: 2038–51.
- 1301 24 Kariuki S, Revathi G, Kiiru J, *et al.* Typhoid in Kenya is associated with a dominant  
1302 multidrug-resistant Salmonella enterica serovar Typhi haplotype that is also  
1303 widespread in Southeast Asia. *J Clin Microbiol* 2010; **48**: 2171–6.
- 1304 25 Inouye M, Dashnow H, Raven L-A, *et al.* SRST2: Rapid genomic surveillance for  
1305 public health and hospital microbiology labs. *Genome Med* 2014; **6**: 90.
- 1306 26 Carattoli A, Zankari E, García-Fernández A, *et al.* In silico detection and typing of  
1307 plasmids using PlasmidFinder and plasmid multilocus sequence typing. *Antimicrob*  
1308 *Agents Chemother* 2014; **58**: 3895–903.
- 1309 27 Gupta SK, Padmanabhan BR, Diene SM, *et al.* ARG-ANNOT, a new bioinformatic  
1310 tool to discover antibiotic resistance genes in bacterial genomes. *Antimicrob Agents*  
1311 *Chemother* 2014; **58**: 212–20.



- 1312 28 Wick RR, Judd LM, Gorrie CL, Holt KE. Unicycler: Resolving bacterial genome  
1313 assemblies from short and long sequencing reads. *PLoS Comput Biol* 2017; **13**:  
1314 e1005595.
- 1315 29 Wick RR, Schultz MB, Zobel J, Holt KE. Bandage: interactive visualization of de  
1316 novo genome assemblies. *Bioinformatics* 2015; **31**: 3350–2.
- 1317 30 Hawkey J, Hamidian M, Wick RR, *et al.* ISMapper: identifying transposase insertion  
1318 sites in bacterial genomes from short read sequence data. *BMC Genomics* 2015;  
1319 **16**: 667–11.
- 1320 31 Jaillard M, Lima L, Tournoud M, *et al.* A fast and agnostic method for bacterial  
1321 genome-wide association studies: Bridging the gap between k-mers and genetic  
1322 events. *PLoS Genet* 2018; **14**: e1007758.
- 1323 32 Dixon P. VEGAN, a package of R functions for community ecology. *J Veg Sci* 2003;  
1324 **14**: 927–30.
- 1325 33 Accou-Demartin M, Gaborieau V, Song Y, *et al.* Salmonella enterica Serotype  
1326 Typhi with nonclassical quinolone resistance phenotype. *Emerg Infect Dis* 2011;  
1327 **17**: 1091–4.
- 1328 34 Feasey NA, Gaskell K, Wong V, *et al.* Rapid emergence of multidrug resistant,  
1329 H58-lineage Salmonella typhi in Blantyre, Malawi. *PLoS Negl Trop Dis* 2015; **9**:  
1330 e0003748.

1331  
1332
